# Supplementary material for: Synthesis and anti-liver fibrotic activity study of a chalcone derivative through anti-inflammatory effects and inhibition of JNK/NF-κB signaling pathways
Source: Research Square preprint supplement (doi:10.21203/rs.3.rs-8102523/v1), 2025-11-26
Supplement: Supplementary file 1 [file fde7f7e3ae87690166f4eff5.docx]

**Synthesis and anti-liver fibrotic activity study of a chalcone derivative through anti-inflammatory effects and inhibition of JNK/NF-κB signaling pathways**

Chunwei Lv1,#, Lei Zhang2,#, Chenxu Wang1,Tingting Jin1,Zhishun Zhang1,Yixi Li1,Dian He1*, Quanyi Zhao1, Lifang Zheng1

*(1 Institute of Medicinal Chemistry, School of Pharmacy of Lanzhou University, Lanzhou 730000, China.2 Gansu Medical Device Inspection And Testing Institute,Lanzhou 730000, China.)*

*Corresponding author: [hed@lzu.edu.cn](mailto:hed@lzu.edu.cn) (Dian He).

# These authors contributed equally to the work

[1.Compound Safety Concentration Assay 1](#_Toc729)

[2. The data of NMR and HRMS of target compounds. 2](#_Toc19276)

[3. 1H NMR, 13C NMR and ESI-HRMS spectrum of target compounds. 8](#_Toc16497)

[4.Analytical RP-HPLC chromatograms of Compounds. 48](#_Toc9332)

**1.Compound Safety Concentration Assay**

RAW264.7 cells cultured to the logarithmic growth phase were seeded at a density of 7 × 10⁴ cells/mL in a 96-well plate and incubated overnight in a culture incubator. Once the cells have fully adhered, the target compounds at final concentrations of 50 μM and 100 μM are added to the cells, with DMSO-treated control wells included. The plates are then incubated in the incubator for an additional 24 hours. After incubation, 10 μL of MTT solution at a concentration of 5 mg/mL is added to each well, and the plates are incubated in the incubator for another 4 hours. The supernatant is then removed, add 100 μL of DMSO to each well to dissolve the formed purple methylene blue, and measure the absorbance at 570 nm using a microplate reader. All experiments were independently repeated three times, and the cell survival rate was calculated in the presence of target compounds at concentrations of 50 μM and 100 μM.


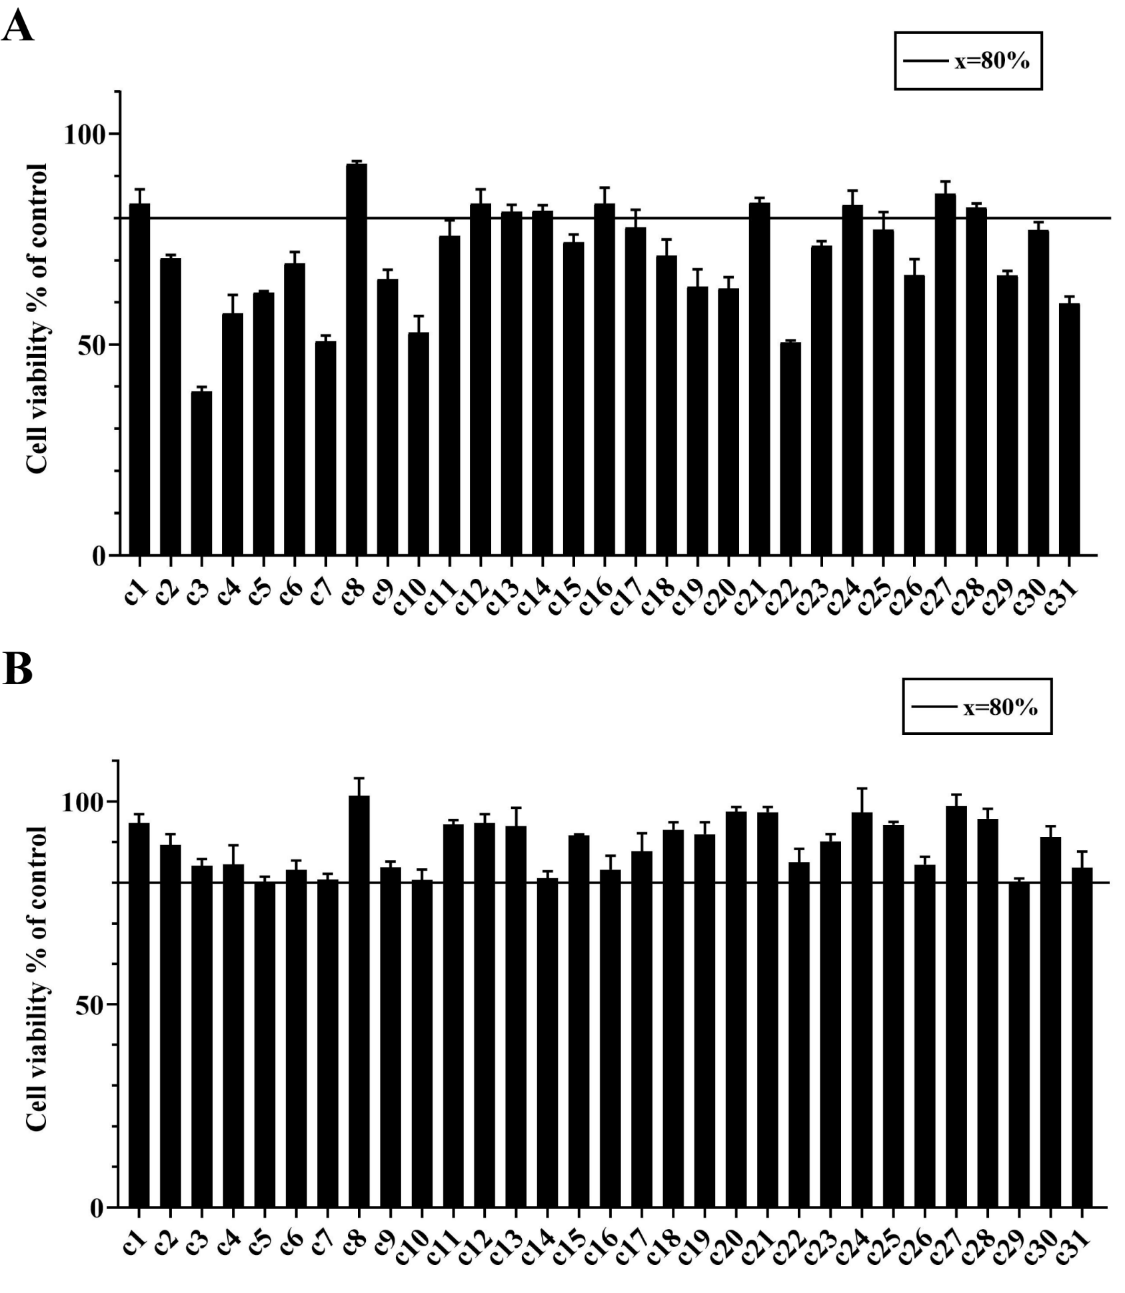


Fig.S1 Effect of the target compound on the viability of RAW264.7 cells. (A) Cell viability after treatment with 100 μM of the target compound; (B) Cell viability after treatment with 50 μM of the target compound.

1. **The data of NMR and HRMS of target compounds.**

**c1:** White solid,yield: 69.3%.1H NMR (400 MHz, DMSO-*d*6) δ 14.00 (s, 1H), 8.81 (s, 1H), 8.71 (d, *J* = 2.2 Hz, 1H), 8.27 – 8.18 (m, 2H), 7.99 (d, *J* = 15.5 Hz, 1H), 7.89 (dd, *J* = 7.2, 2.4 Hz, 2H), 7.76 (d, *J* = 15.5 Hz, 1H), 7.48 (m, 4H), 7.06 (d, *J* = 8.7 Hz, 1H); 13C NMR (100 MHz, DMSO-*d*6) δ 187.19, 172.29, 166.04, 143.91, 135.28, 134.86, 131.01, 130.08, 129.41, 129.25, 129.00, 122.17, 118.71, 114.27; ESI-MS: calcd. for C16H13NO3 [M+H]+ 268.0974, found 268.0983.

**c2:** White solid,yield: 21.7%.1H NMR (400 MHz, DMSO-*d*6) δ 13.95 (s, 1H), 8.79 (s, 1H), 8.69 (d, *J* = 2.2 Hz, 1H), 8.20 (dd, *J* = 8.7, 2.2 Hz, 2H), 8.15 – 8.06 (m, 1H), 8.02 (d, *J* = 15.7 Hz, 1H), 7.84 (d, *J* = 15.7 Hz, 1H), 7.53 (dd, *J* = 7.6, 5.4 Hz, 1H), 7.34 (m, 2H), 7.05 (d, *J* = 8.7 Hz, 1H). 13C NMR (100 MHz, DMSO-*d*6) δ 187.07, 172.17, 166.20, 162.59, 160.09, 134.91, 133.12, 133.04, 130.29, 129.25, 128.73, 125.45, 125.42, 124.39, 124.35, 123.00, 122.89, 118.77, 116.72, 116.51, 114.48. ESI-MS: calcd. for C16H12FNO3 [M-H]- 284.0729, found 284.0729.

**c3:**White solid,yield: 45.2%. 1H NMR (400 MHz, DMSO-*d*6) δ 13.97 (s, 1H), 8.76 (s, 1H), 8.69 (d, *J* = 2.2 Hz, 1H), 8.27 – 8.18 (m, 2H), 8.02 (d, *J* = 15.5 Hz, 1H), 7.84 – 7.74 (m, 2H), 7.74 – 7.65 (m, 2H), 7.52 (td, *J* = 7.9, 6.0 Hz, 1H), 7.30 (td, *J* = 8.6, 2.6 Hz, 1H), 7.05 (d, *J* = 8.7 Hz, 1H). 13C NMR (100 MHz, DMSO-*d*6) δ 187.12, 172.23, 166.11, 164.18, 161.76, 142.41, 142.38, 137.91, 137.83, 134.92, 131.42, 131.34, 130.22, 128.84, 125.90, 125.88, 123.65, 118.70, 117.76, 117.55, 115.12, 114.91, 114.36. ESI-MS: calcd. for C16H12FNO3 [M-H]- 284.0729, found 284.0728.

**c4:** White solid,yield: 41.7%. 1H NMR (400 MHz, DMSO-*d*6) δ 13.98 (s, 1H), 8.80 (s, 1H), 8.71 (d, *J* = 2.2 Hz, 1H), 8.27 – 8.19 (m, 2H), 7.96 (m,3H), 7.77 (d, *J* = 15.5 Hz, 1H), 7.34 (t, *J* = 8.8 Hz, 2H), 7.06 (d, *J* = 8.7 Hz, 1H). 13C NMR (100 MHz, DMSO-*d*6) δ 187.12, 172.27, 166.01, 165.05, 162.58, 142.61, 134.83, 131.98, 131.95, 131.57, 131.48, 130.10, 128.98, 122.11, 122.08, 118.64, 116.52, 116.30, 114.31. ESI-MS: calcd. for C16H12FNO3 [M+H]+ 286.0873, found 286.0890.

**c5:** white solid,yield: 23.5%.1H NMR (400 MHz, DMSO-*d*6) δ 13.96 (s, 1H), 8.78 (s, 1H), 8.70 (d, *J* = 2.2 Hz, 1H), 8.28 – 8.17 (m, 2H), 8.06 (d, *J* = 15.5 Hz, 1H), 7.97 – 7.88 (m, 2H), 7.77 (d, *J* = 15.6 Hz, 1H), 7.62 (t, *J* = 7.9 Hz, 1H), 7.46 (d, *J* = 8.3 Hz, 1H), 7.05 (d, *J* = 8.7 Hz, 1H). 13C NMR (100 MHz, DMSO-*d*6) δ 187.10, 172.24, 166.06, 142.39, 135.46, 134.87, 134.27, 130.91, 130.16, 129.45, 128.91, 122.94, 118.68, 114.33. ESI-MS: calcd. for C16H12ClNO3 [M-H]- 300.0434, found 300.0436.

**c6:** White solid,yield: 39.7%.1H NMR (400 MHz, DMSO-*d*6) δ 13.97 (s, 1H), 8.77 (s, 1H), 8.69 (d, *J* = 2.2 Hz, 1H), 8.22 (dd, *J* = 8.7, 2.1 Hz, 2H), 8.06 – 7.98 (m, 2H), 7.82 (d, *J* = 6.0 Hz, 1H), 7.72 (d, *J* = 15.5 Hz, 1H), 7.51 (m, 2H), 7.05 (d, *J* = 8.7 Hz, 1H). 13C NMR (100 MHz, DMSO-*d*6) δ 187.11, 172.22, 166.11, 142.16, 137.56, 134.94, 134.28, 131.21, 130.55, 130.26, 128.84, 128.29, 128.24, 123.74, 118.68, 114.37. ESI-MS: calcd. for C16H12ClNO3 [M+Na]+ 324.0398, found 324.0410.

**c7:**White solid,yield: 42.1%.1H NMR (400 MHz, DMSO-*d*6) δ 13.98 (s, 1H), 8.79 (s, 1H), 8.70 (d, *J* = 2.2 Hz, 1H), 8.28 – 8.16 (m, 2H), 8.00 (d, *J* = 15.6 Hz, 1H), 7.92 (d, *J* = 8.3 Hz, 2H), 7.75 (d, *J* = 15.6 Hz, 1H), 7.55 (d, *J* = 8.2 Hz, 2H), 7.06 (d, *J* = 8.7 Hz, 1H). 13C NMR (100 MHz, DMSO-*d*6) δ 187.09, 172.24, 166.06, 142.38, 135.46, 134.86, 134.26, 130.90, 130.16, 129.44, 128.90, 122.93, 118.68, 114.33. ESI-MS: calcd. for C16H12ClNO3 [M-H]- 300.0434, found 300.0434.

**c8:** White solid,yield: 20.3%.1H NMR (400 MHz, DMSO-*d*6) δ 13.98 (s, 1H), 8.78 (s, 1H), 8.70 (d, *J* = 2.2 Hz, 1H), 8.27 – 8.19 (m, 2H), 8.16 (t, *J* = 1.8 Hz, 1H), 8.03 (d, *J* = 15.6 Hz, 1H), 7.86 (d, *J* = 7.7 Hz, 1H), 7.72 (d, *J* = 8.4 Hz, 1H), 7.71 – 7.62 (m, 2H), 7.44 (t, *J* = 7.9 Hz, 1H), 7.05 (d, *J* = 8.7 Hz, 1H). 13C NMR (100 MHz, DMSO-*d*6) δ 187.10, 172.23, 166.10, 141.64, 137.82, 134.95, 133.44, 131.46, 131.17, 129.82, 128.85, 128.59, 123.71, 122.88, 118.66, 114.37. ESI-MS: calcd. for C16H12BrNO3 [M-H]- 343.9929, found 343.9928.

**c9:**White solid,yield: 37.8%. 1H NMR (400 MHz, DMSO-*d*6) δ 13.98 (s, 1H), 8.79 (s, 1H), 8.70 (d, *J* = 2.2 Hz, 1H), 8.23 (dd, *J* = 8.8, 2.2 Hz, 2H), 8.17 (t, *J* = 1.8 Hz, 1H), 8.03 (d, *J* = 15.6 Hz, 1H), 7.86 (d, *J* = 7.9 Hz, 1H), 7.72 (d, *J* = 15.6 Hz, 1H), 7.66 (ddd, *J* = 8.0, 2.0, 1.0 Hz, 1H), 7.44 (t, *J* = 7.9 Hz, 1H), 7.06 (d, *J* = 8.8 Hz, 1H). 13C NMR (100 MHz, DMSO-*d*6) δ 187.17, 172.30, 166.17, 142.17, 137.88, 135.02, 133.51, 131.52, 131.24, 130.33, 128.91, 128.66, 123.78, 122.94, 118.73, 114.43. ESI-MS: calcd. for C16H12BrNO3 [M+Na]+ 369.9878, found 369.9879.

**c10:** White solid,yield: 45.7%. 1H NMR (400 MHz, DMSO-*d*6) δ 13.98 (s, 1H), 8.79 (s, 1H), 8.69 (d, *J* = 2.2 Hz, 1H), 8.25 – 8.18 (m, 2H), 8.01 (d, *J* = 15.5 Hz, 1H), 7.89 – 7.80 (m, 2H), 7.77 – 7.65 (m, 3H), 7.05 (d, *J* = 8.8 Hz, 1H). 13C NMR (100 MHz, DMSO-*d*6) δ 187.17, 172.31, 166.14, 142.55, 134.94, 134.66, 132.44, 131.19, 130.23, 128.97, 124.39, 123.04, 118.75, 114.40. ESI-MS: calcd. for C16H12BrNO3 [M+H]+ 346.0073, found 346.0082.

**c13:** White solid,yield: 71.5%. 1H NMR (400 MHz, DMSO-*d*6) δ 13.97 (s, 1H), 8.79 (s, 1H), 8.68 (d, *J* = 2.2 Hz, 1H), 8.26 – 8.16 (m, 2H), 7.93 (d, *J* = 15.5 Hz, 1H), 7.80 – 7.67 (m, 3H), 7.29 (d, *J* = 8.0 Hz, 2H), 7.04 (d, *J* = 8.7 Hz, 1H), 2.35 (s, 3H). 13C NMR (100 MHz, DMSO*-d*6) δ 187.14, 172.32, 165.97, 143.96, 141.06, 134.81, 132.56, 130.03, 129.98, 129.28, 129.10, 121.07, 118.66, 114.24, 21.56. ESI-MS: calcd. for C17H15NO3 [M+H]+ 282.1124, found 282.1228.

**c14:** White solid,yield: 70.3%. 1H NMR (400 MHz, DMSO-*d*6) δ 14.00 (s, 1H), 8.83 (s, 1H), 8.70 (d, *J* = 2.2 Hz, 1H), 8.28 – 8.18 (m, 2H), 7.97 (d, *J* = 15.5 Hz, 1H), 7.76 – 7.71 (m, 2H), 7.69 (d, *J* = 7.8 Hz, 1H), 7.39 (t, *J* = 7.6 Hz, 1H), 7.31 (d, *J* = 7.7 Hz, 1H), 7.05 (d, *J* = 8.7 Hz, 1H), 2.66 (q, *J* = 7.6 Hz, 2H), 1.22 (t, *J* = 7.6 Hz, 3H). 13C NMR (100 MHz, DMSO-*d*6) δ 187.25, 172.36, 166.08, 145.09, 135.30, 135.11, 134.83, 130.23, 130.05, 129.06, 128.79, 128.65, 119.08, 118.39, 114.32, 28.63, 16.25, 16.13. ESI-MS: calcd. for C18H17NO3 [M-H]- 294.1136, found 294.1147.

**c15:**White solid,yield: 66.7%.1H NMR (400 MHz, DMSO-*d*6) δ 14.04 (s, 1H), 8.83 (s, 1H), 8.71 (d, *J* = 2.2 Hz, 1H), 8.25 (s, 1H), 8.19 (dd, *J* = 8.8, 2.1 Hz, 1H), 8.03 (d, *J* = 15.3 Hz, 1H), 7.98 (dd, *J* = 7.7, 1.5 Hz, 1H), 7.91 (d, *J* = 15.3 Hz, 1H), 7.38 (td, *J* = 7.4, 1.5 Hz, 1H), 7.35 – 7.27 (m, 2H), 7.05 (d, *J* = 8.7 Hz, 1H), 2.79 (q, *J* = 7.6 Hz, 2H), 1.16 (t, *J* = 7.5 Hz, 3H). 13C NMR (100 MHz, DMSO-*d*6) δ 187.22, 172.39, 166.19, 144.55, 140.82, 135.01, 134.79, 133.23, 129.44, 129.02, 128.98, 127.53, 126.47, 123.20, 118.44, 114.19, 26.32, 16.61. ESI-MS: calcd. for C18H17NO3 [M-H]- 294.1136, found 294.1134.

**c16:** White solid,yield: 73.2%.1H NMR (400 MHz, DMSO-*d*6) δ 14.00 (s, 1H), 8.82 (s, 1H), 8.69 (d, *J* = 2.2 Hz, 1H), 8.25 (s, 1H), 8.20 (dd, *J* = 8.7, 2.1 Hz, 1H), 7.94 (d, *J* = 15.5 Hz, 1H), 7.79 (d, *J* = 8.1 Hz, 2H), 7.73 (d, *J* = 15.4 Hz, 1H), 7.31 (d, *J* = 8.2 Hz, 2H), 7.04 (d, *J* = 8.7 Hz, 1H), 2.64 (q, *J* = 7.6 Hz, 2H), 1.19 (t, *J* = 7.6 Hz, 3H). 13C NMR (100 MHz, DMSO-*d*6) δ 187.19, 172.40, 166.08, 147.36, 135.02, 134.79, 132.88, 130.08, 129.56, 129.36, 129.14, 129.10, 128.83, 128.49, 118.36, 114.25, 28.68, 15.89. ESI-MS: calcd. for C18H17NO3 [M-H]- 294.1136, found 294.1134.

**c17:**Light yellow solid,yield: 67.1%. 1H NMR (400 MHz, DMSO-*d*6) δ 14.01 (s, 1H), 8.85 (s, 1H), 8.73 (d, *J* = 2.2 Hz, 1H), 8.29 – 8.19 (m, 2H), 8.13 (d, *J* = 15.6 Hz, 1H), 8.02 (d, *J* = 7.8 Hz, 1H), 7.96 (d, *J* = 15.7 Hz, 1H), 7.54 – 7.48 (m, 1H), 7.17 (d, *J* = 8.4 Hz, 1H), 7.10 (t, *J* = 8.6 Hz, 2H), 3.94 (s, 3H). 13C NMR (100 MHz, DMSO-*d*6) δ 187.30, 172.27, 165.90, 158.61, 138.19, 134.80, 132.73, 129.99, 129.15, 128.35, 123.59, 121.84, 121.12, 118.64, 114.33, 112.31, 56.20. ESI-MS: calcd. for C17H15NO4 [M+H]+ 298.1073, found 298.1220.

**c19:**Light yellow solid,yield: 59.6%. 1H NMR (400 MHz, DMSO-*d*6) δ 13.96 (s, 1H), 8.80 (s, 1H), 8.69 (d, *J* = 2.2 Hz, 1H), 8.26 – 8.14 (m, 2H), 7.88 – 7.78 (m, 3H), 7.72 (d, *J* = 15.5 Hz, 1H), 7.02 (t, *J* = 8.2 Hz, 3H), 3.81 (s, 3H). 13C NMR (101 MHz, DMSO-*d*6) δ 187.08, 172.37, 165.87, 161.75, 143.82, 134.73, 131.07, 129.89, 129.26, 127.92, 119.66, 118.57, 114.85, 114.23, 55.79. ESI-MS: calcd. for C17H15NO4 [M+Na]+ 320.0893, found 320.0902.

**c20:**White solid,yield: 74.2%. 1H NMR (400 MHz, DMSO-*d*6) δ 13.98 (s, 1H), 8.80 (s, 1H), 8.69 (d, *J* = 2.3 Hz, 1H), 8.18 (dd, *J* = 8.7, 2.2 Hz, 2H), 8.09 (d, *J* = 15.3 Hz, 1H), 7.85 – 7.74 (m, 2H), 7.26 (d, *J* = 7.4 Hz, 1H), 7.19 (t, *J* = 7.5 Hz, 1H), 7.04 (d, *J* = 8.6 Hz, 1H), 2.32 (s, 3H), 2.29 (s, 3H). 13C NMR (100 MHz, DMSO-*d*6) δ 187.27, 172.36, 166.05, 141.01, 140.77, 138.50, 134.85, 132.02, 131.17, 130.06, 129.16, 127.60, 127.25, 121.96, 118.78, 114.28, 21.48, 19.74. ESI-MS: calcd. for C18H17NO3 [M-H]- 294.1136, found 294.1146.

**c21:** White solid,yield: 72.1%. 1H NMR (400 MHz, DMSO-*d*6) δ 13.96 (s, 1H), 8.79 (s, 1H), 8.68 (d, *J* = 2.2 Hz, 1H), 8.18 (dd, *J* = 8.7, 2.1 Hz, 2H), 7.97 (d, *J* = 15.3 Hz, 1H), 7.89 (d, *J* = 7.8 Hz, 1H), 7.83 (d, *J* = 15.4 Hz, 1H), 7.12 (m, 2H), 7.04 (d, *J* = 8.7 Hz, 1H), 2.41 (s, 3H), 2.31 (s, 3H). 13C NMR (100 MHz, DMSO-*d*6) δ 187.27, 172.37, 166.05, 141.01, 140.77, 138.50, 134.85, 132.03, 131.17, 130.06, 129.17, 127.60, 127.26, 121.97, 118.78, 114.28, 21.48, 19.75. ESI-MS: calcd. for C18H17NO3 [M-H]- 294.1136, found 294.1136.

**c22:**White solid,76.9%. 1H NMR (400 MHz, DMSO-*d*6) δ 13.97 (s, 1H), 8.81 (s, 1H), 8.70 (d, *J* = 2.2 Hz, 1H), 8.23 – 8.15 (m, 2H), 7.97 (d, *J* = 15.3 Hz, 1H), 7.84 (d, *J* = 15.3 Hz, 1H), 7.76 (s, 1H), 7.16 (s, 2H), 7.04 (d, *J* = 8.8 Hz, 1H), 2.38 (s, 3H), 2.34 (s, 3H). 13C NMR (100 MHz, DMSO-*d*6) δ 187.27, 172.28, 165.99, 141.17, 135.81, 135.41, 134.82, 133.70, 131.54, 131.19, 130.10, 129.07, 127.50, 122.79, 118.68, 114.28, 21.07, 19.32. ESI-MS: calcd. for C18H17NO3 [M-H]- 294.1136, found 294.1148.

**c23:** White solid,yield: 63.4%. 1H NMR (400 MHz, DMSO-*d*6) δ 13.96 (s, 1H), 8.79 (s, 1H), 8.68 (d, *J* = 2.2 Hz, 1H), 8.26 – 8.14 (m, 2H), 8.01 (d, *J* = 15.7 Hz, 1H), 7.92 (d, *J* = 15.7 Hz, 1H), 7.60 (dd, *J* = 6.7, 2.7 Hz, 1H), 7.20 – 7.13 (m, 2H), 7.04 (d, *J* = 8.6 Hz, 1H), 3.82 (d, *J* = 16.4 Hz, 6H). 13C NMR (100 MHz, DMSO-*d*6) δ 187.30, 172.25, 166.00, 153.29, 148.70, 137.83, 134.81, 130.07, 129.03, 128.85, 124.74, 123.00, 119.30, 118.71, 115.39, 114.30, 61.50, 56.29. ESI-MS: calcd. for C18H17NO5 [M-H]- 326.1035, found 326.1035.

**c24: Y**ellow solid,yield: 76.2%. 1H NMR (400 MHz, DMSO-*d*6) δ 13.90 (s, 1H), 8.78 (s, 1H), 8.66 (d, *J* = 2.2 Hz, 1H), 8.22 – 8.13 (m, 2H), 8.03 (d, *J* = 15.6 Hz, 1H), 7.93 (d, *J* = 8.6 Hz, 1H), 7.79 (d, *J* = 15.6 Hz, 1H), 7.03 (d, *J* = 8.7 Hz, 1H), 6.66 (m, 2H), 3.91 (s, 3H), 3.85 (s, 3H). 13C NMR (100 MHz, DMSO-*d*6) δ 187.20, 172.30, 165.67, 163.55, 160.29, 138.34, 134.70, 129.83, 129.43, 119.04, 118.52, 116.99, 116.48, 114.31, 106.89, 98.72, 56.32, 56.03. ESI-MS: calcd. for C18H17NO5 [M+H]+ 328.1179, found 328.1198.

**c26:**White solid,yield: 61.3%. 1H NMR (400 MHz, DMSO-*d*6) δ 13.73 (s, 1H), 8.75 (s, 1H), 8.57 (s, 1H), 8.17 – 7.95 (m, 4H), 7.38 (t, *J* = 8.4 Hz, 1H), 7.03 (d, *J* = 8.5 Hz, 1H), 6.75 (d, *J* = 8.5 Hz, 2H), 3.90 (s, 6H). 13C NMR (100 MHz, DMSO-*d*6) δ 189.36, 172.49, 165.77, 160.91, 135.43, 135.10, 133.20, 130.52, 130.24, 124.91, 118.89, 115.60, 112.73, 105.19, 57.08. ESI-MS: calcd. for C18H17NO5 [M-H]- 326.1035, found 326.1031.

**c30:** Fluorescent yellow solid,yield: 65.2%.1H NMR (400 MHz, DMSO-*d*6) δ 13.87 (s, 1H), 8.76 (s, 1H), 8.65 (s, 1H), 8.24 – 8.16 (m, 2H), 8.06 (d, *J* = 15.5 Hz, 1H), 7.76 (d, *J* = 15.5 Hz, 1H), 7.50 (s, 1H), 7.03 (d, *J* = 8.7 Hz, 1H), 6.75 (s, 1H), 3.89 (d, *J* = 10.3 Hz, 6H), 3.82 (s, 3H). 13C NMR (100 MHz, DMSO-*d*6) δ 187.24, 172.29, 165.72, 151.69, 149.46, 144.40, 134.85, 130.00, 129.33, 128.09, 123.86, 119.87, 118.43, 114.47, 112.13, 111.79, 56.23, 56.10, 55.39. ESI-MS: calcd. for C19H19NO6 [M-H]- 356.1140, found 356.1139.

1. **1H NMR, 13C NMR and ESI-HRMS spectrum of target compounds.**

Compound **c1**

1H NMR


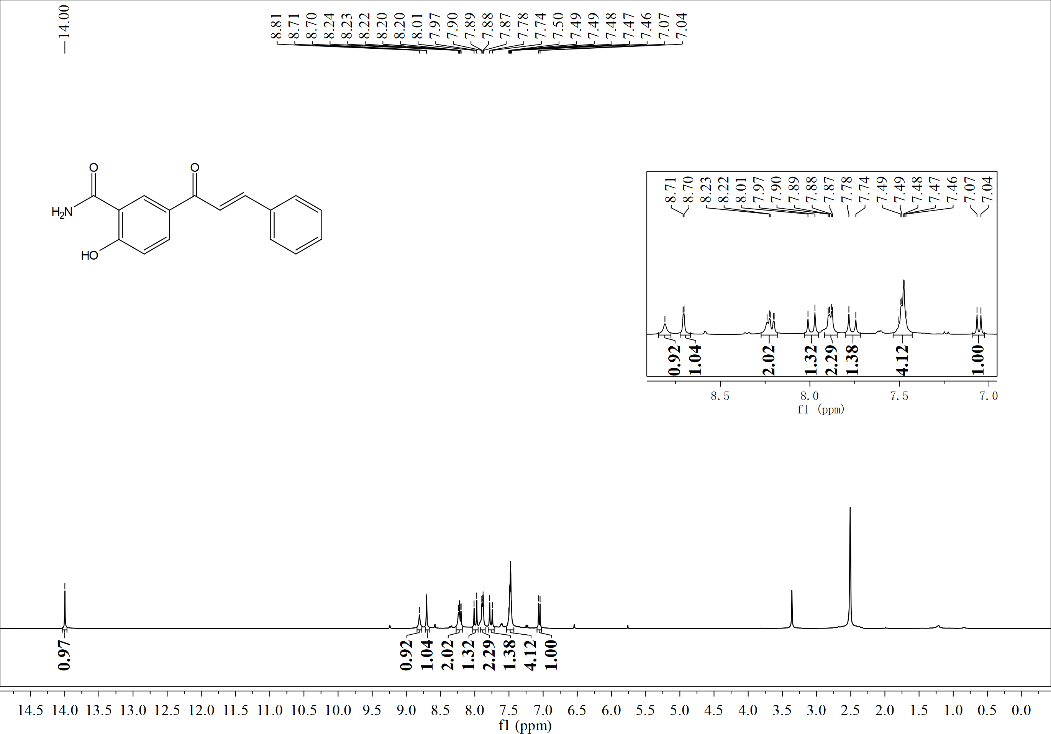


13C NMR


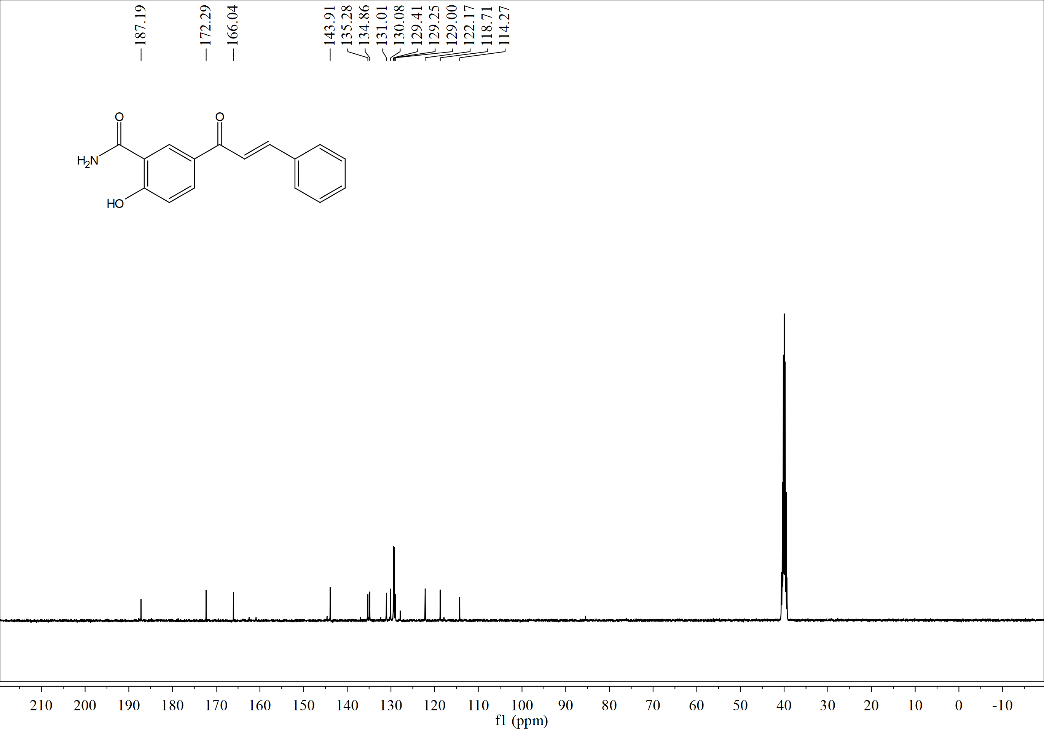


HRMS


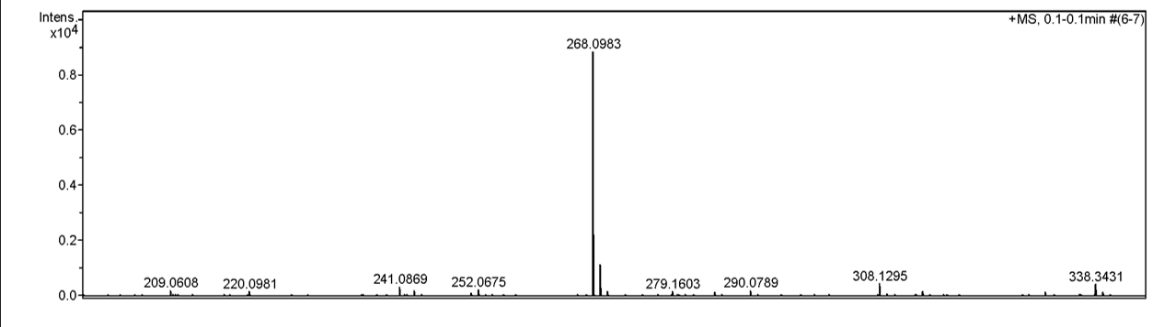


Compound **c2**

1H NMR


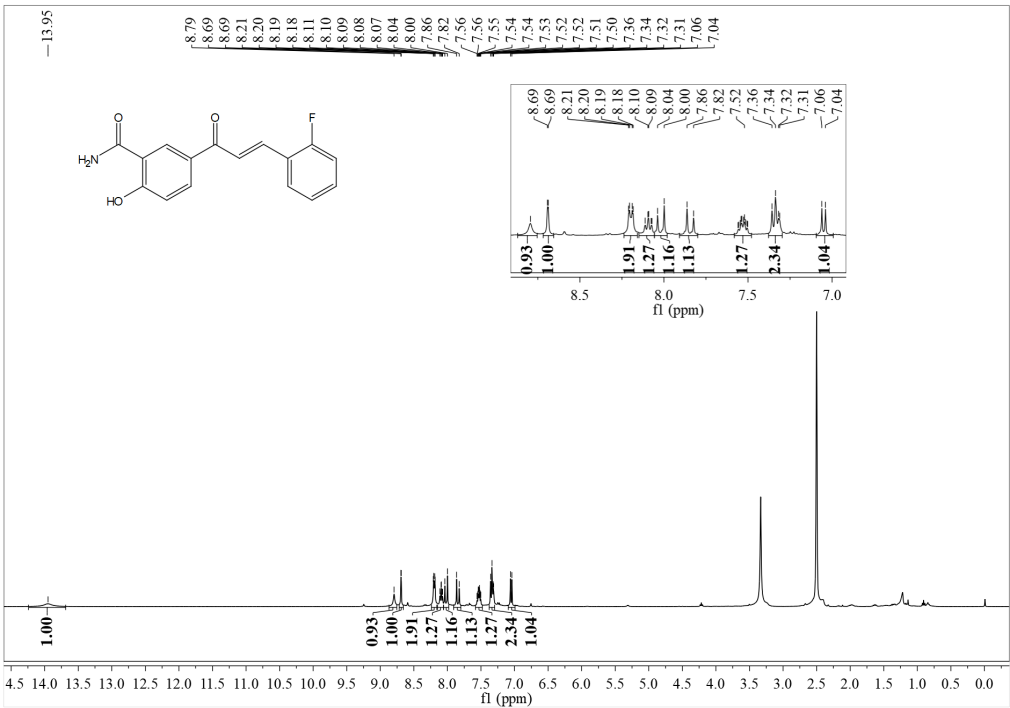


13C NMR


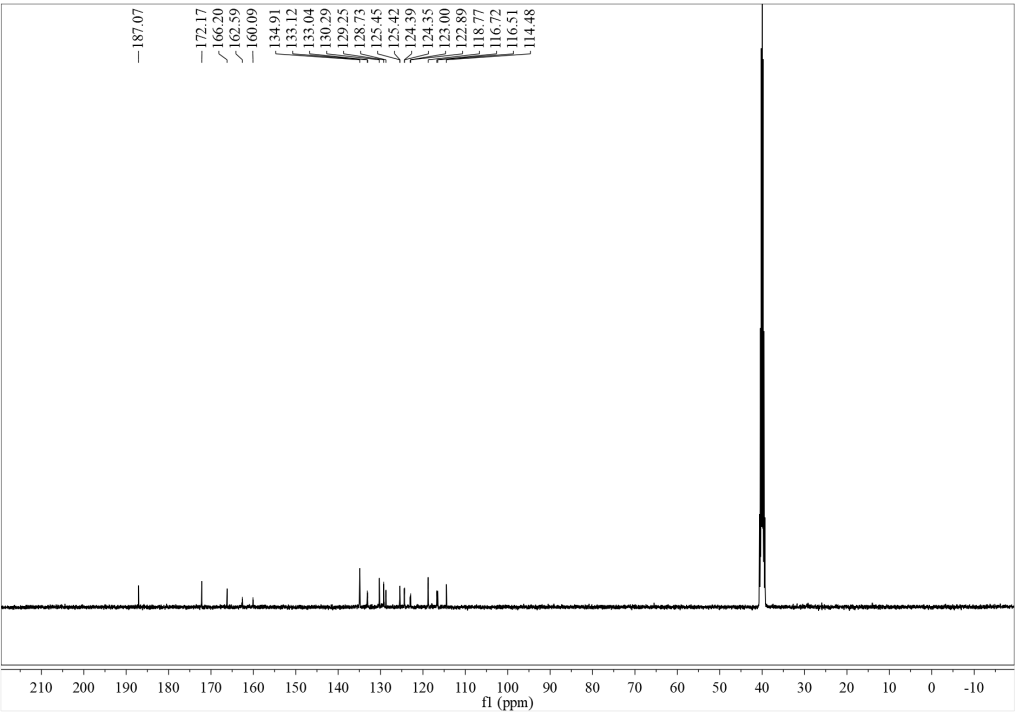


HRMS


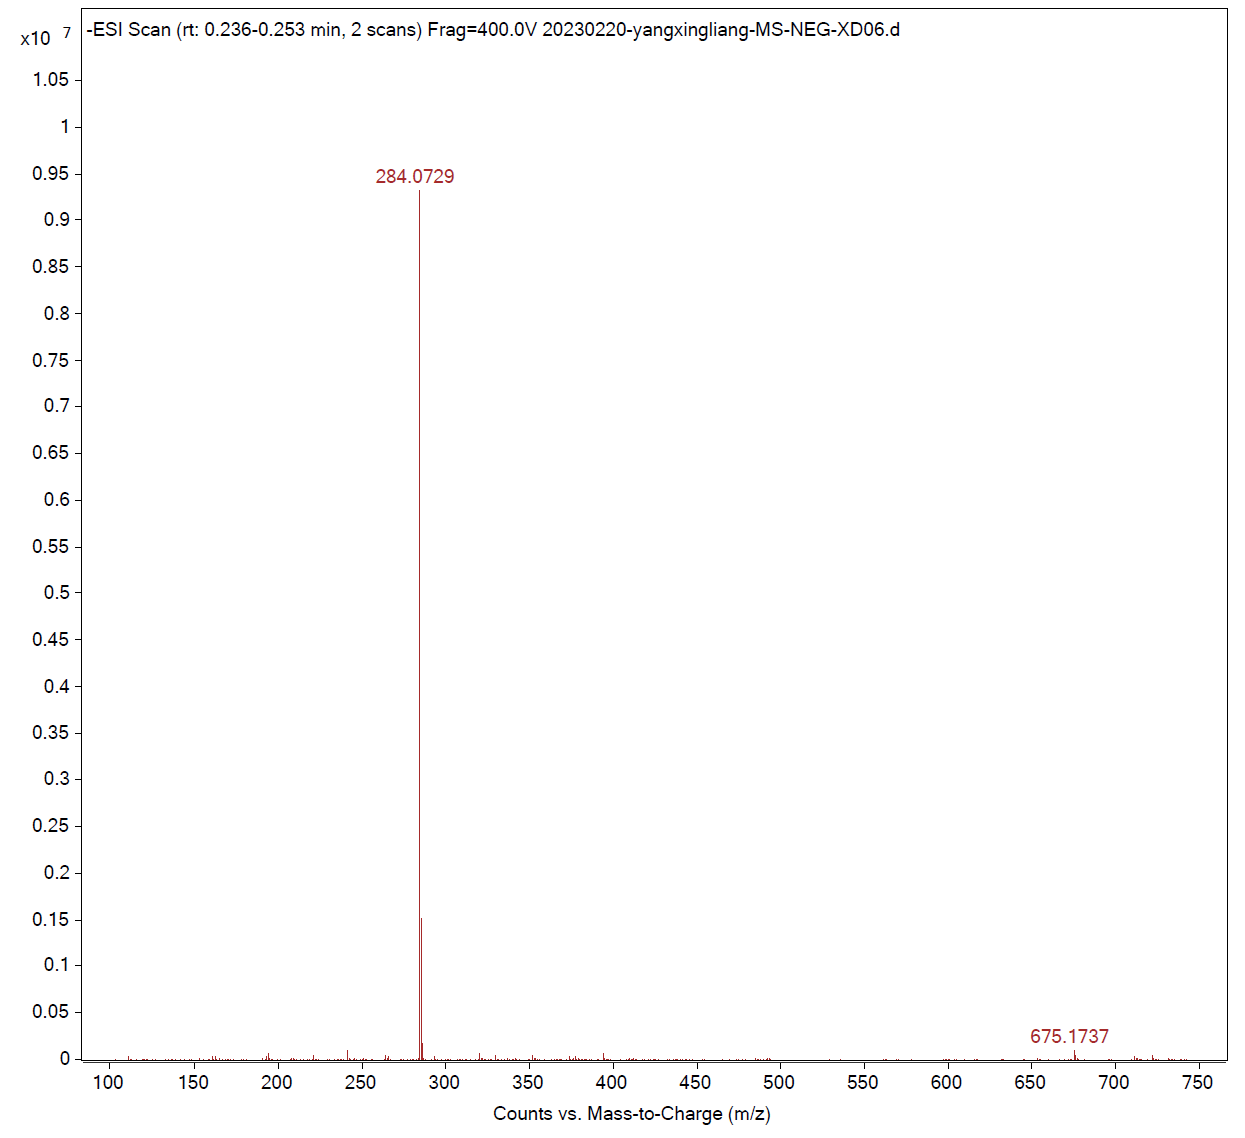


Compound **c3**

1H NMR


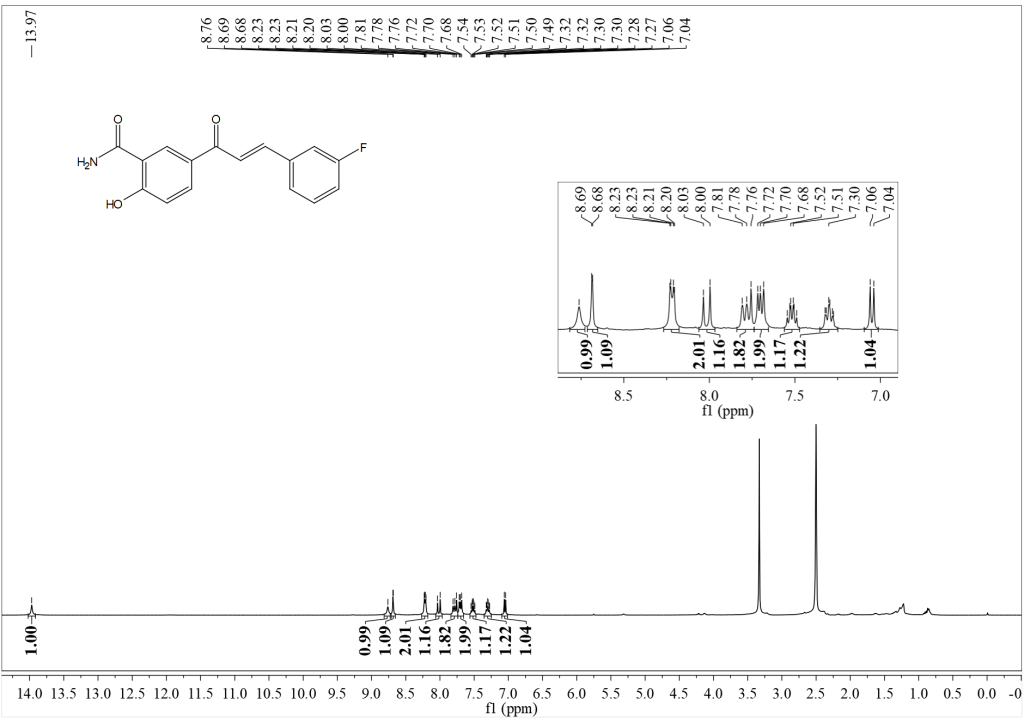


13C NMR


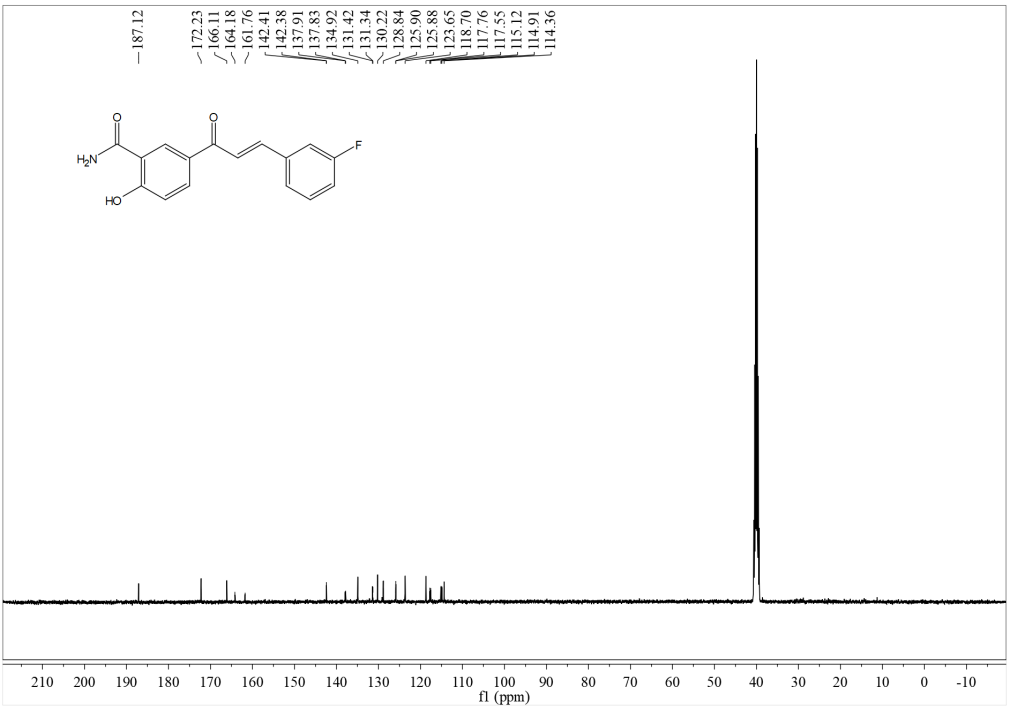


HRMS


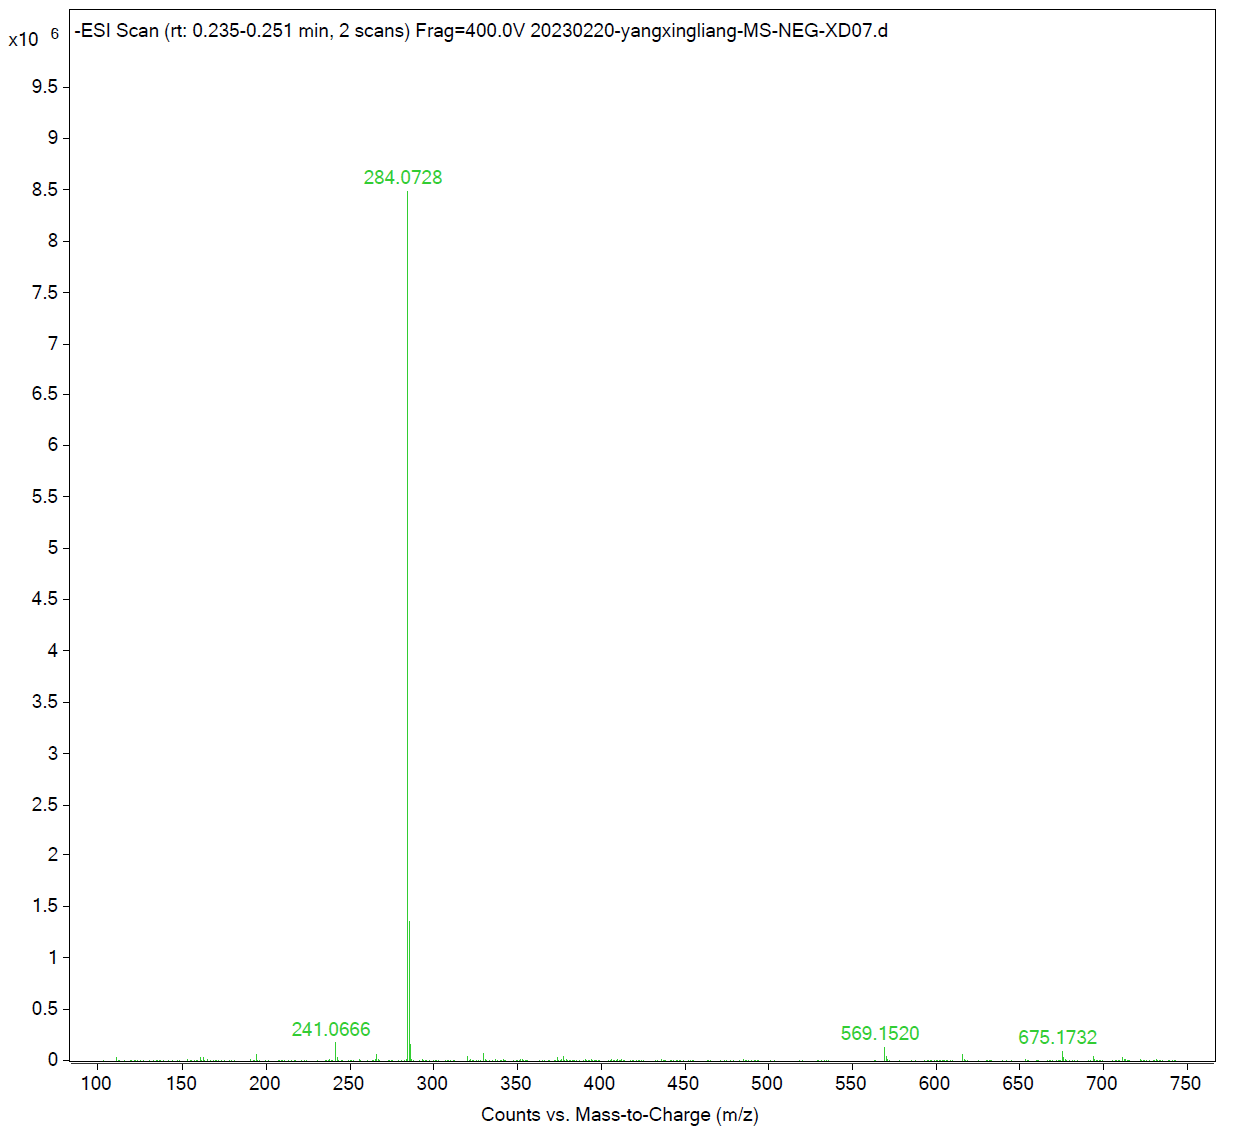


Compound **c4**

1H NMR


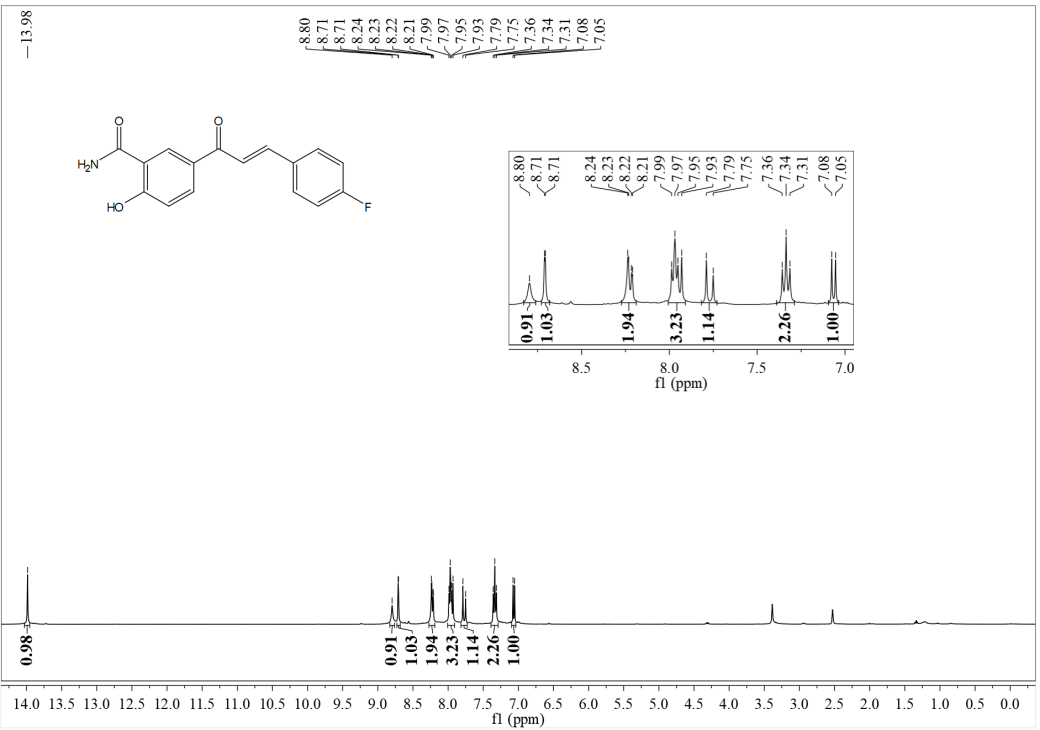


13C NMR


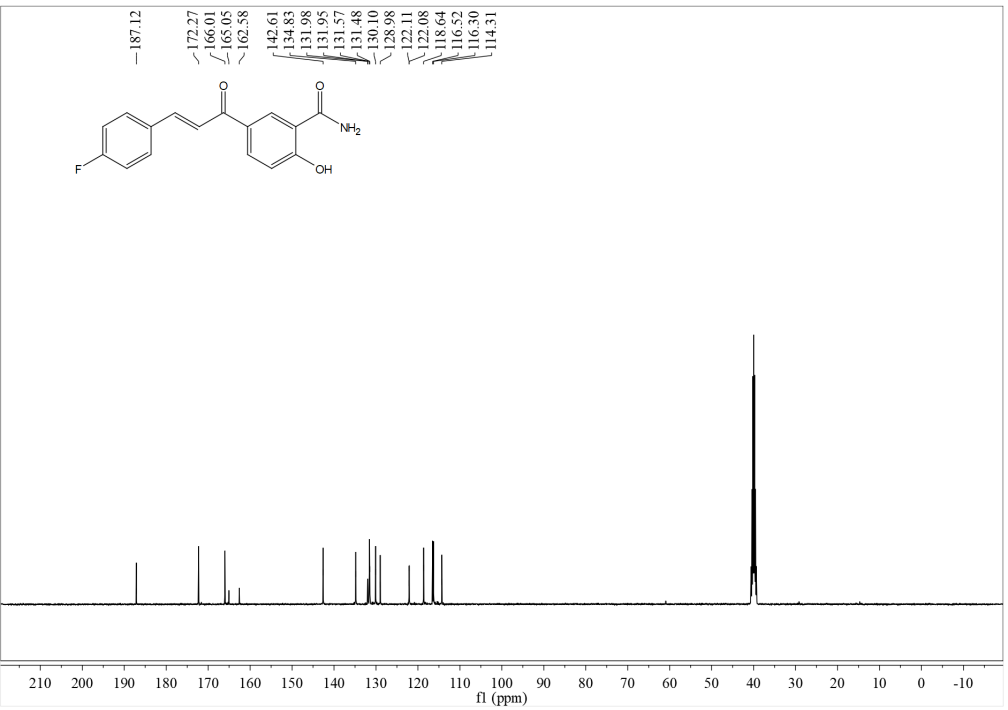


HRMS


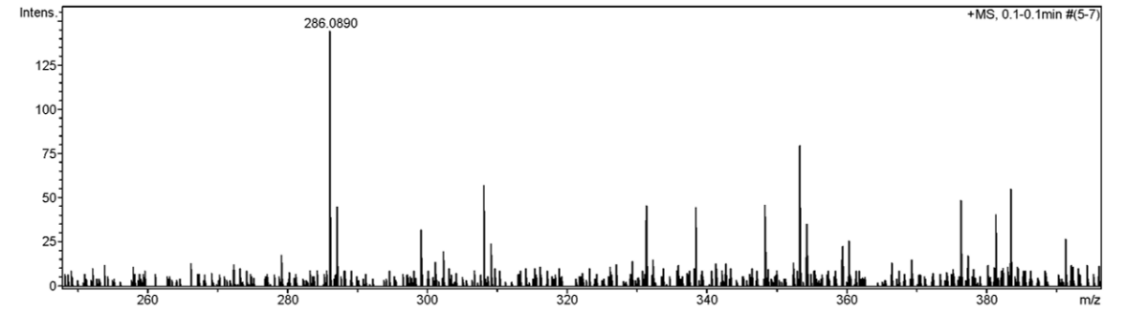


Compound **c5**

1H NMR


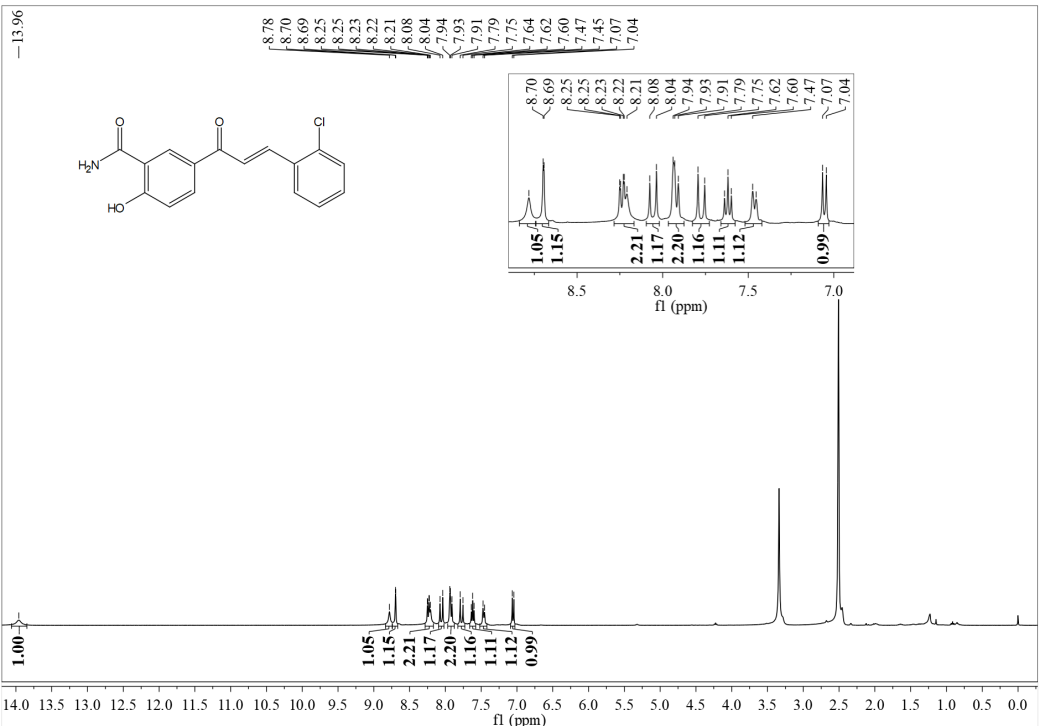


13C NMR


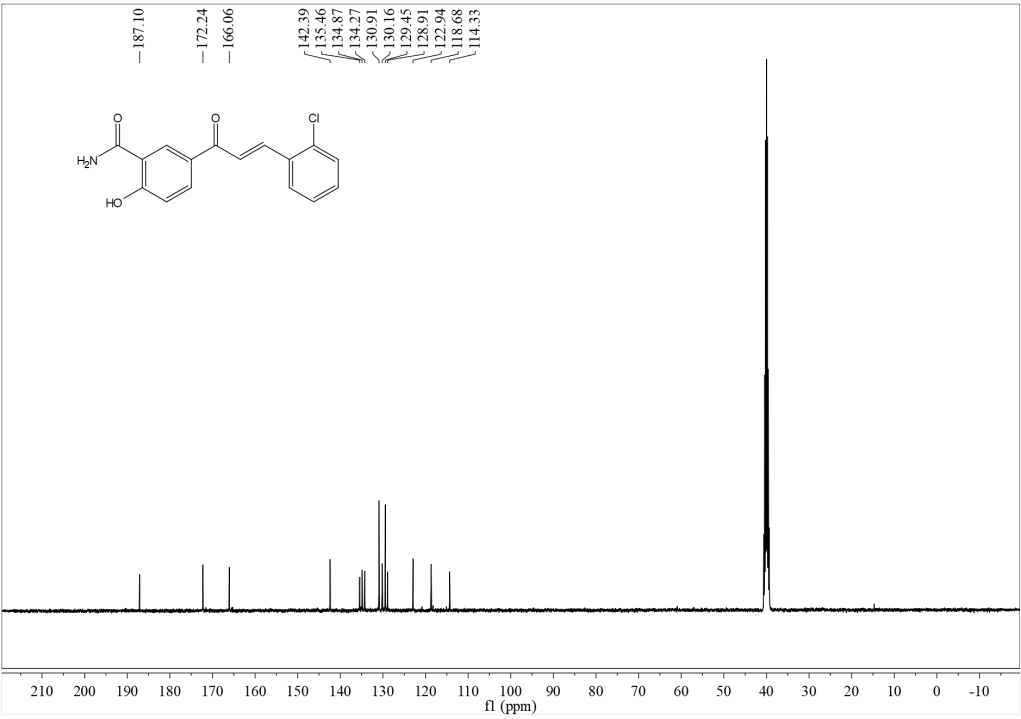


HRMS


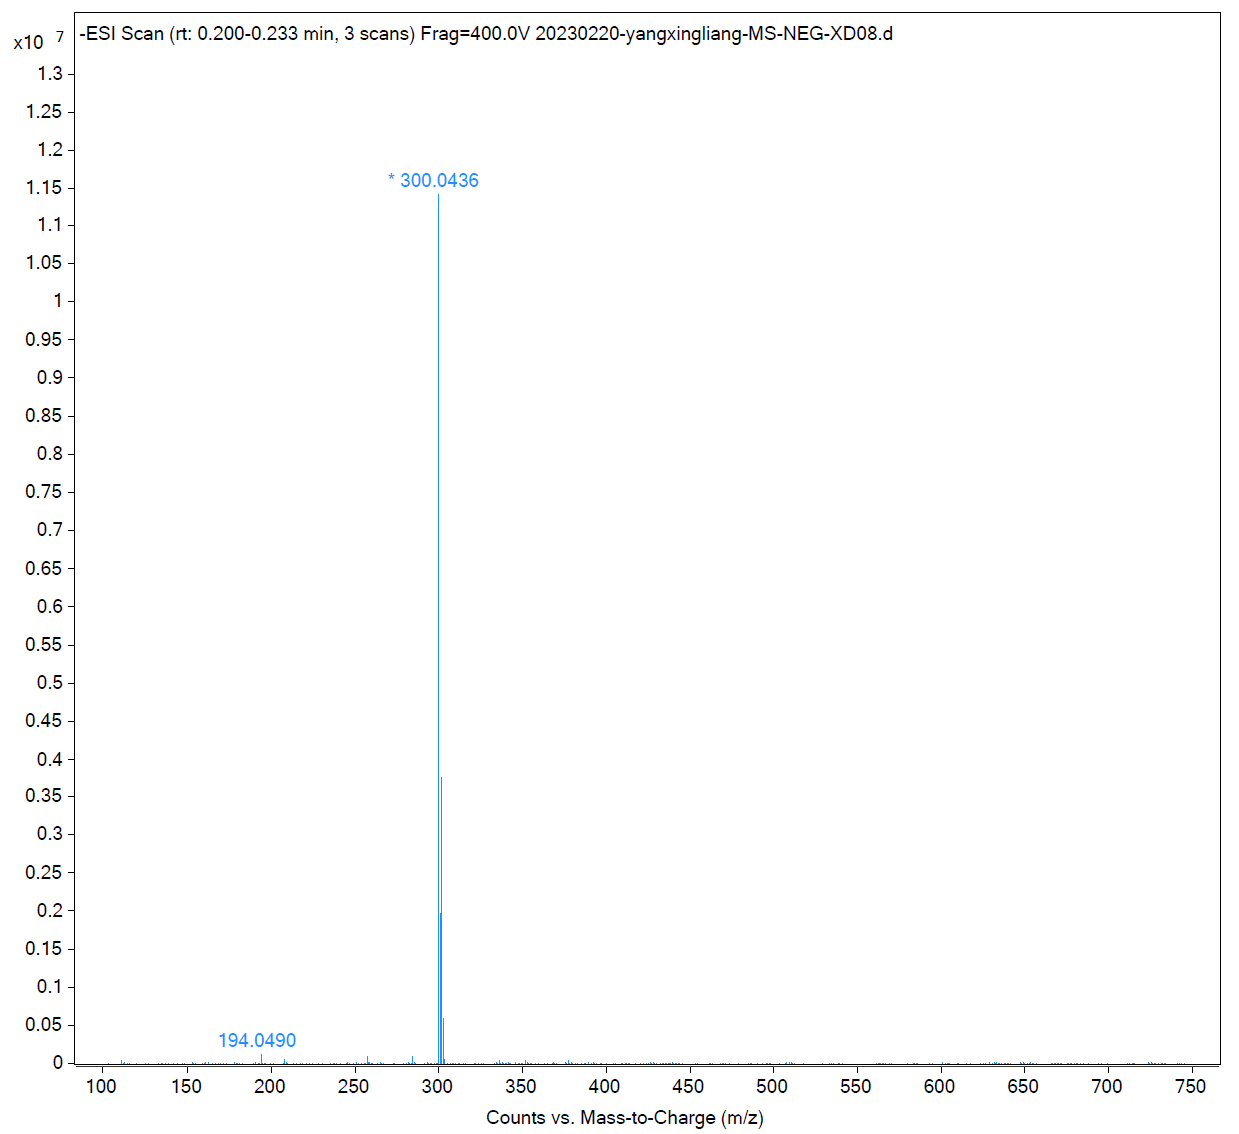


Compound **c6**

1H NMR


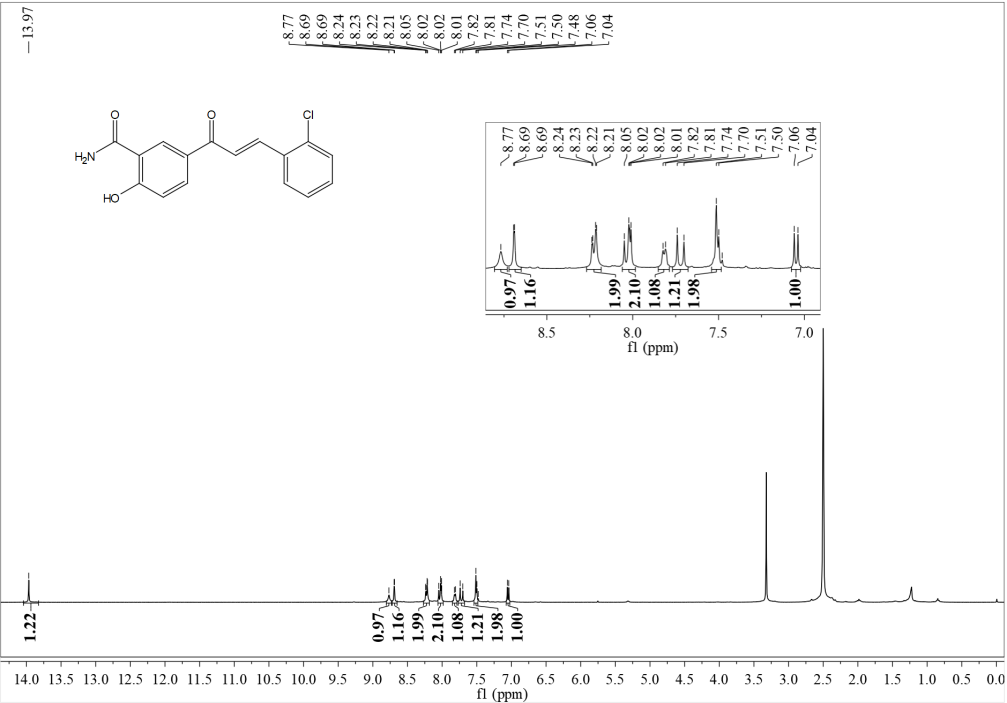


13C NMR


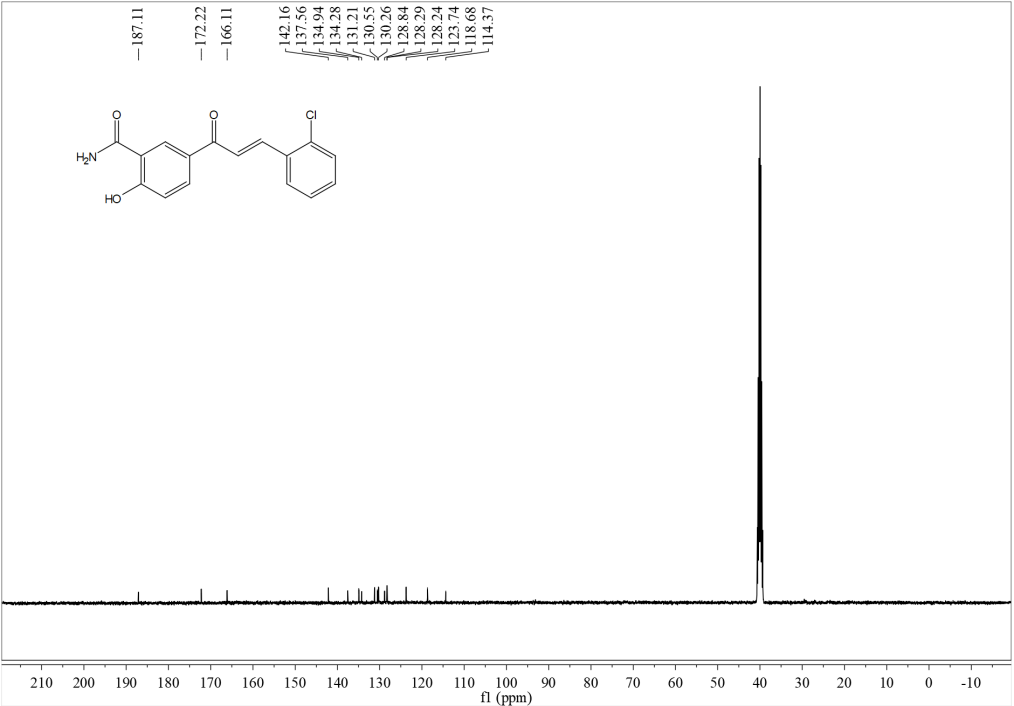


HRMS


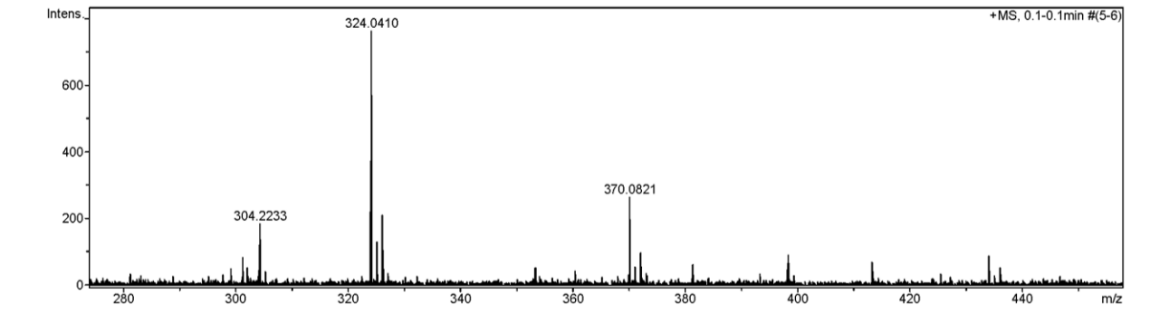


Compound **c7**

1H NMR


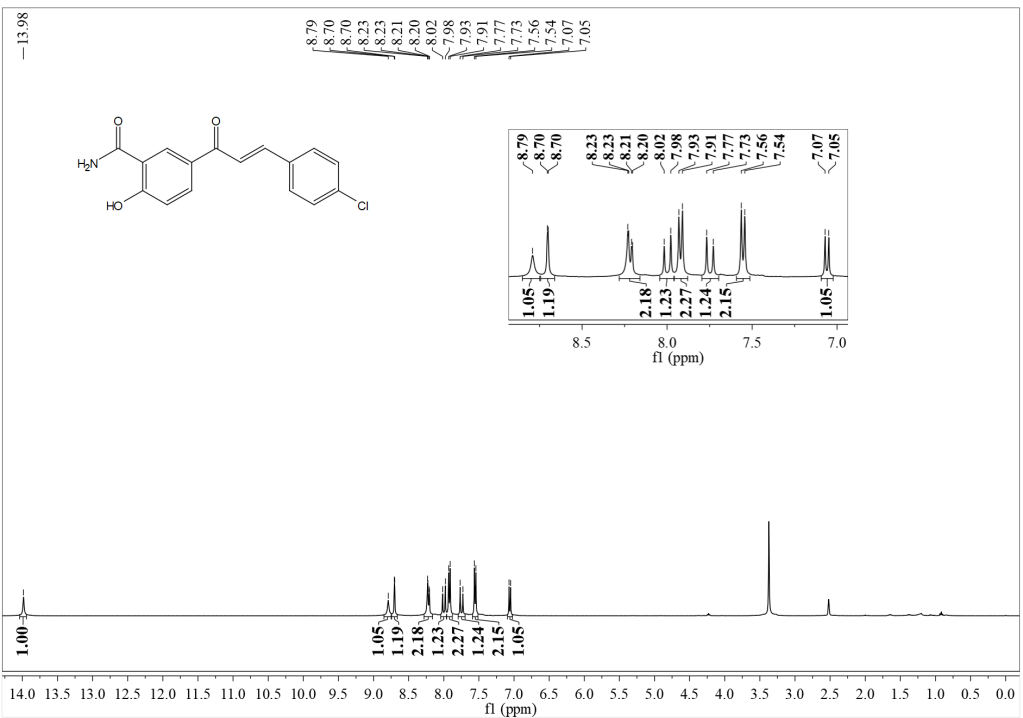


13C NMR


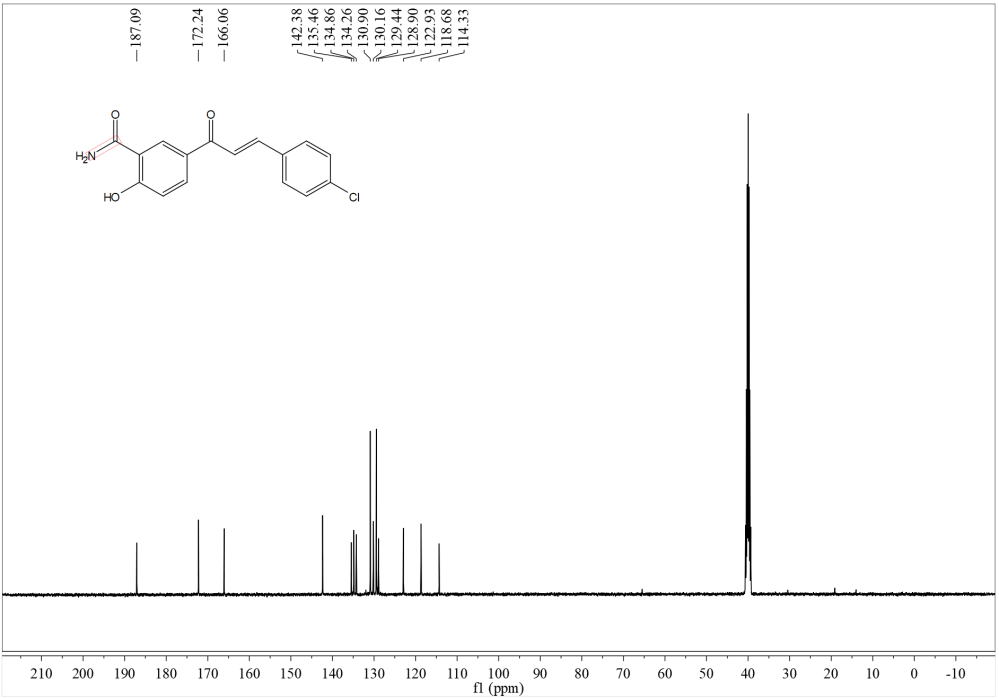


HRMS


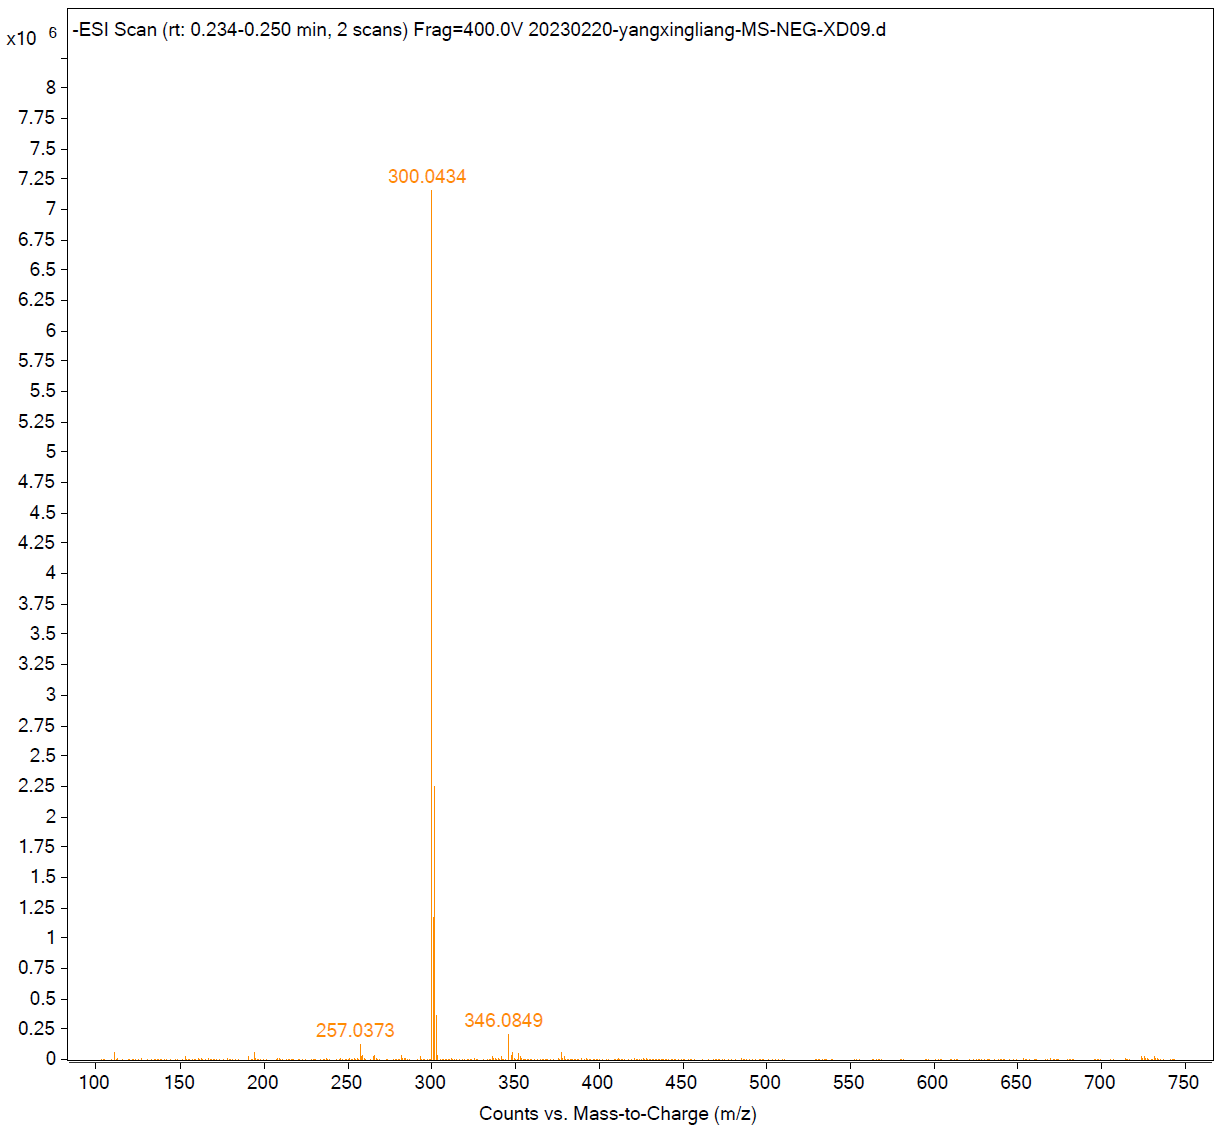


Compound **c8**

1H NMR


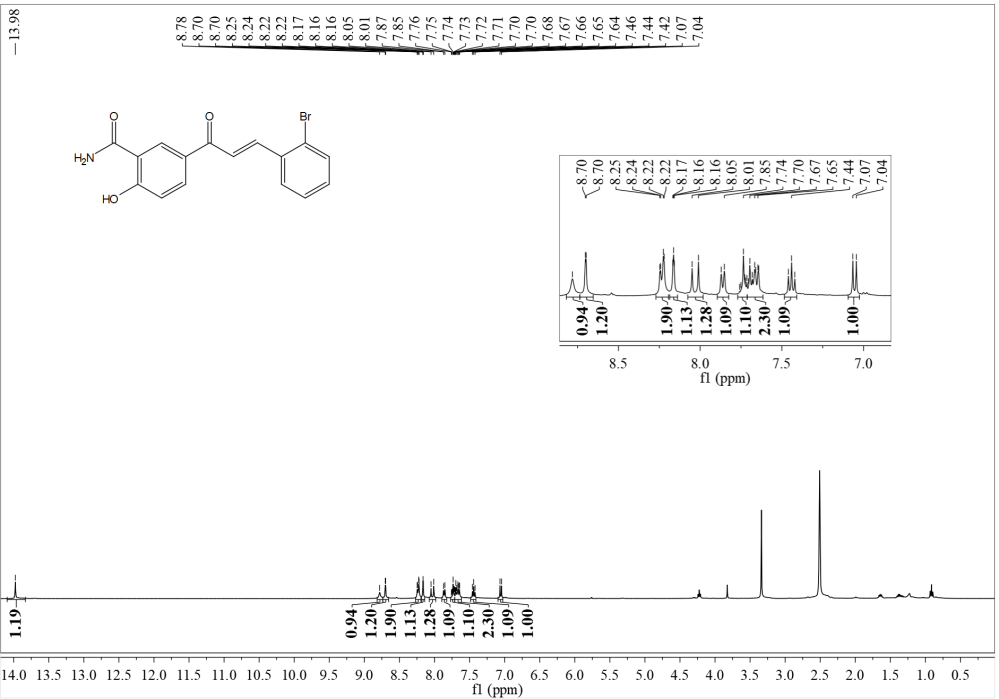


13C NMR


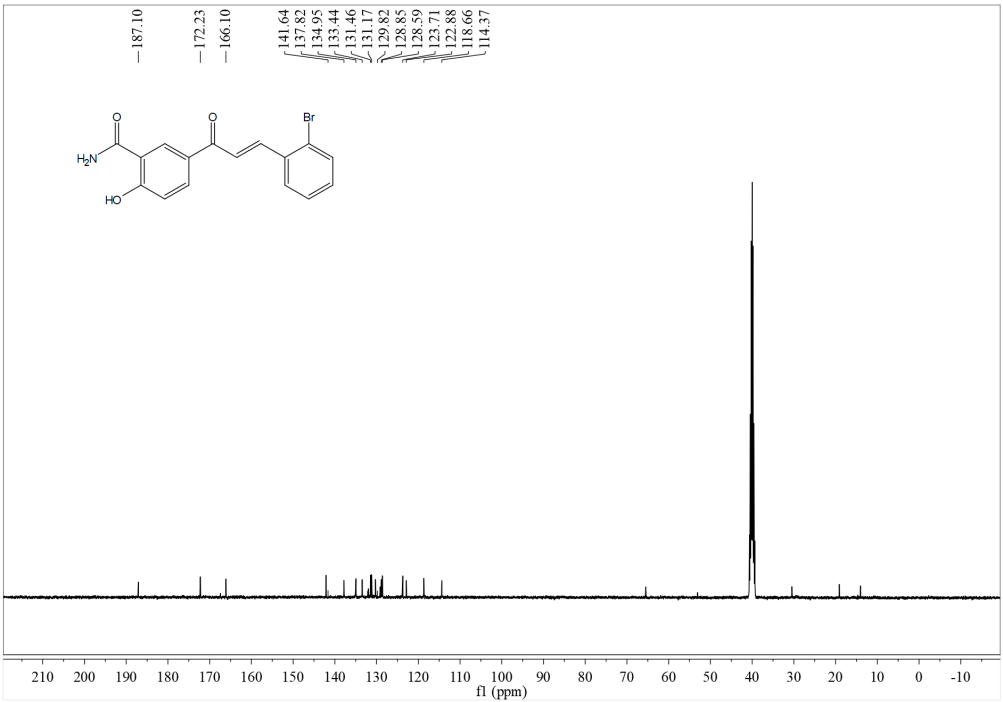


HRMS


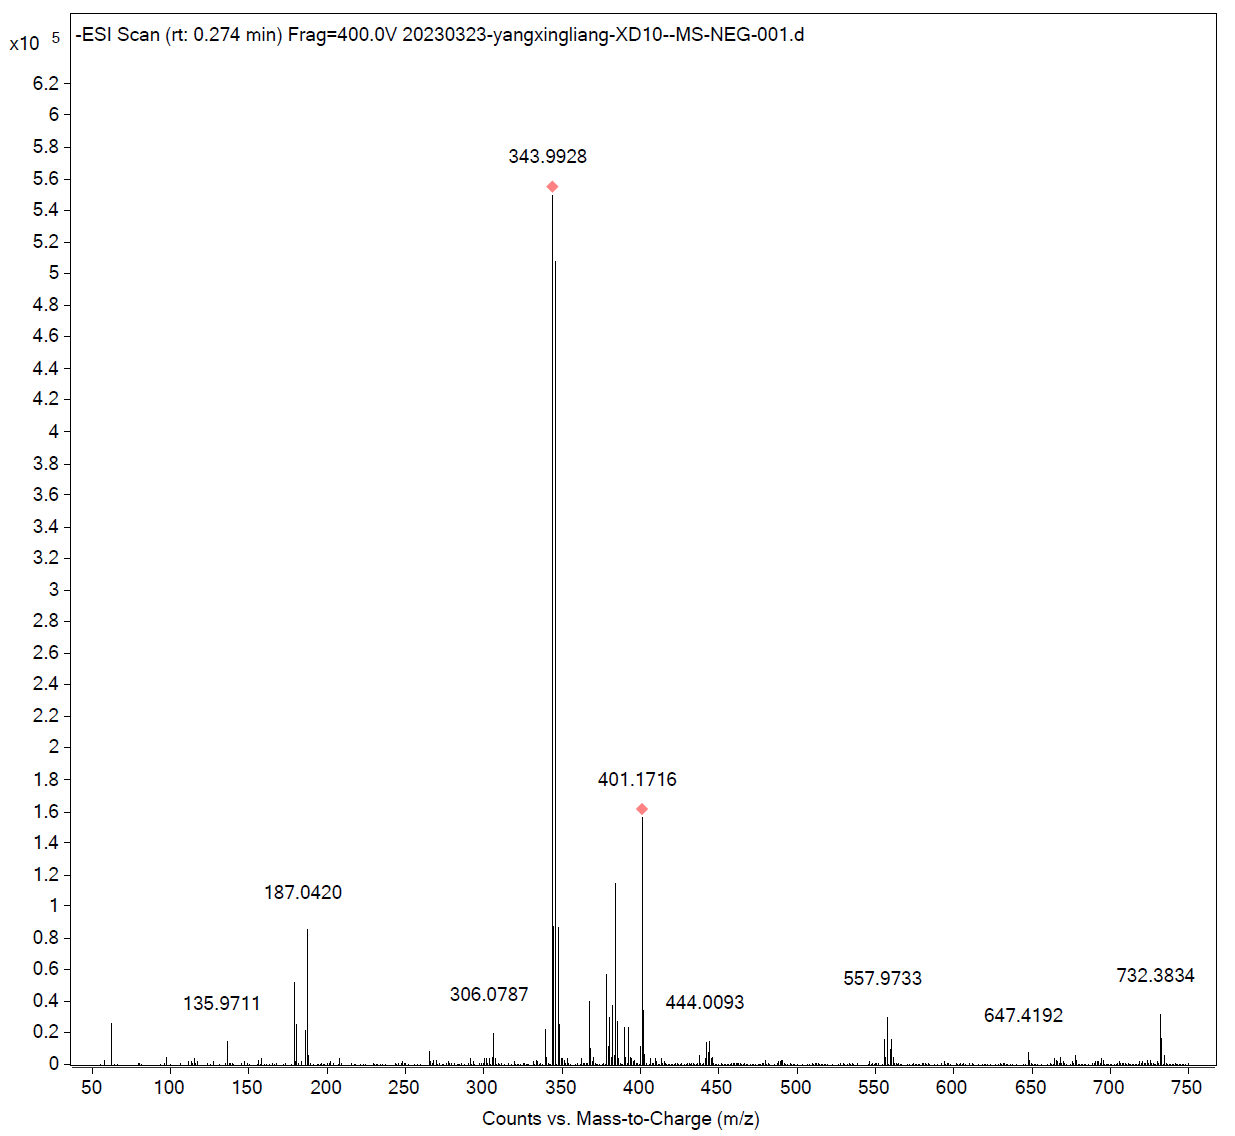


Compound **c9**

1H NMR


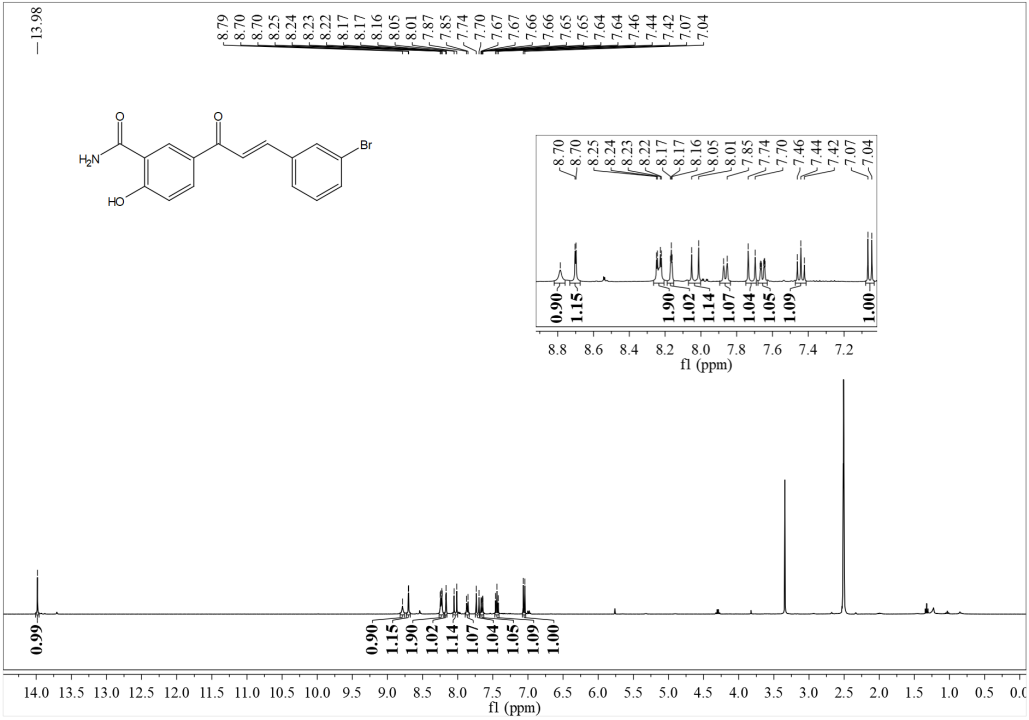


13C NMR


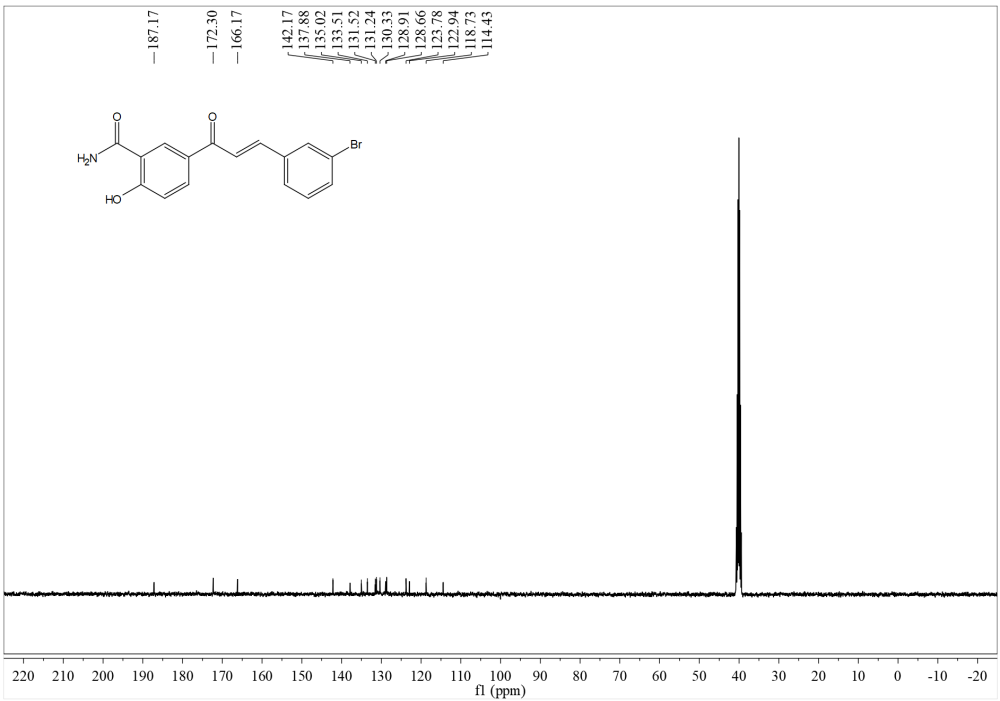


HRMS


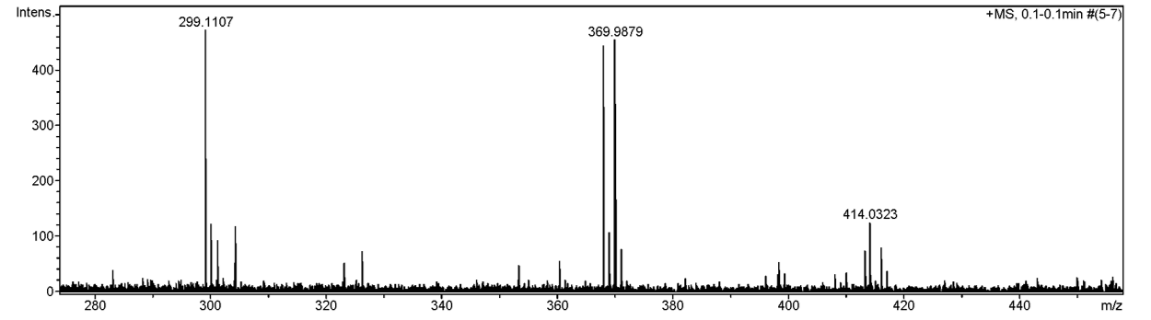


Compound **c10**

1H NMR


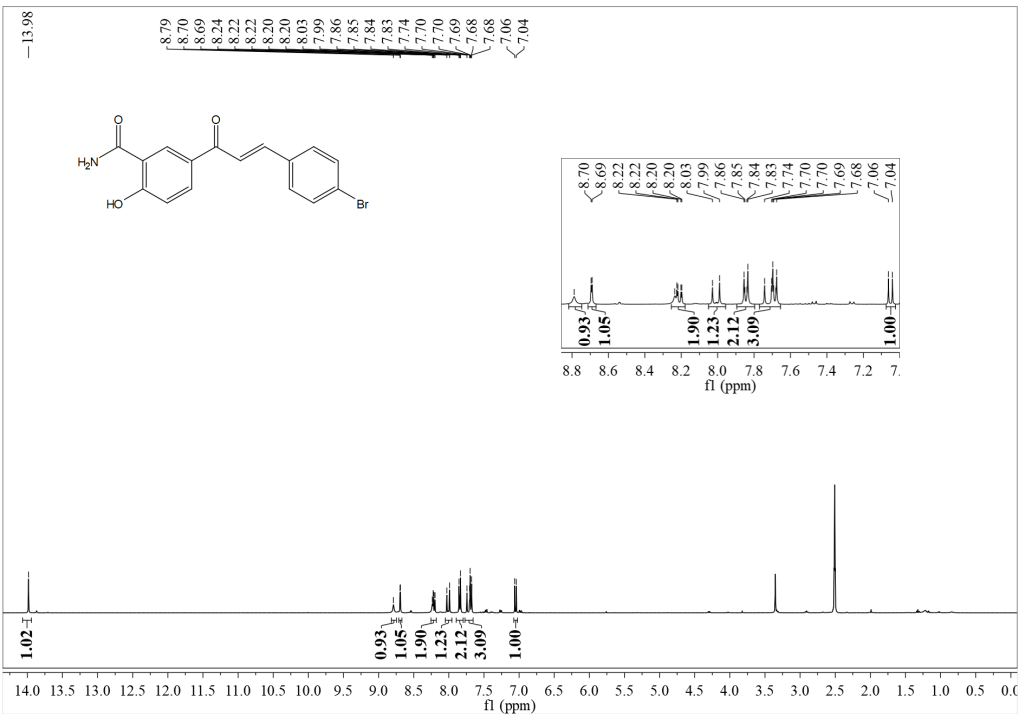


13C NMR


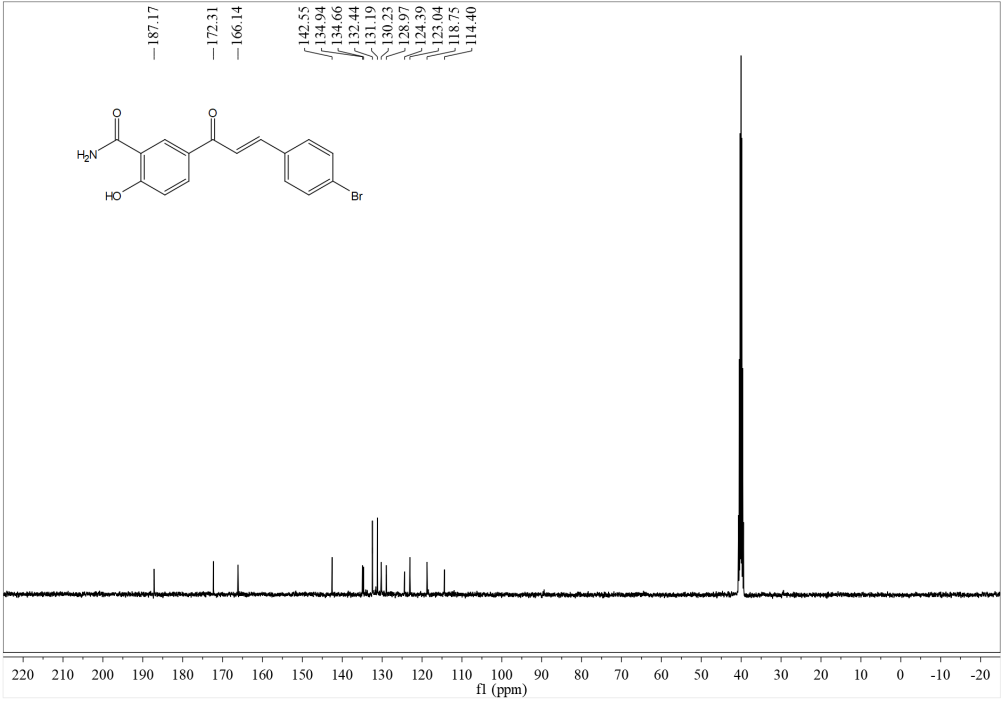


HRMS


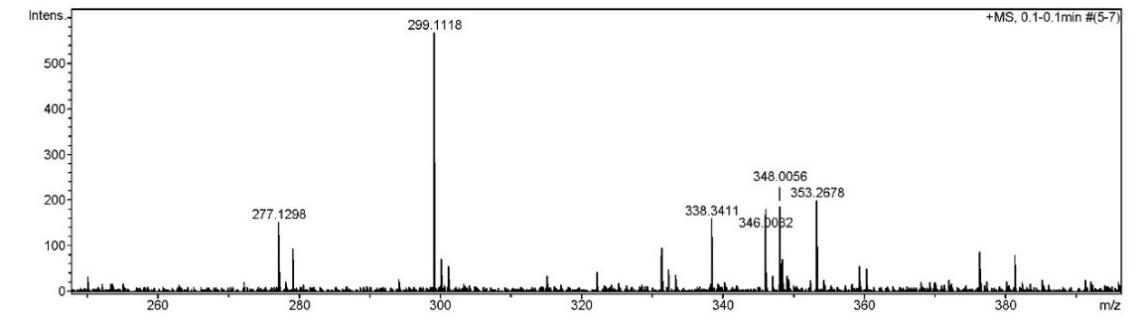


Compound **c11**

1H NMR


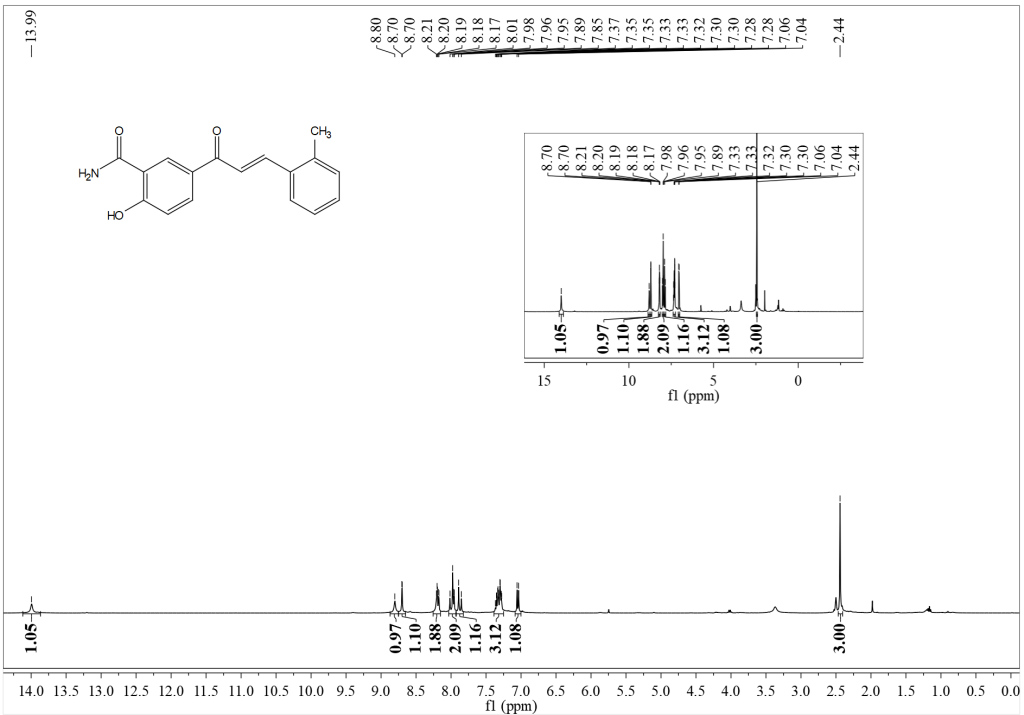


13C NMR


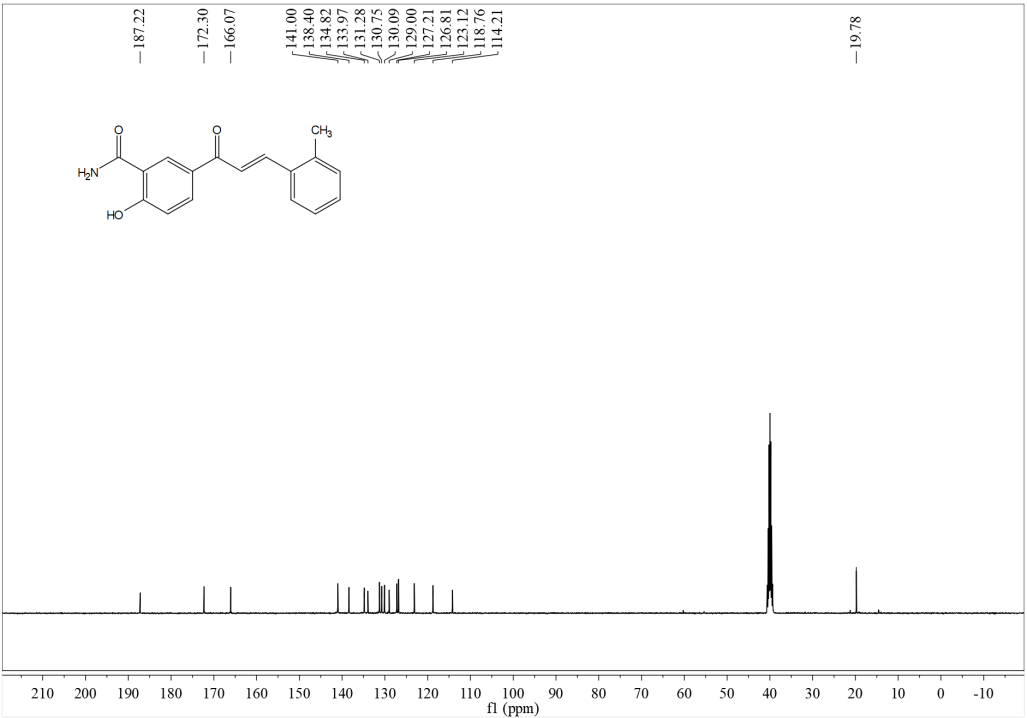


HRMS


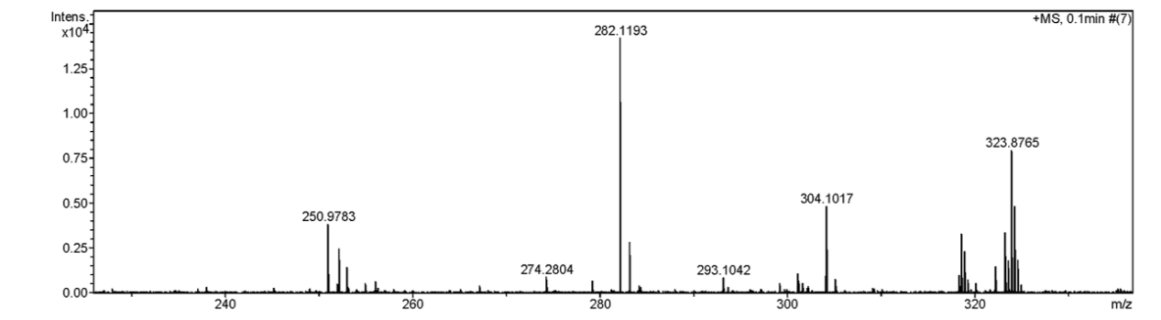


Compound **c12**

1H NMR


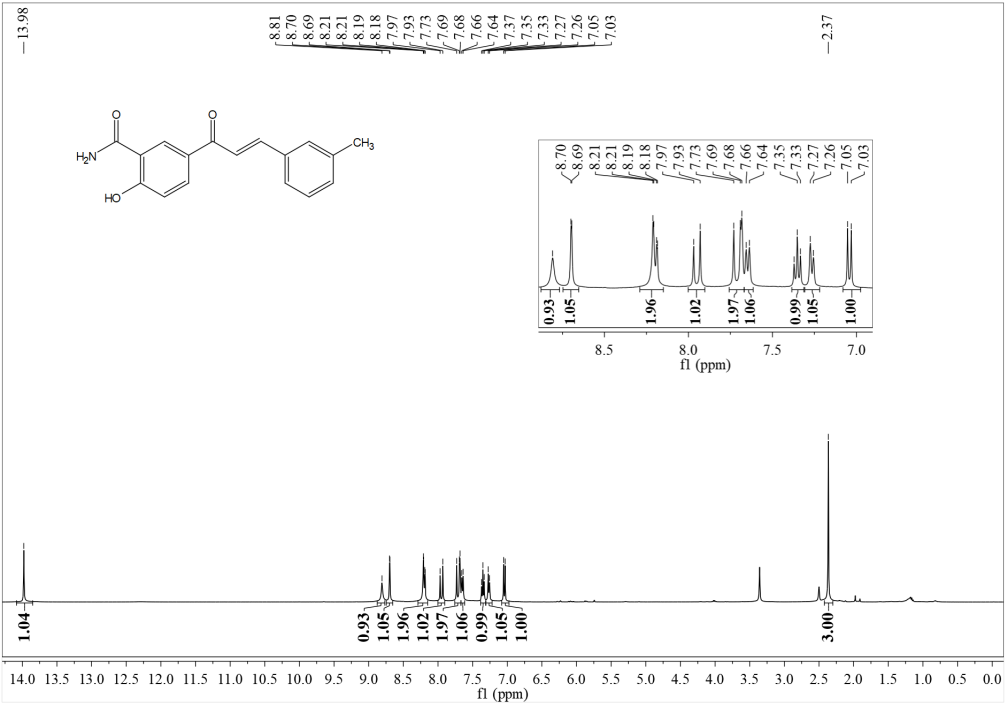


13C NMR


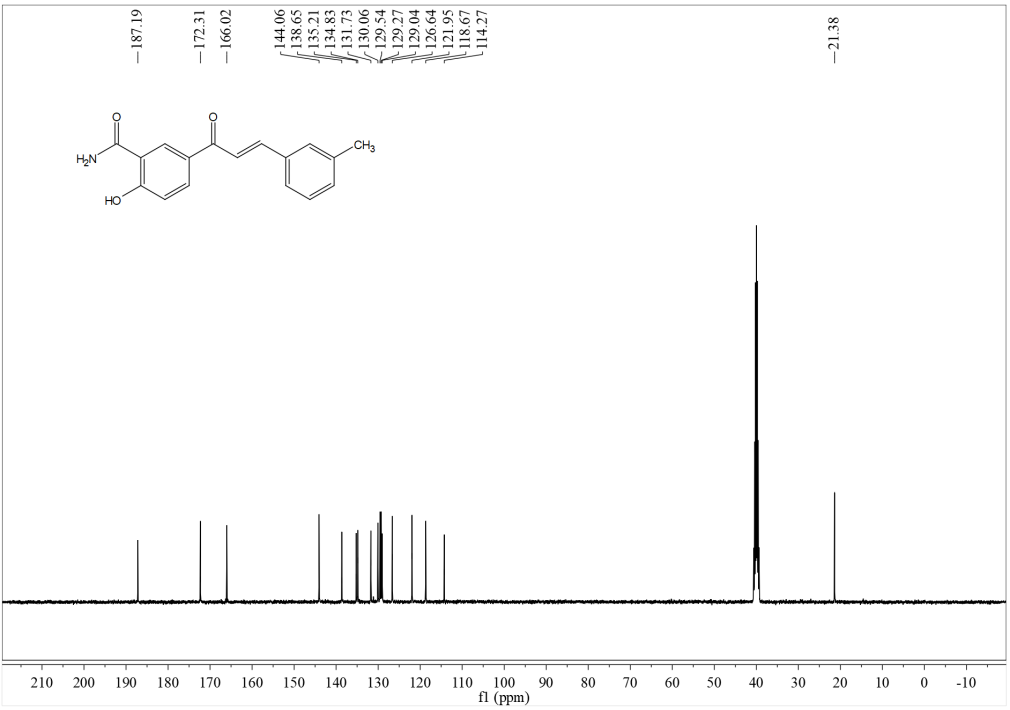


HRMS


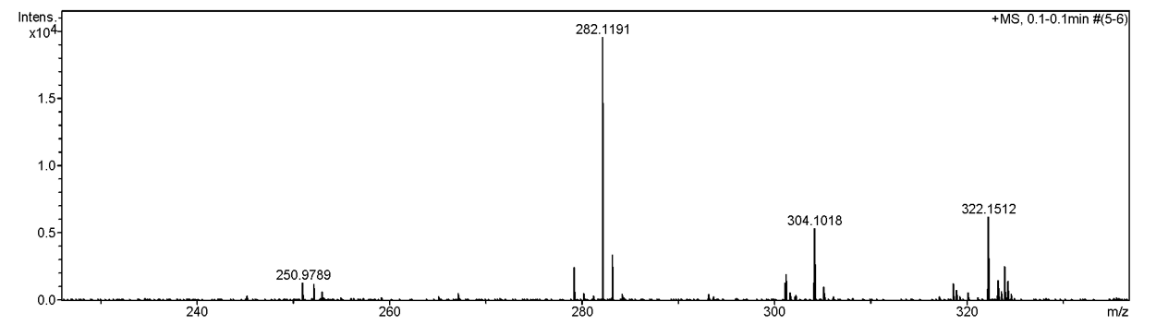


Compound **c13**

1H NMR


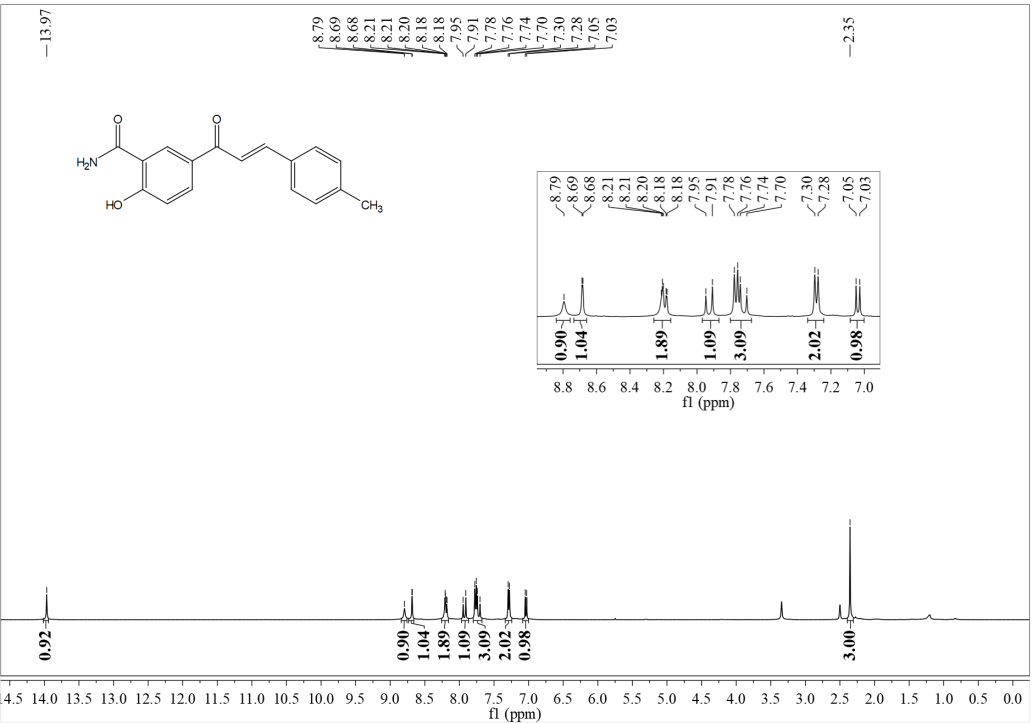


13C NMR


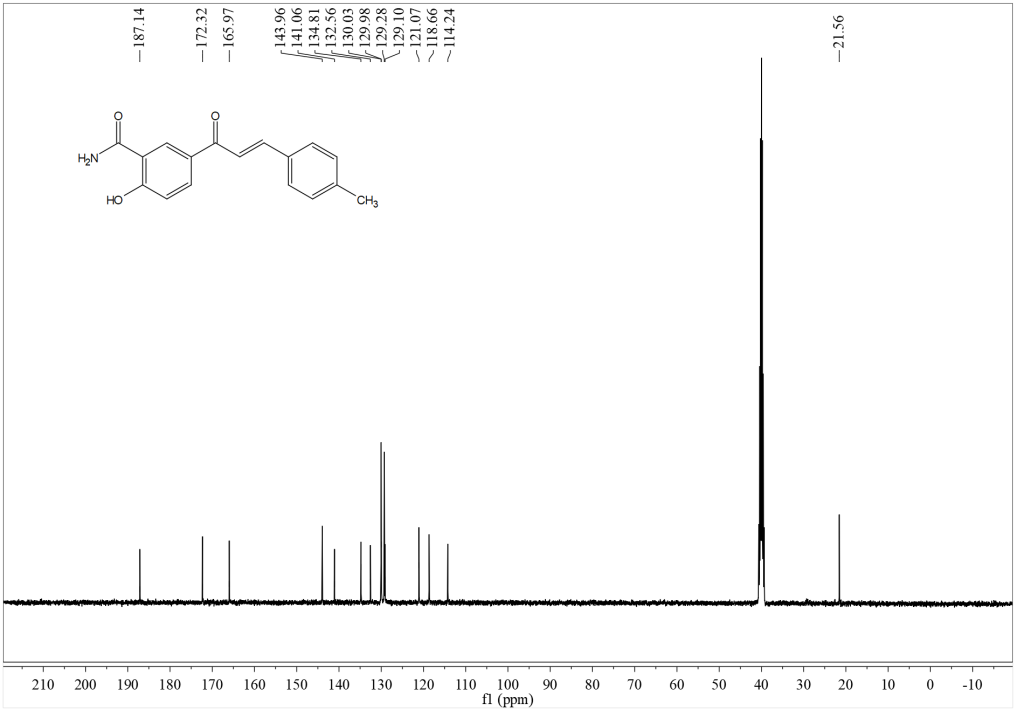


HRMS


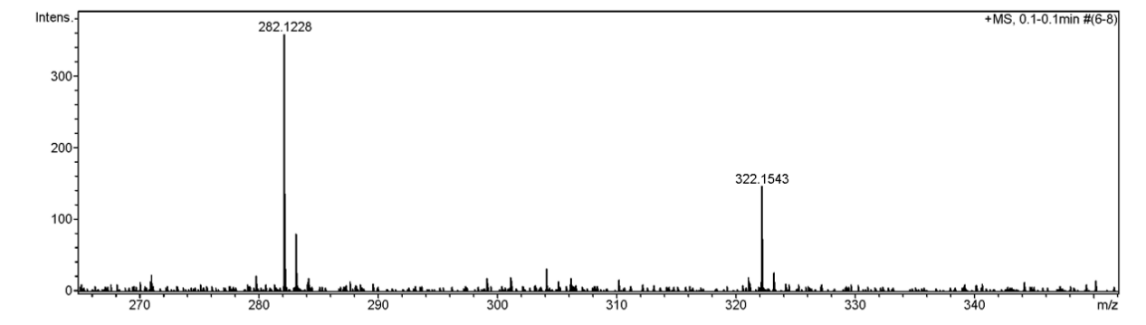


Compound **c14**

1H NMR


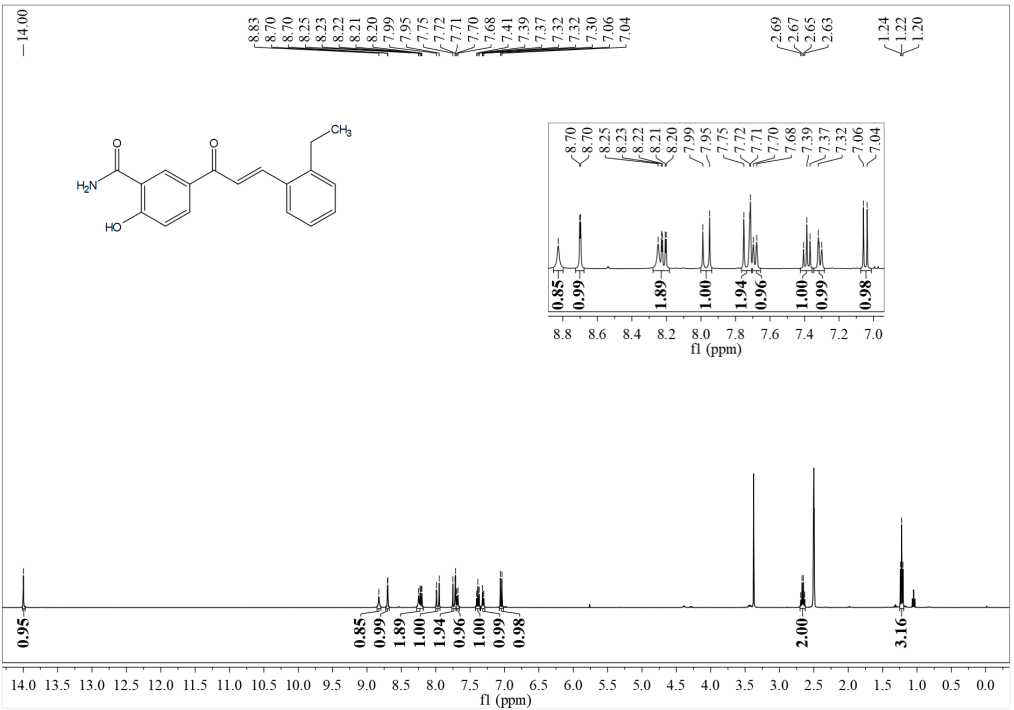


13C NMR


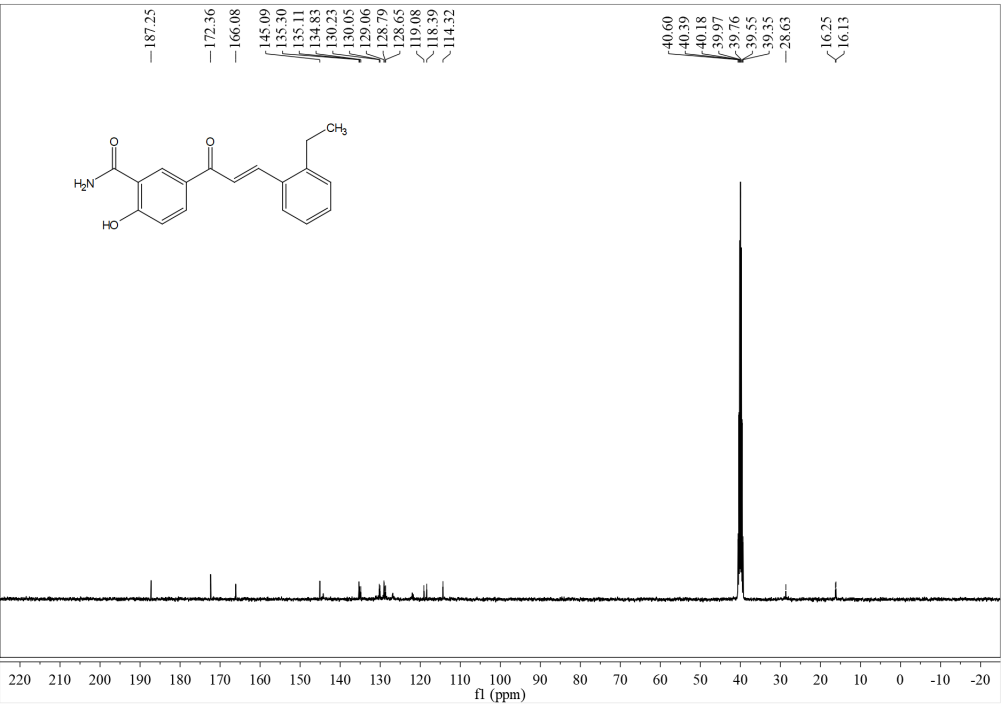


HRMS


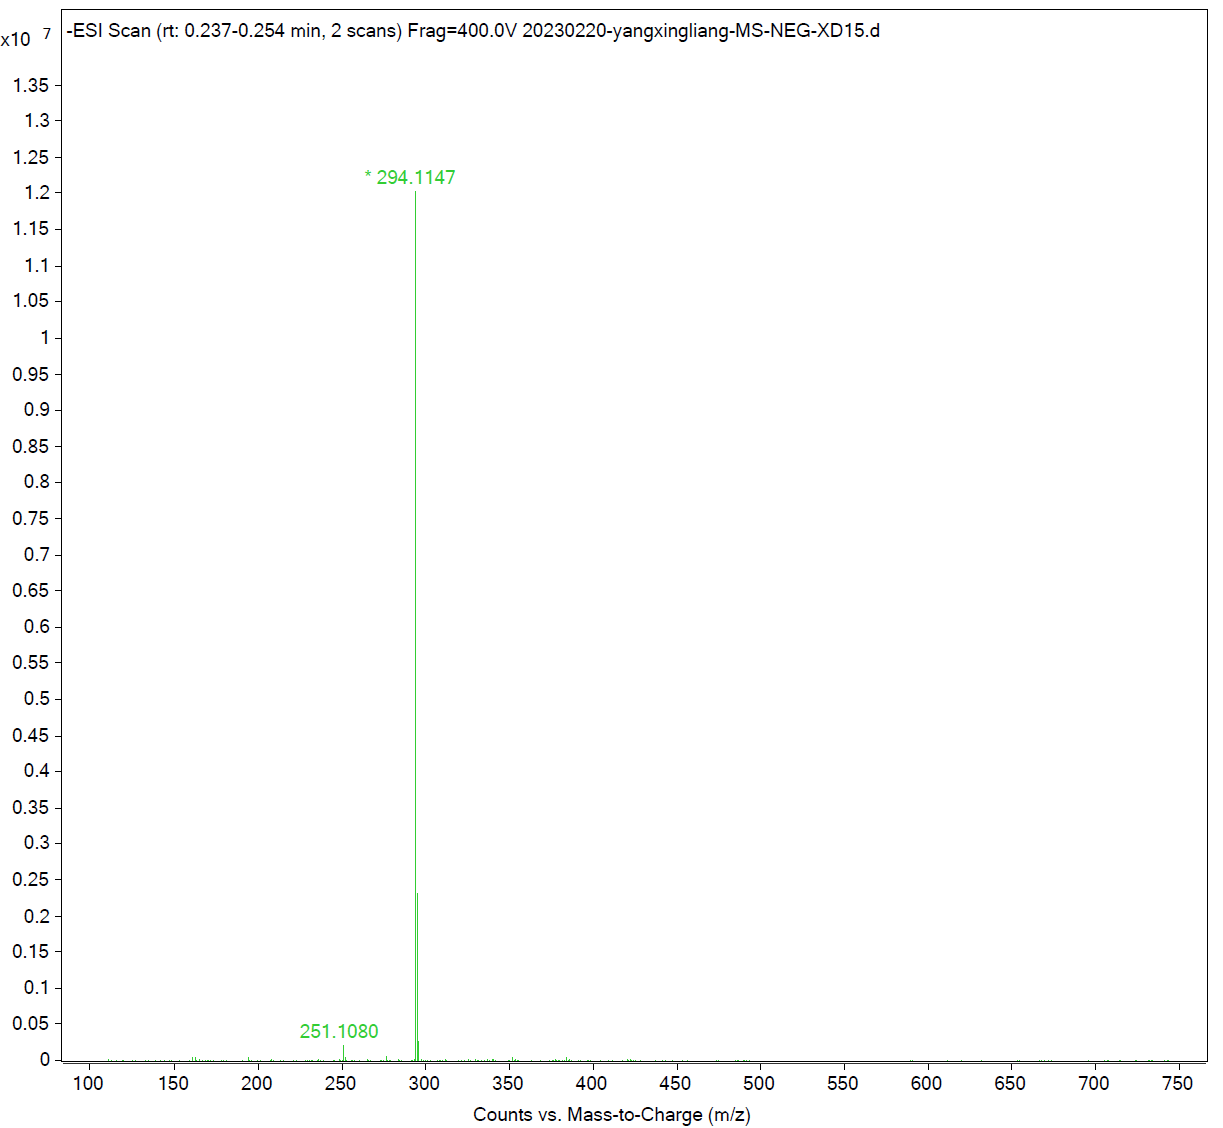


Compound **c15**

1H NMR


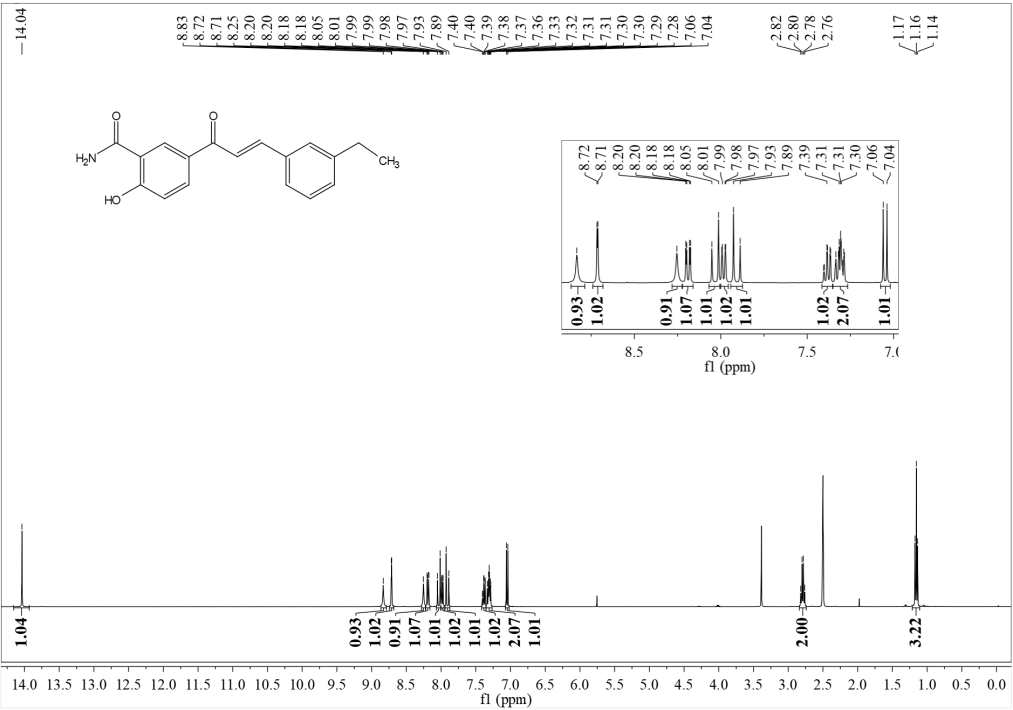


13C NMR


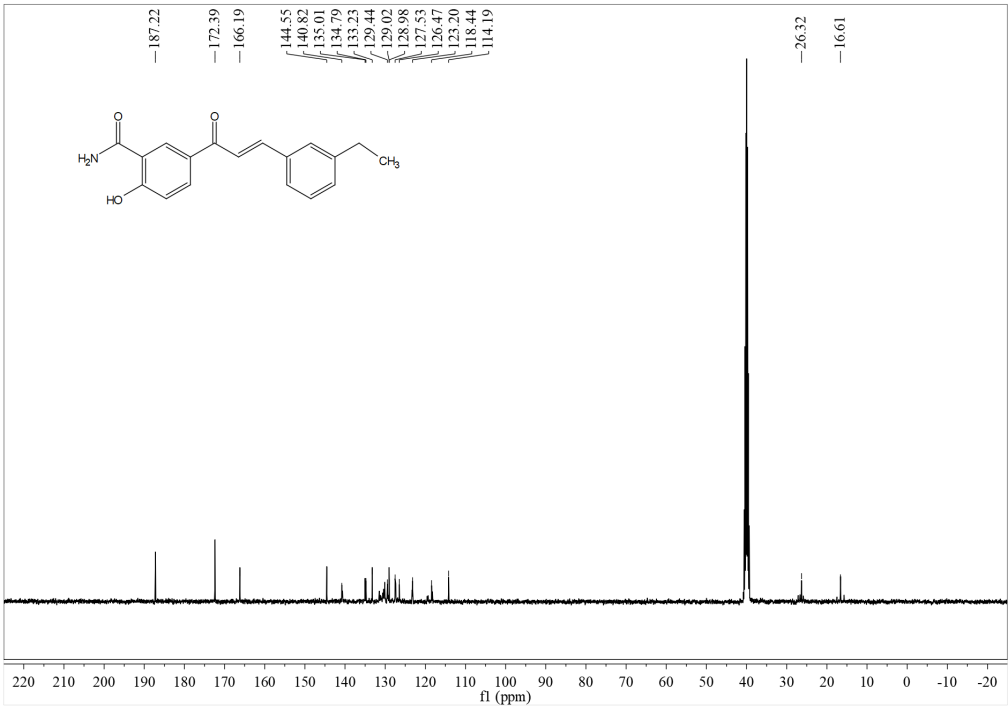


HRMS


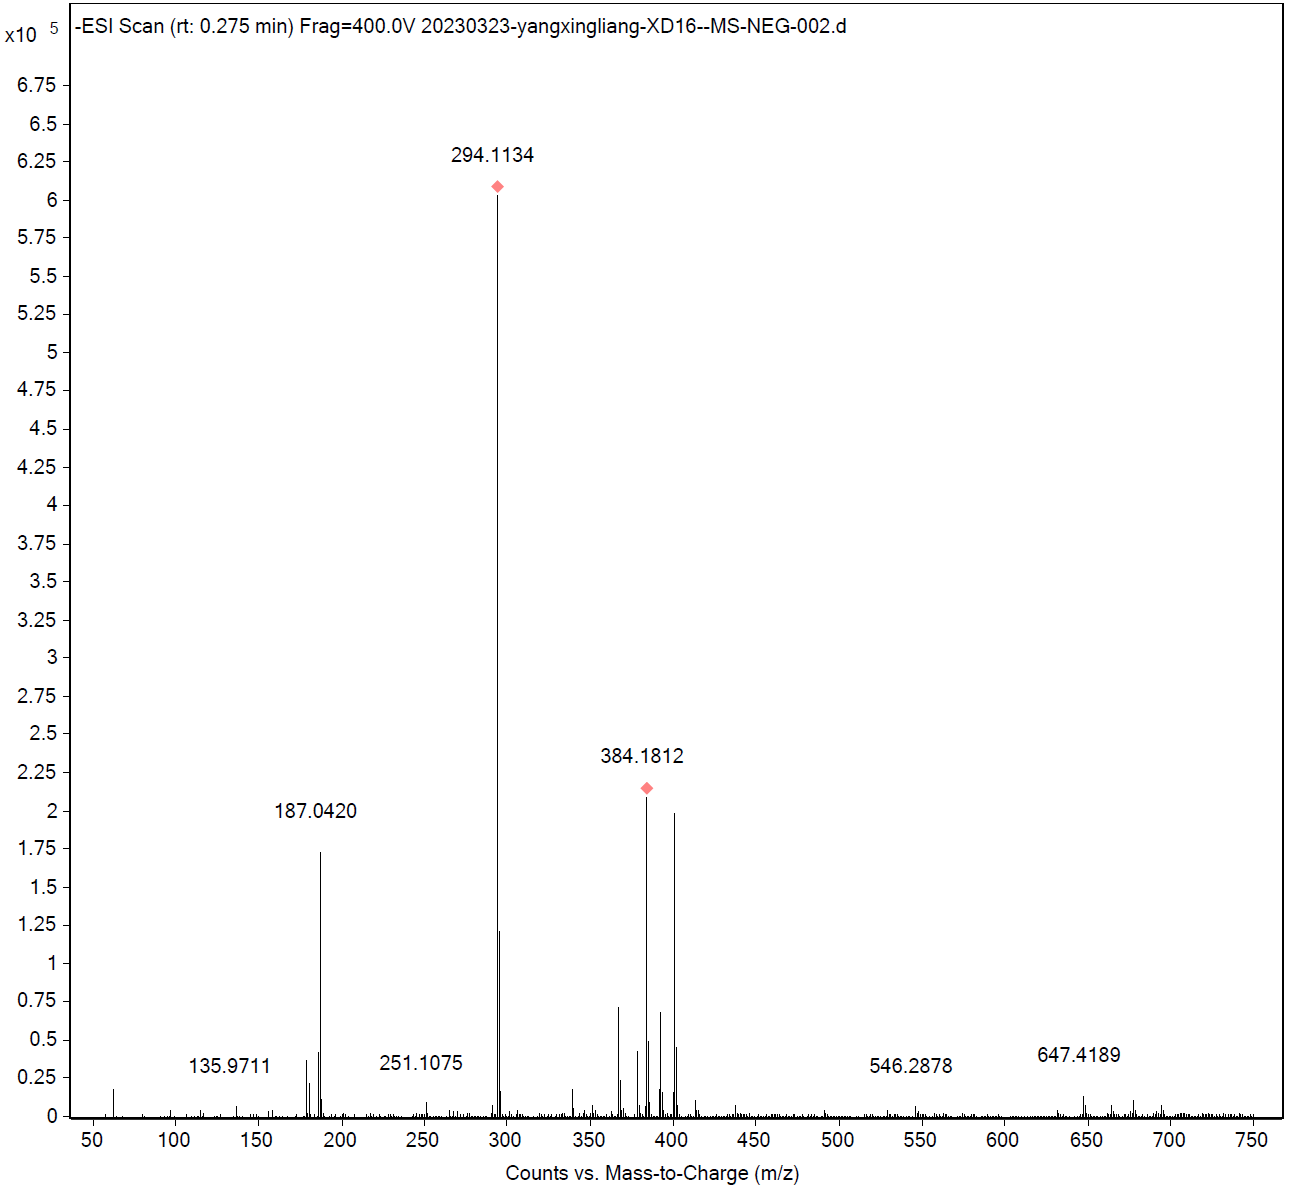


Compound **c16**

1H NMR


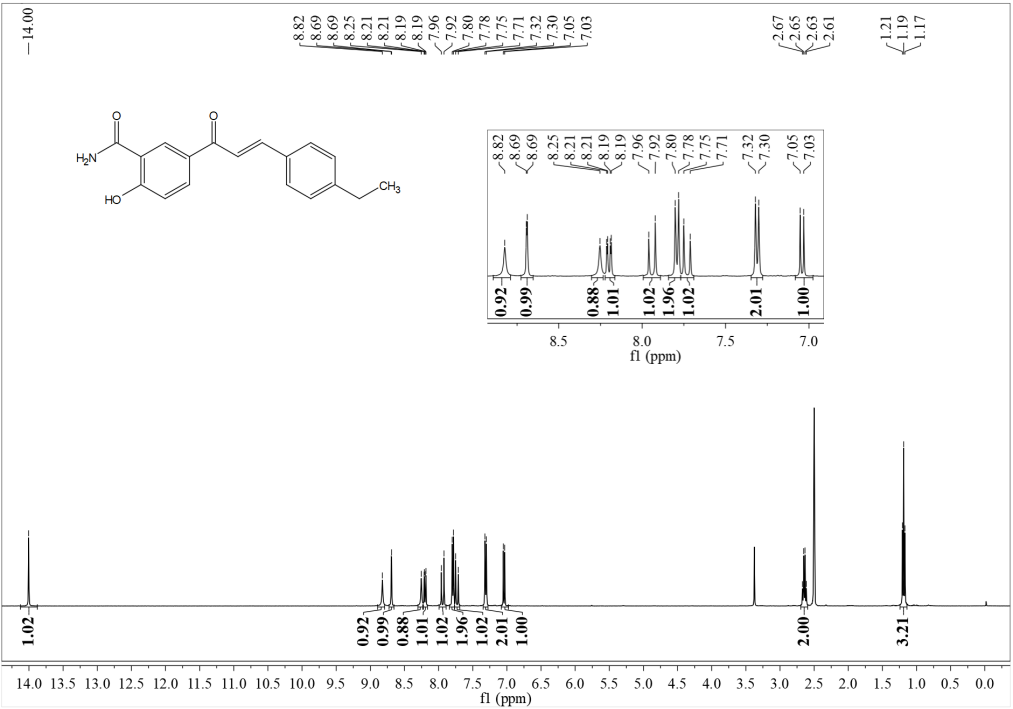


13C NMR


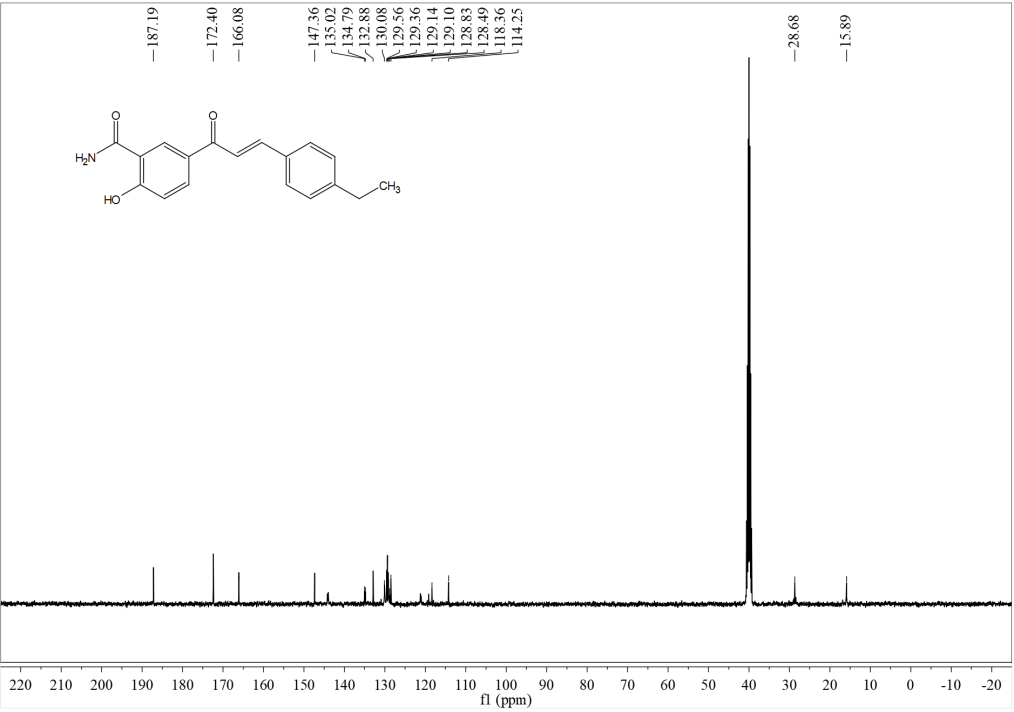


HRMS


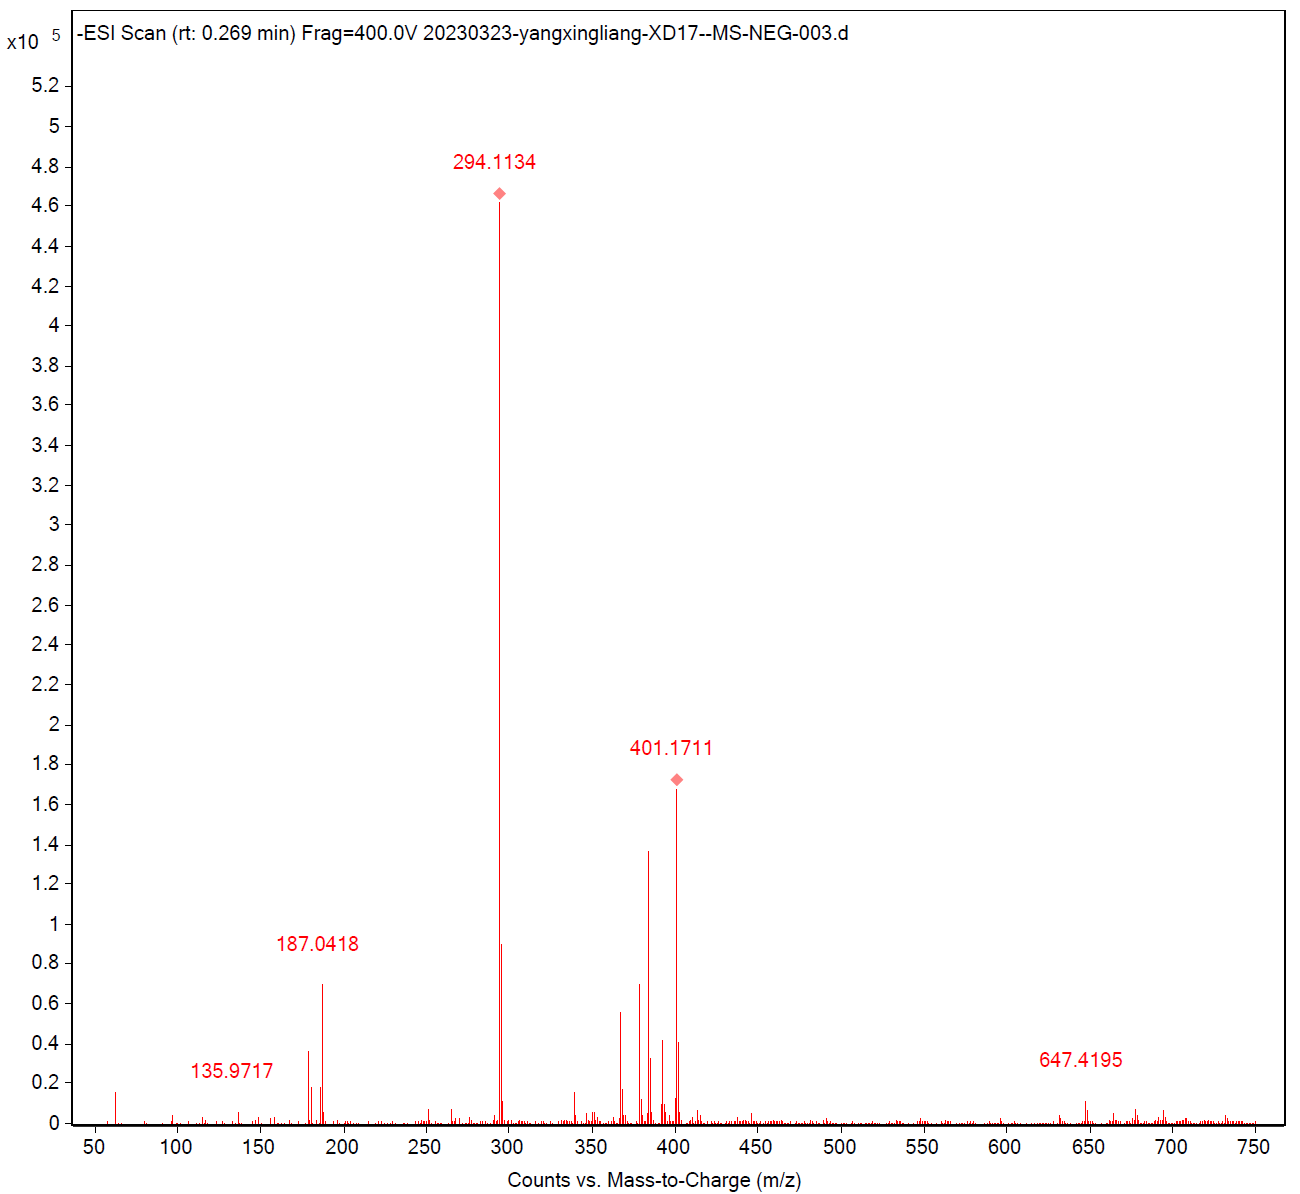


Compound **c17**

1H NMR


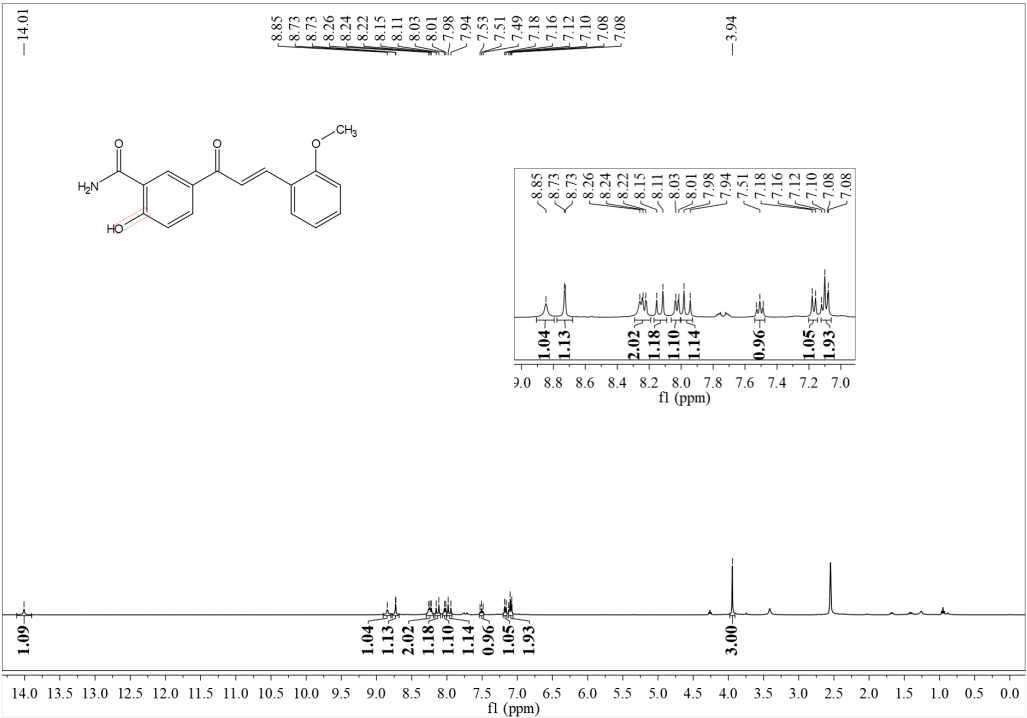


13C NMR


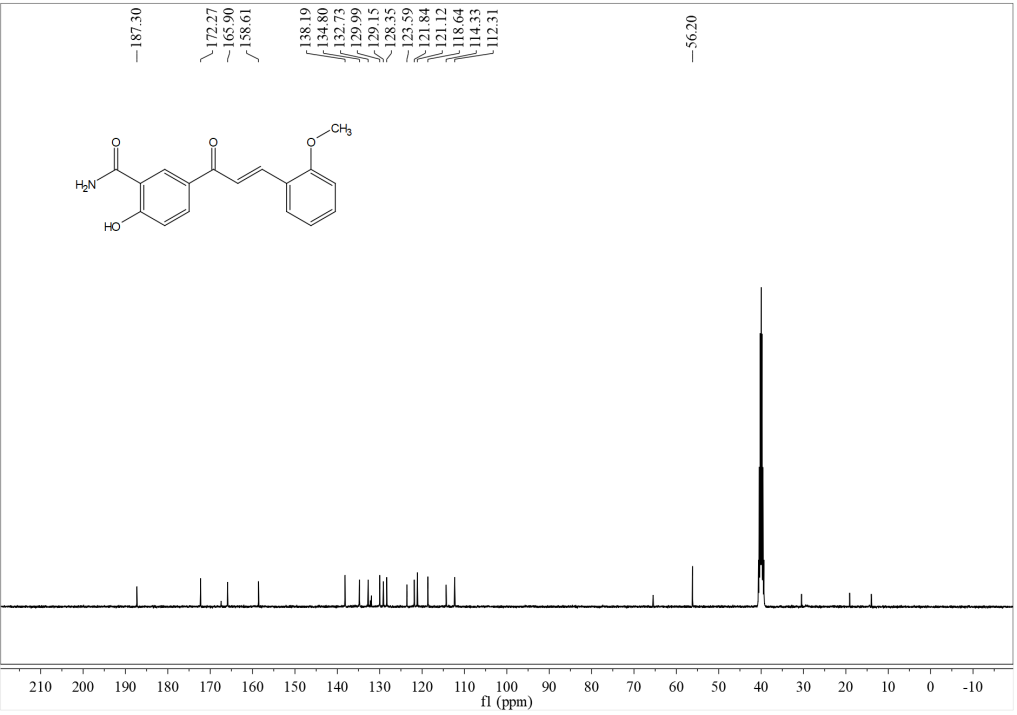


HRMS


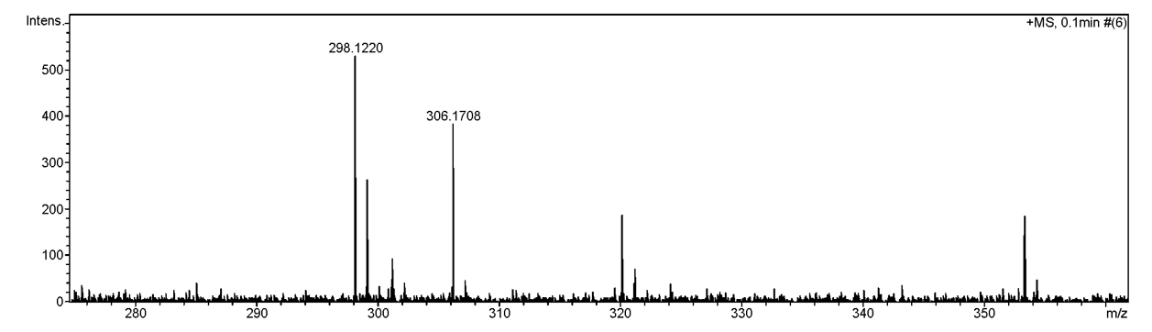


Compound **c18**

1H NMR


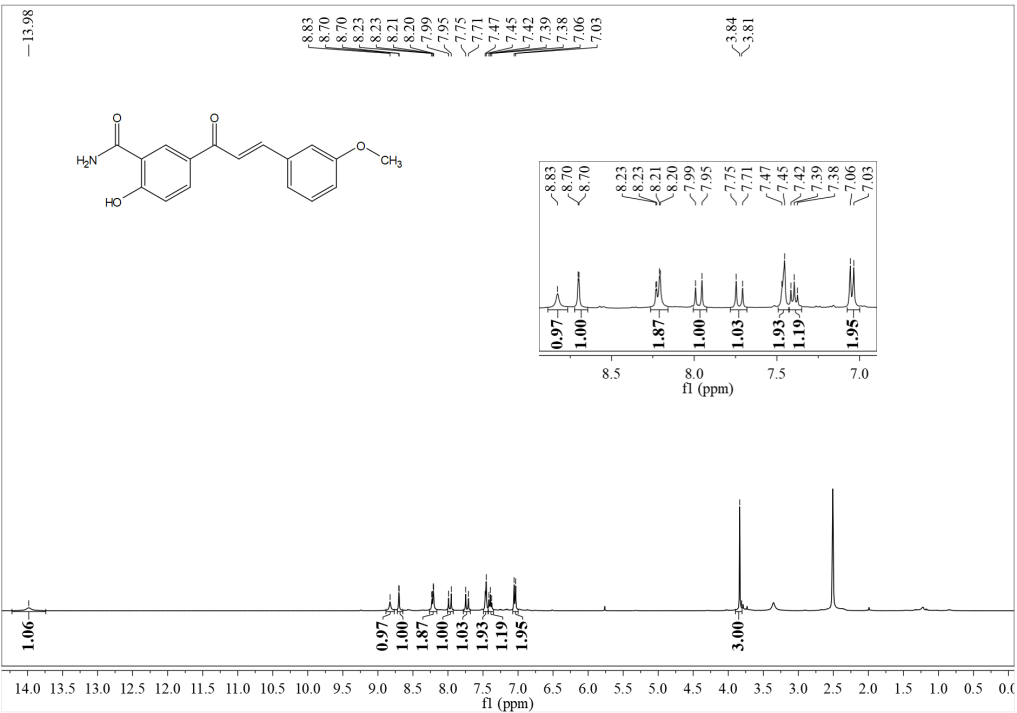


13C NMR


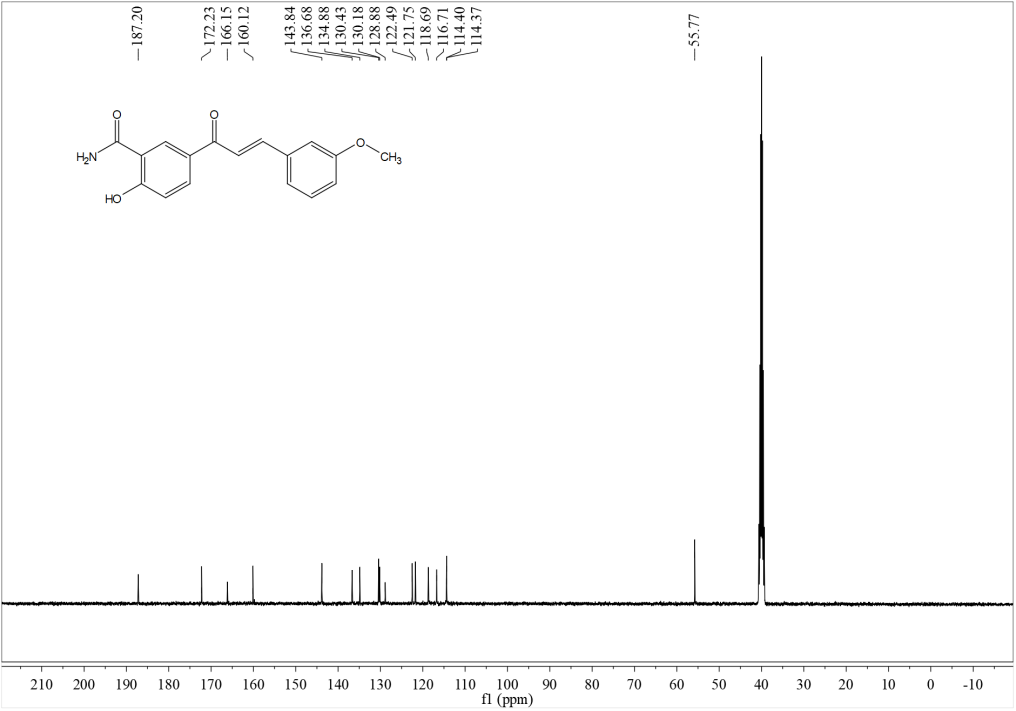


HRMS


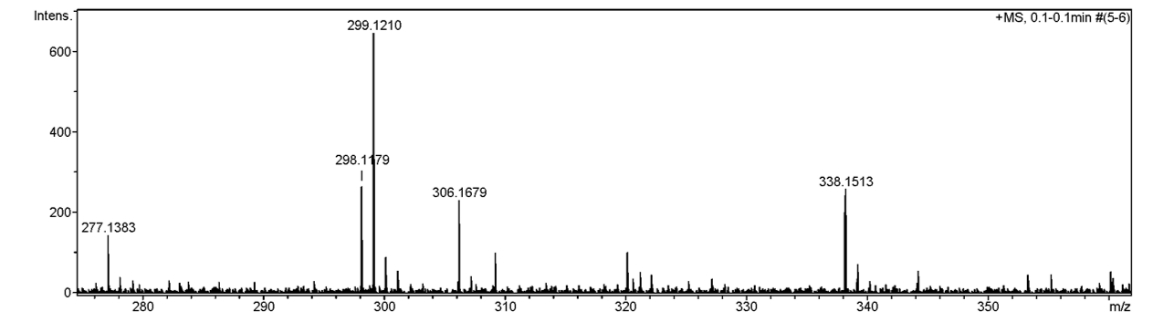


Compound **c19**

1H NMR


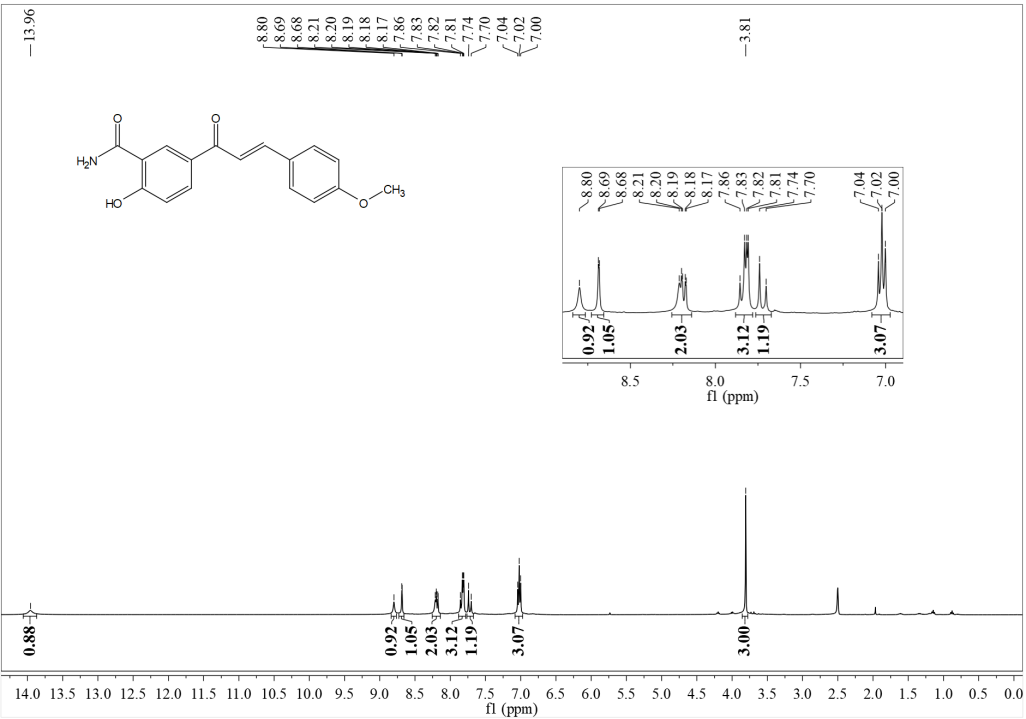


13C NMR


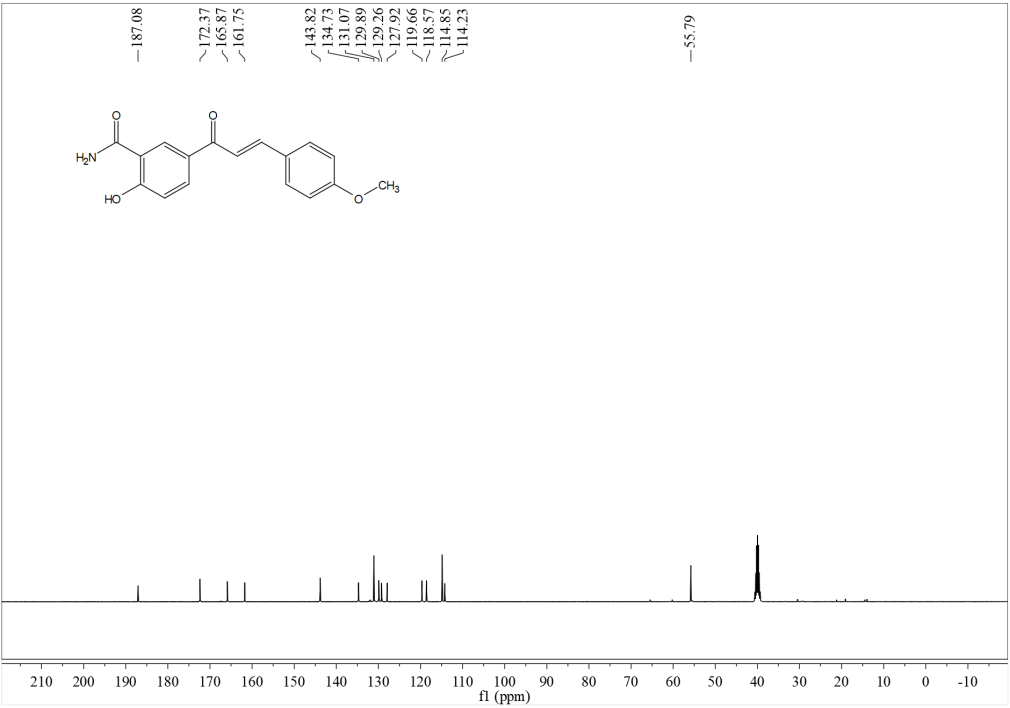


HRMS


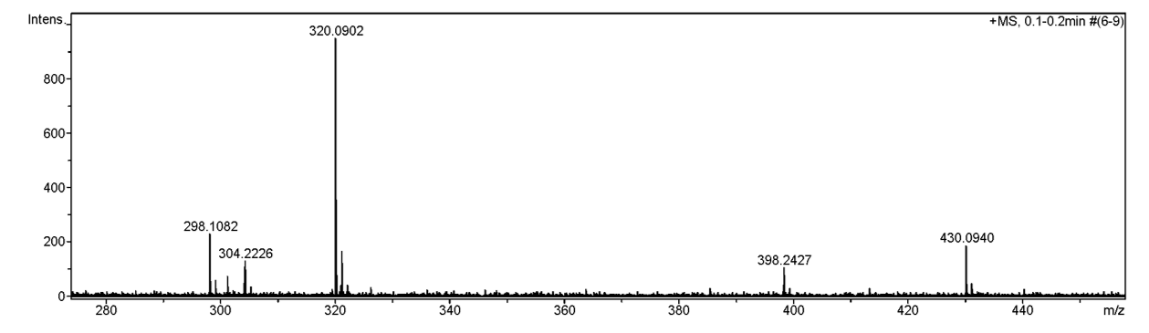


Compound **c20**

1H NMR


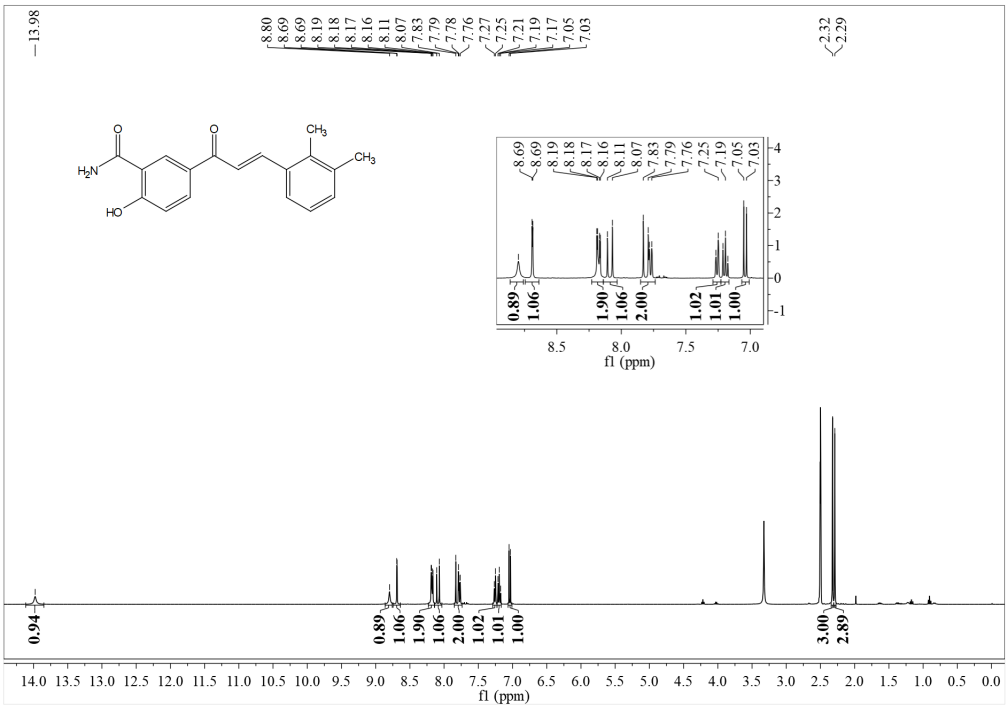


13C NMR


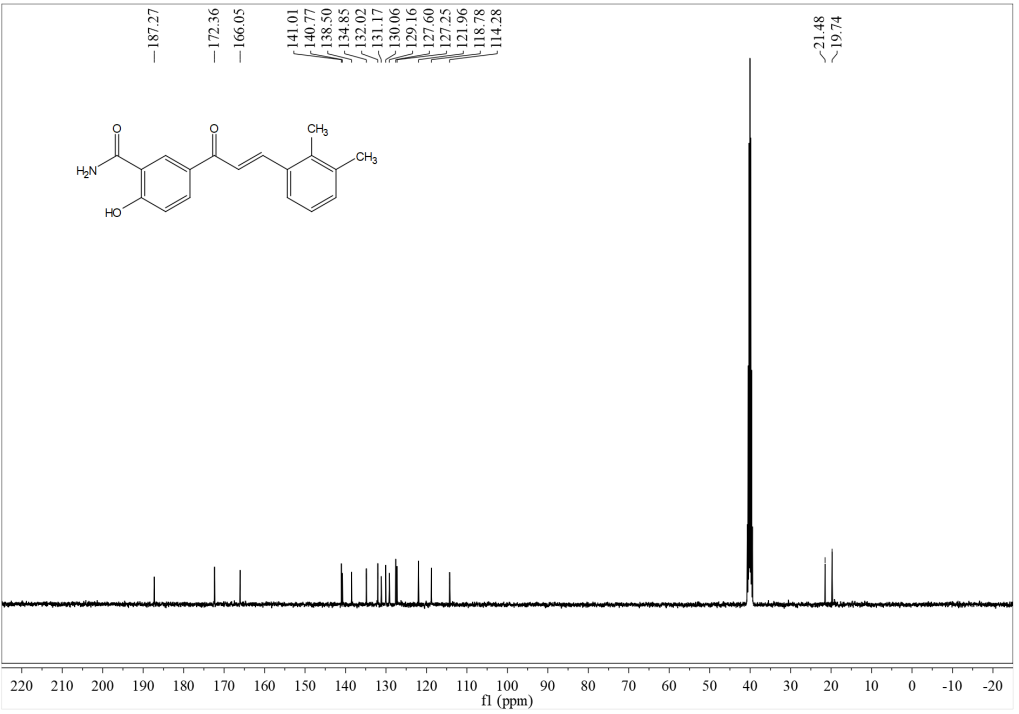


HRMS


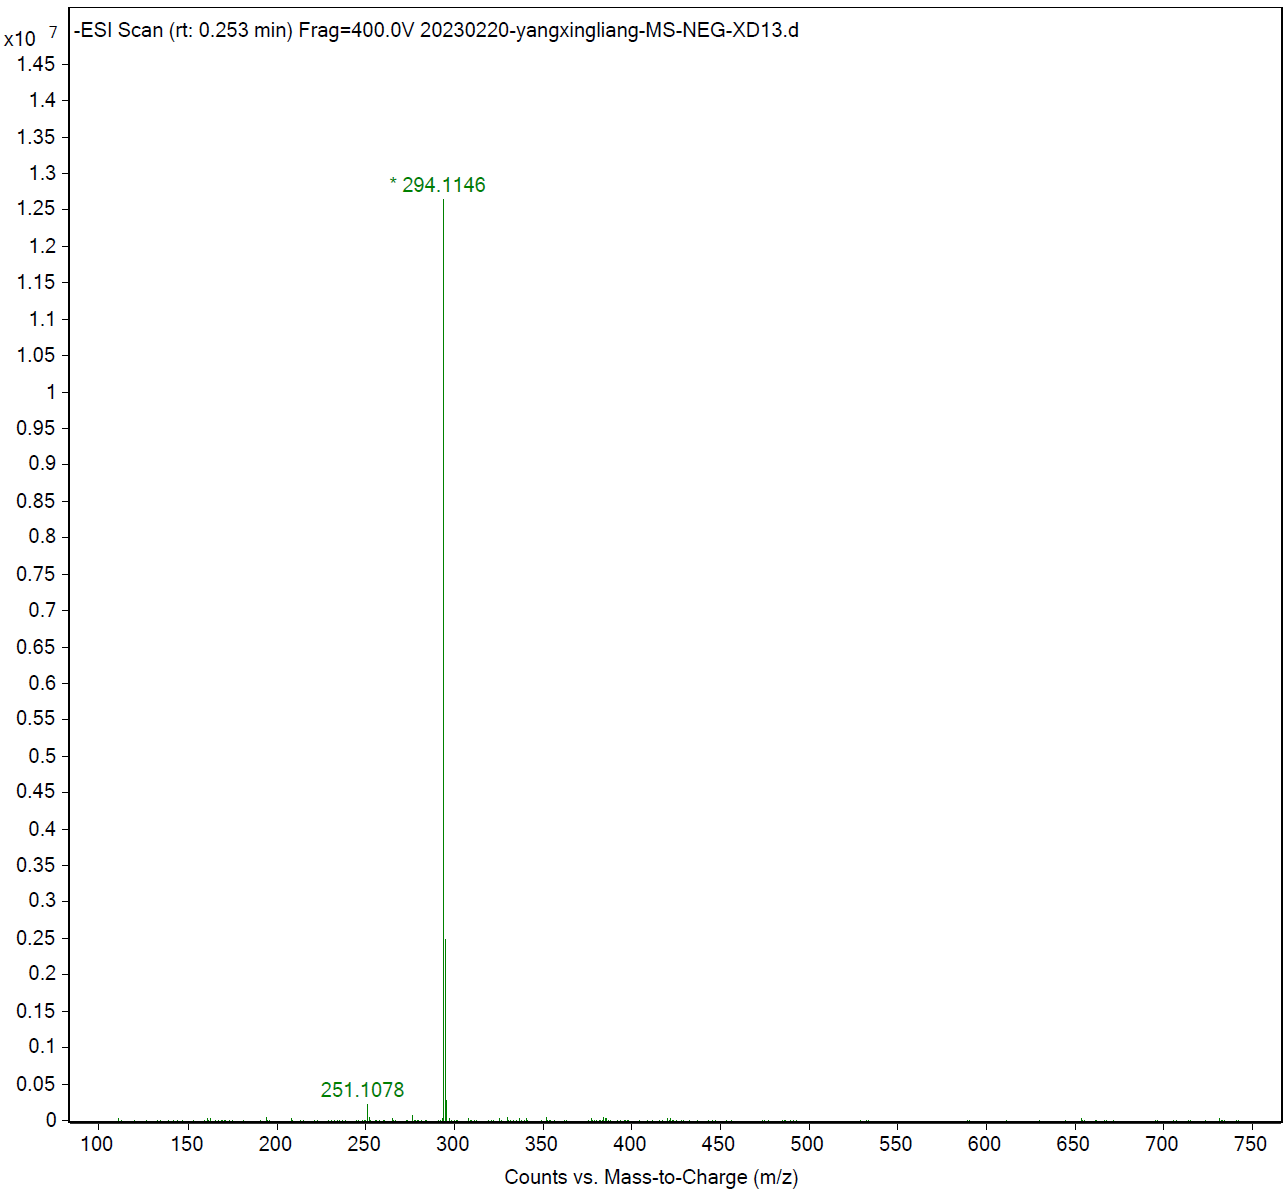


Compound **c21**

1H NMR


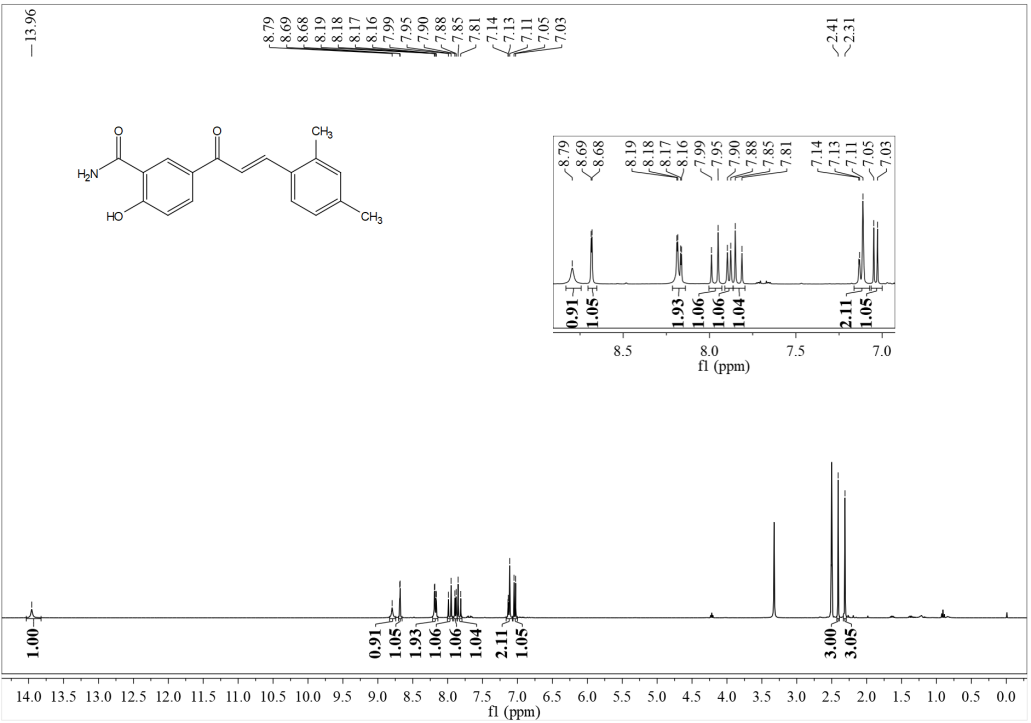


13C NMR


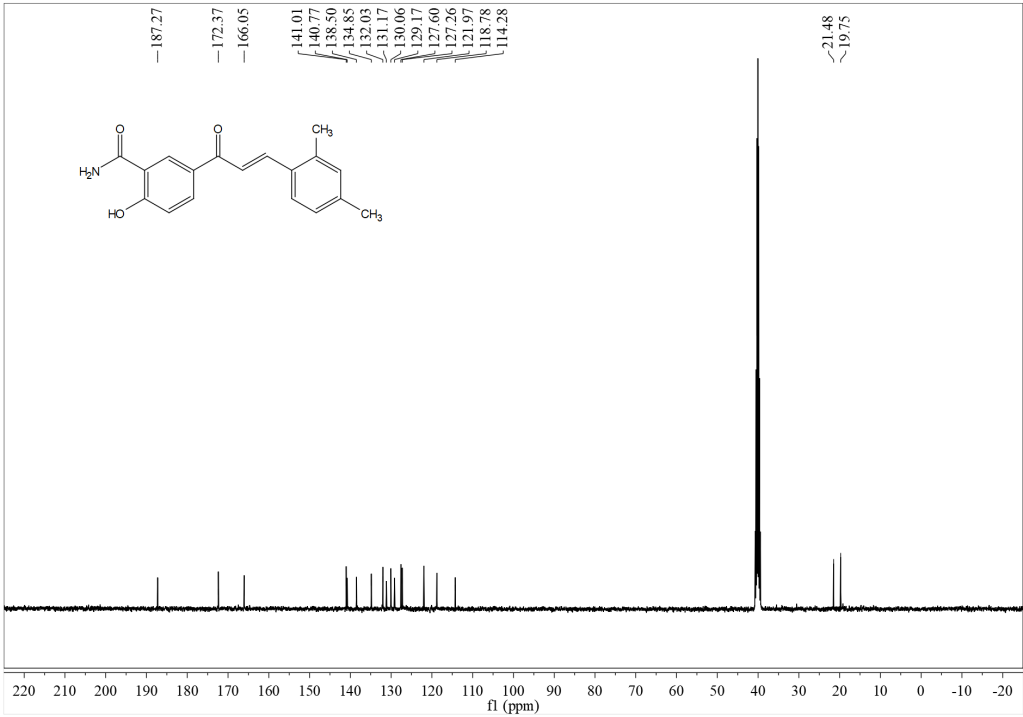


HRMS


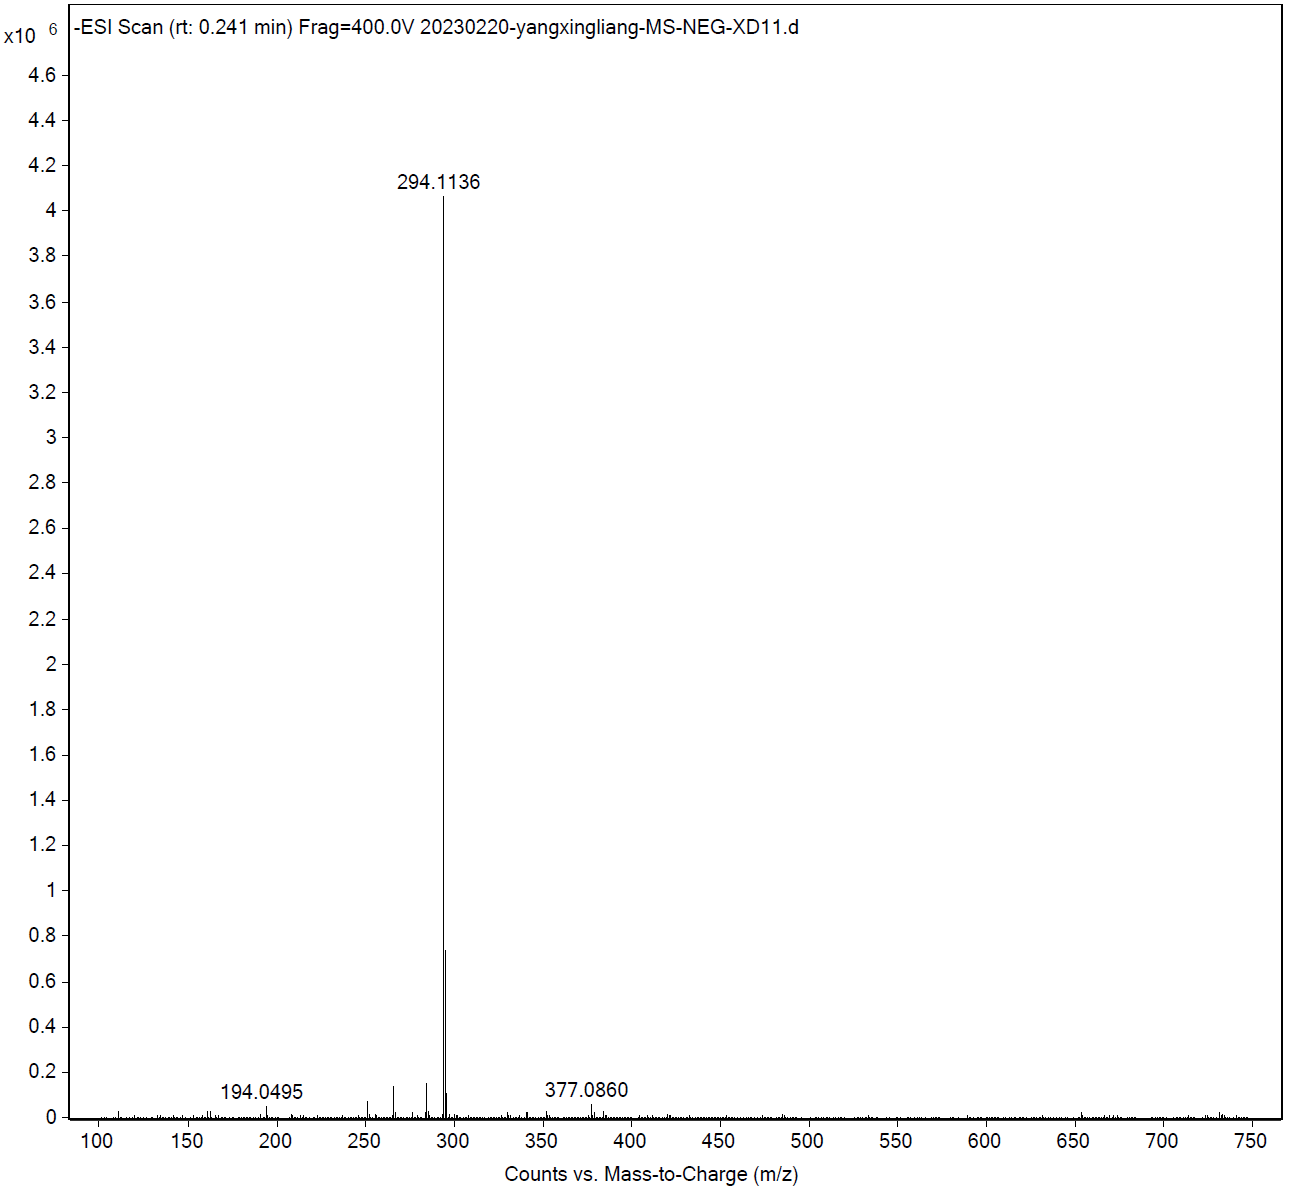


Compound **c22**

1H NMR


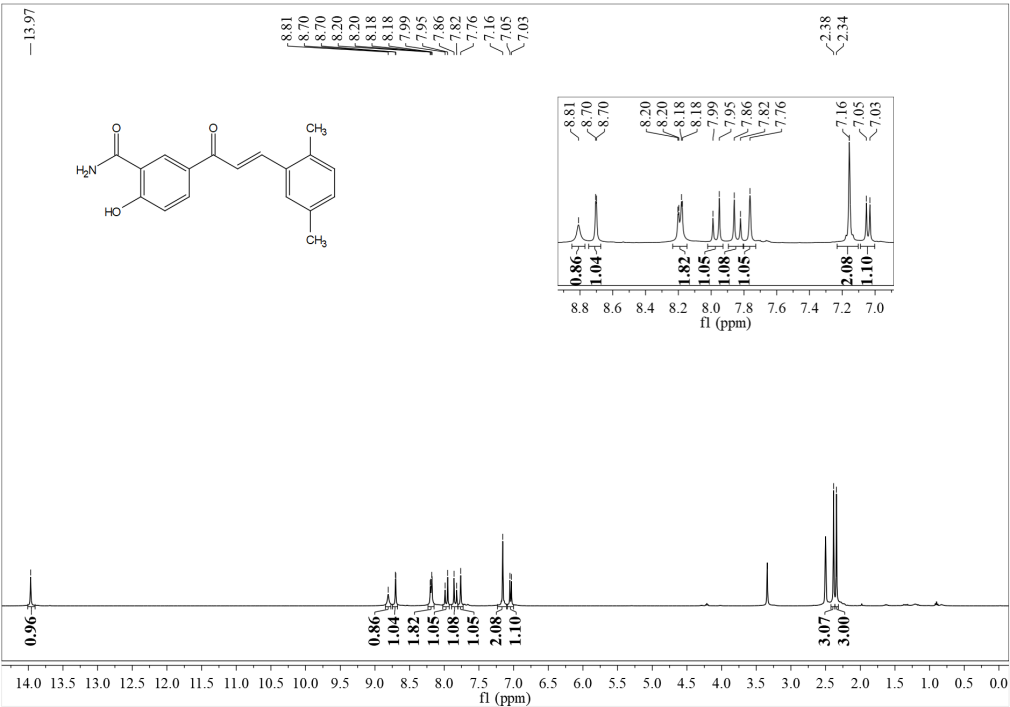


13C NMR


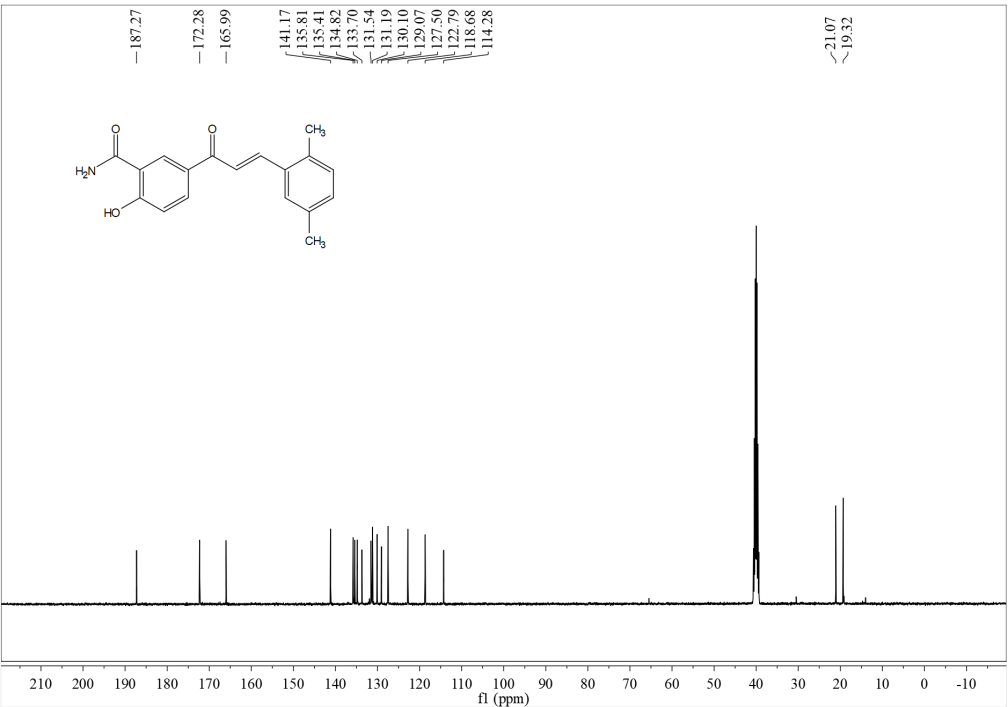


HRMS


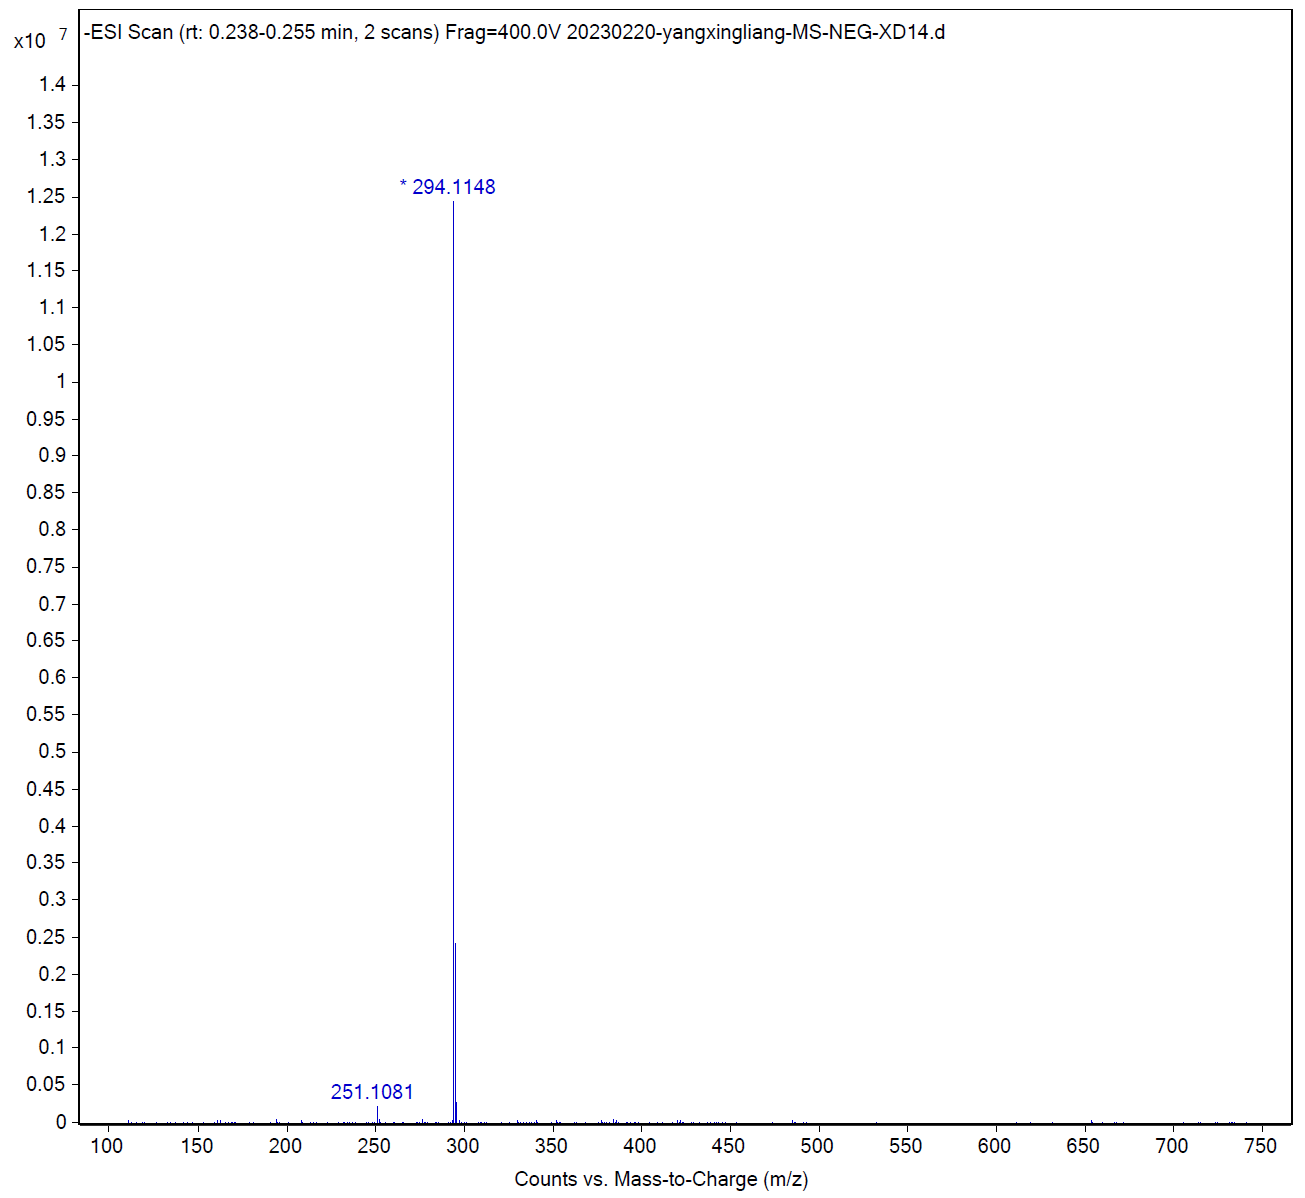


Compound **c23**

1H NMR


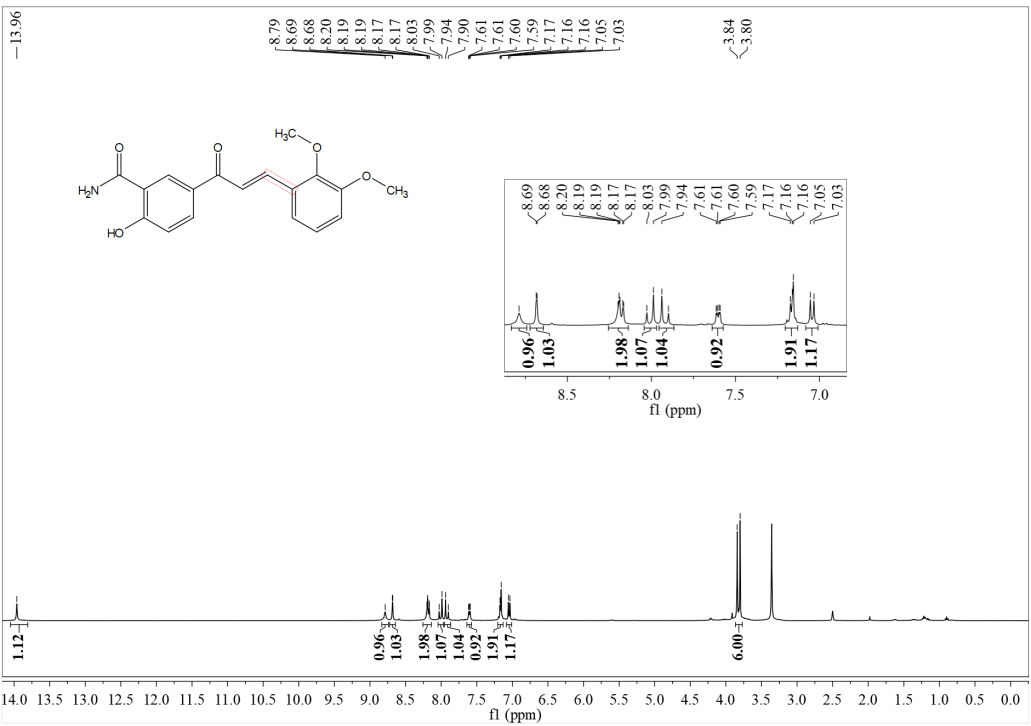


13C NMR


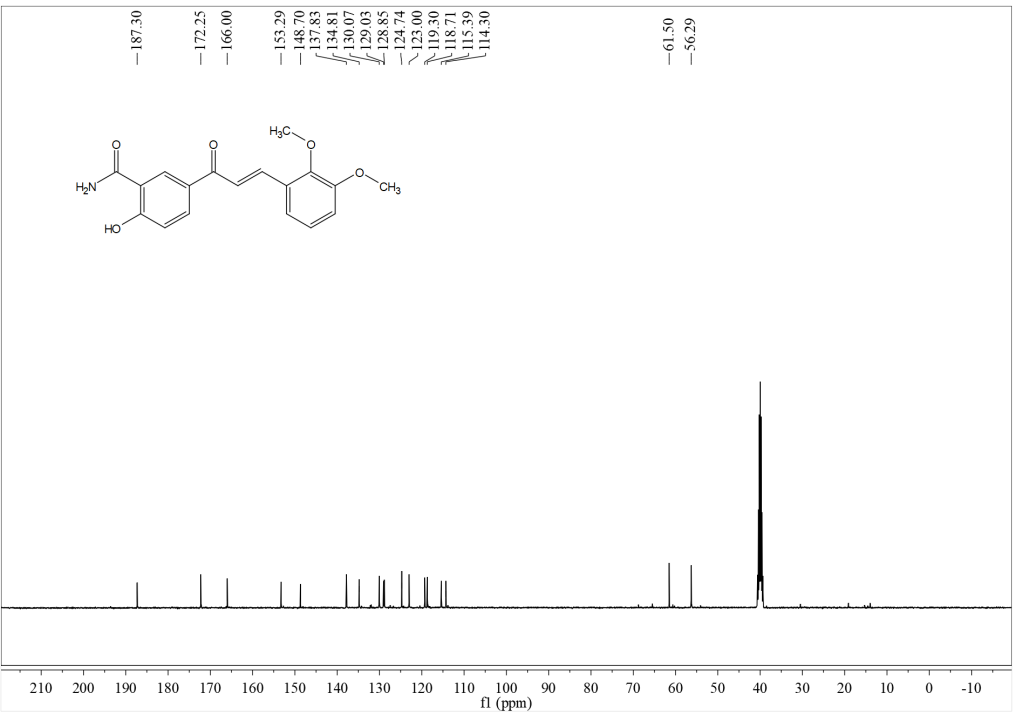


HRMS


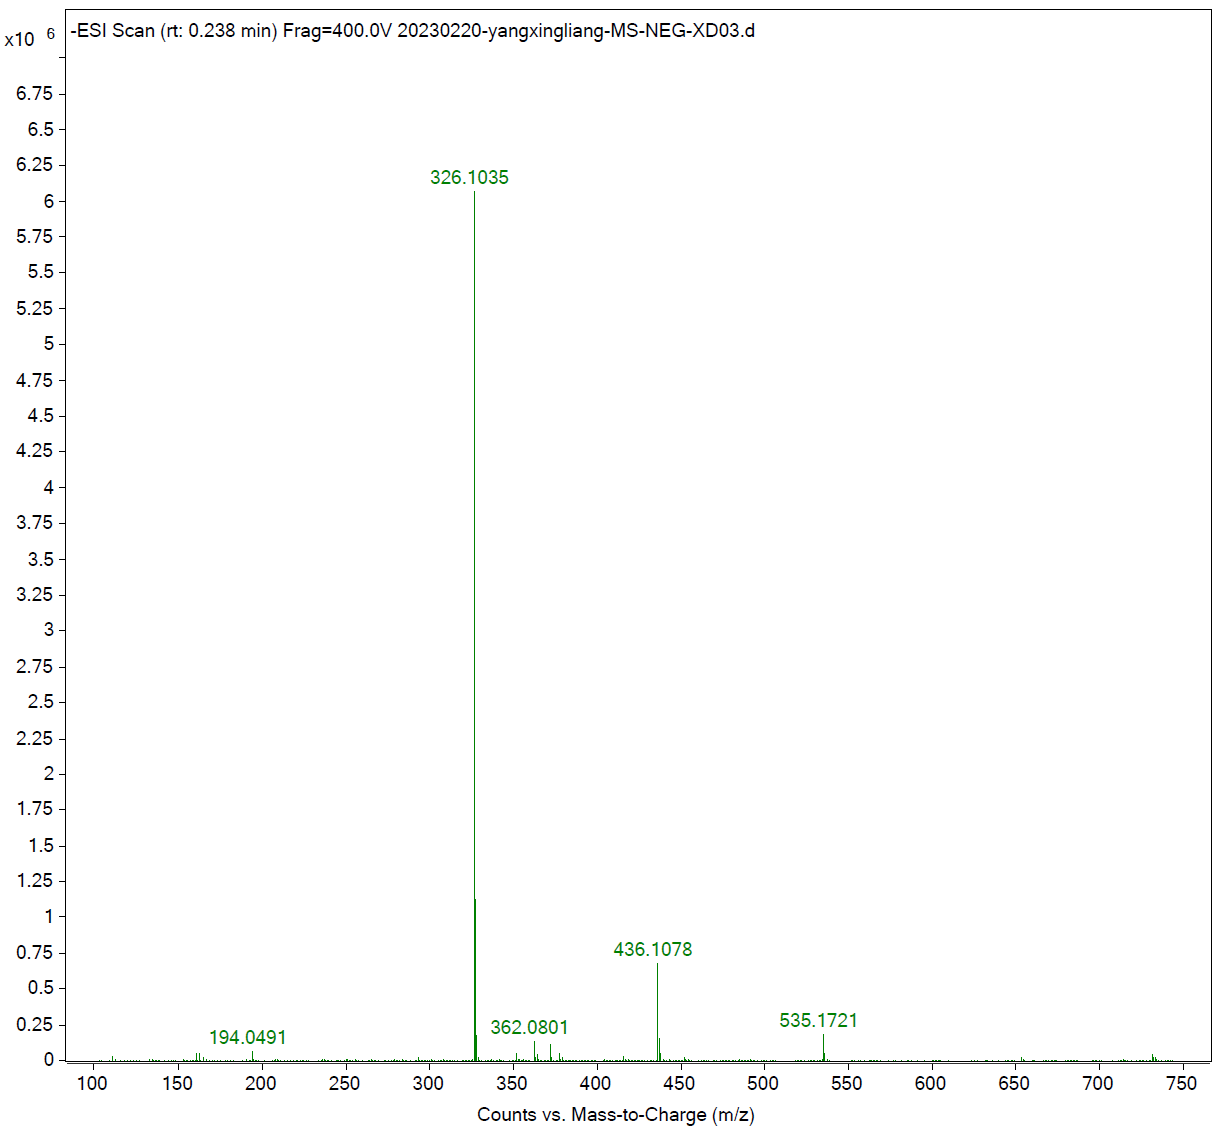


Compound **c24**

1H NMR


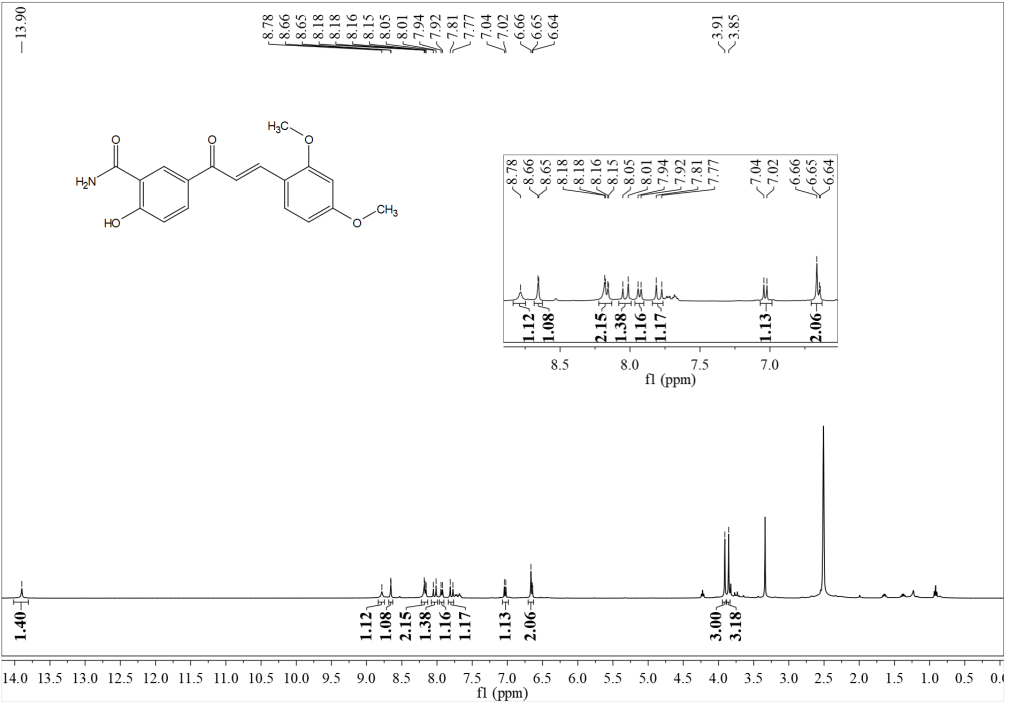


13C NMR


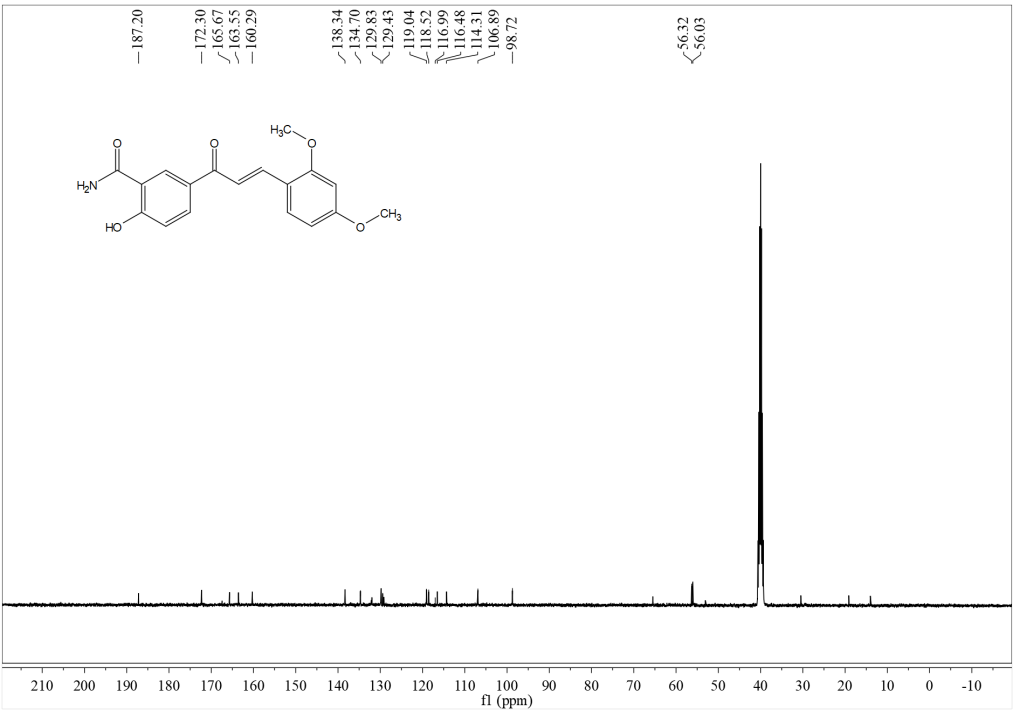


HRMS


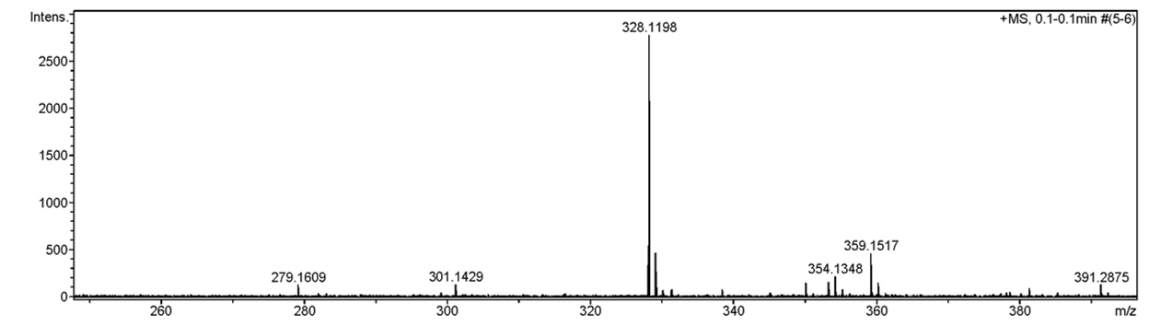


Compound **c25**

1H NMR


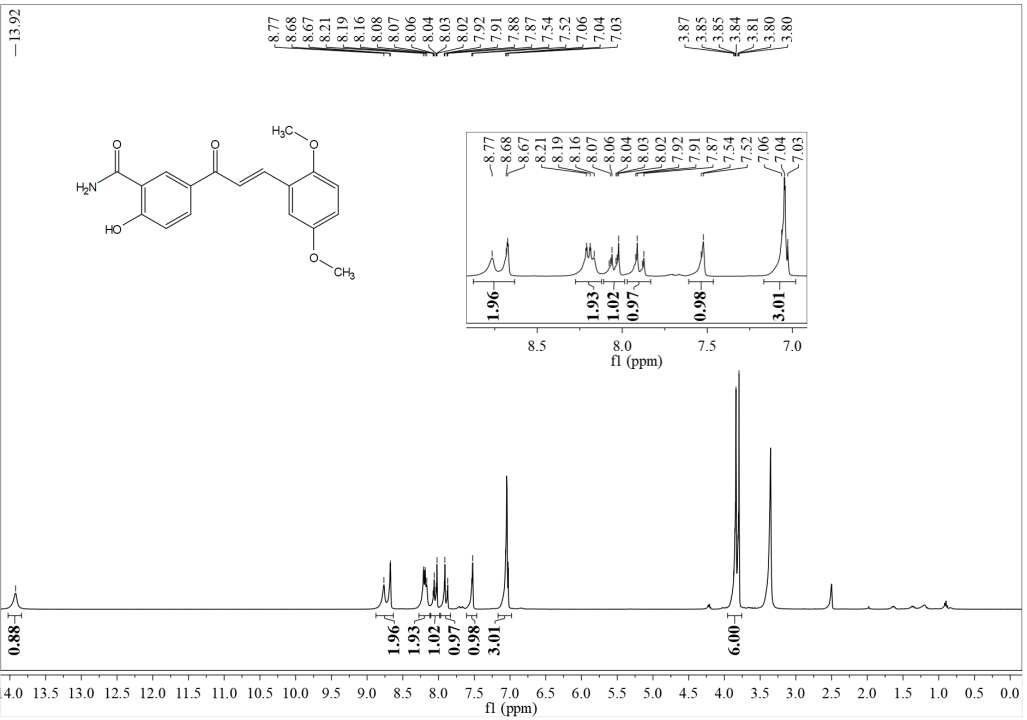


13C NMR


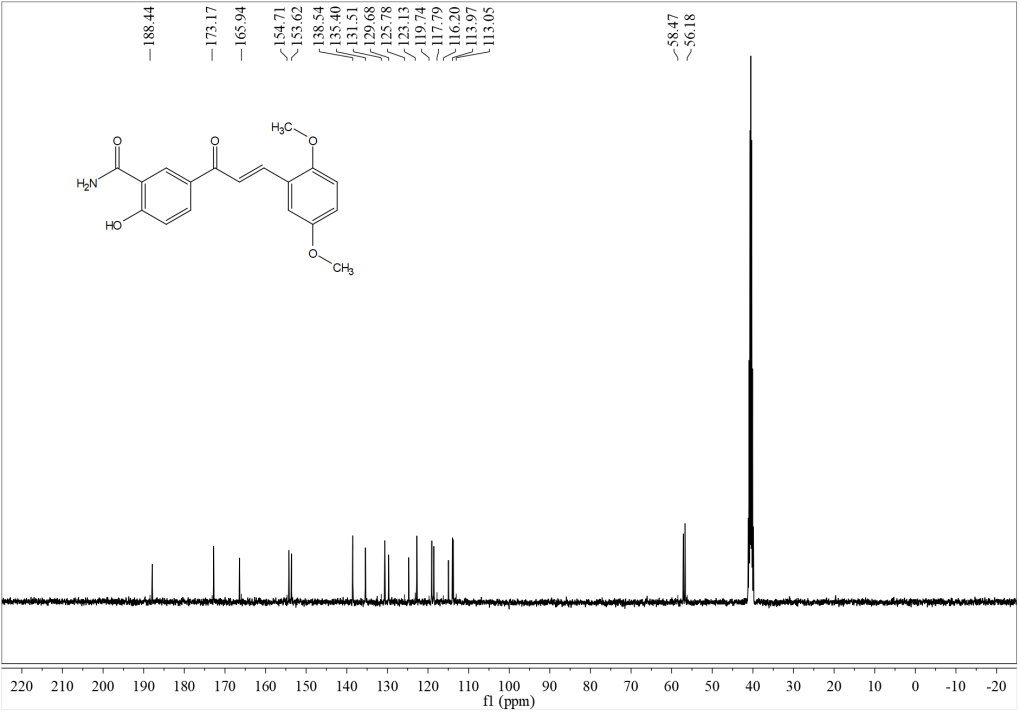


HRMS


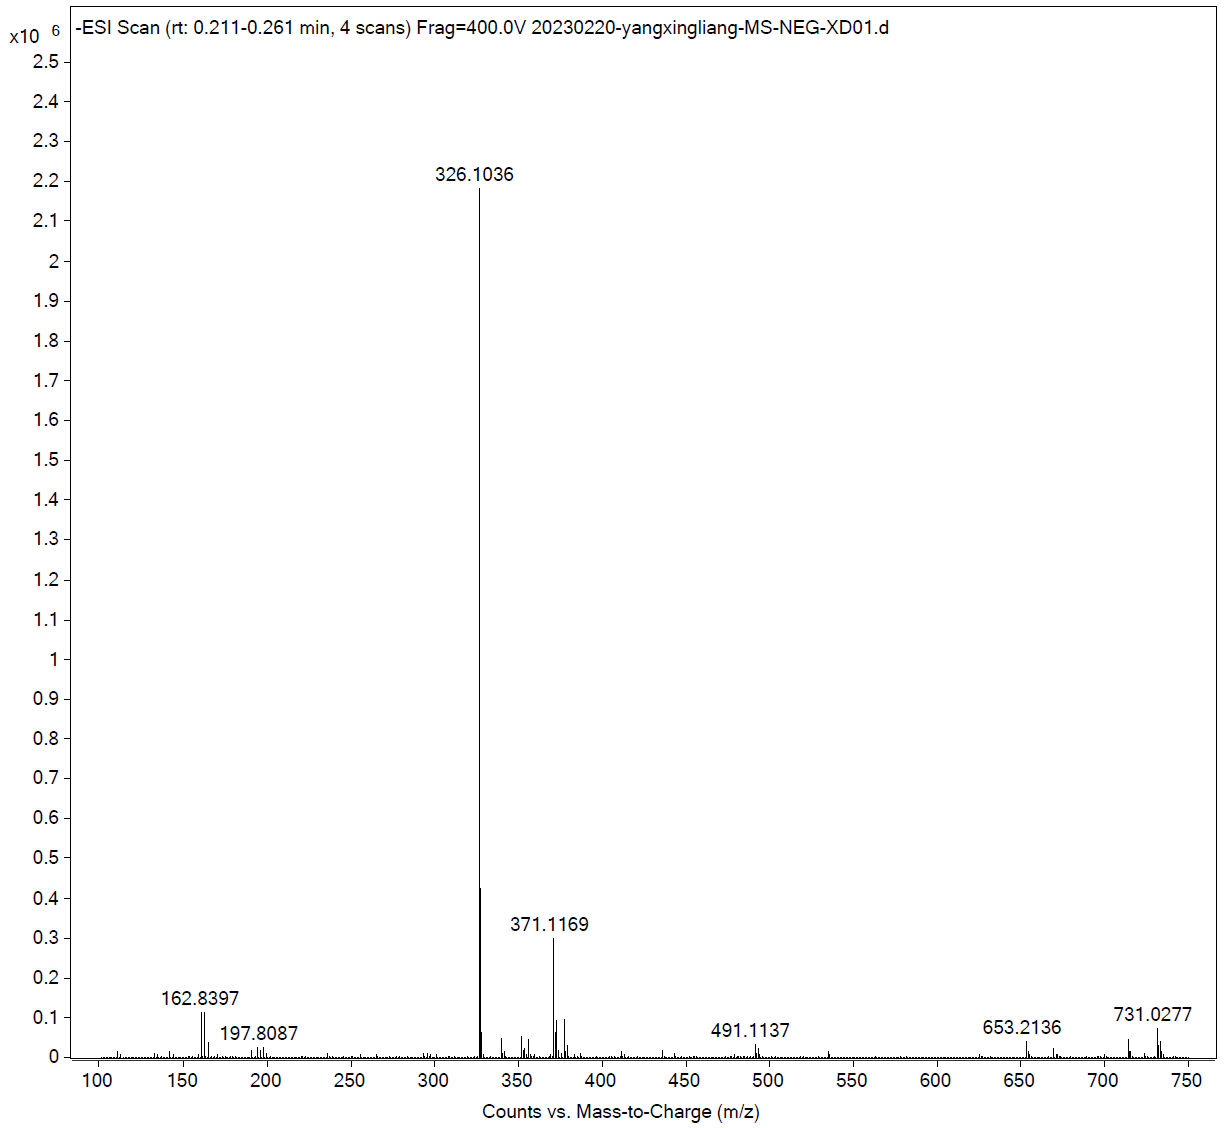


Compound **c26**

1H NMR


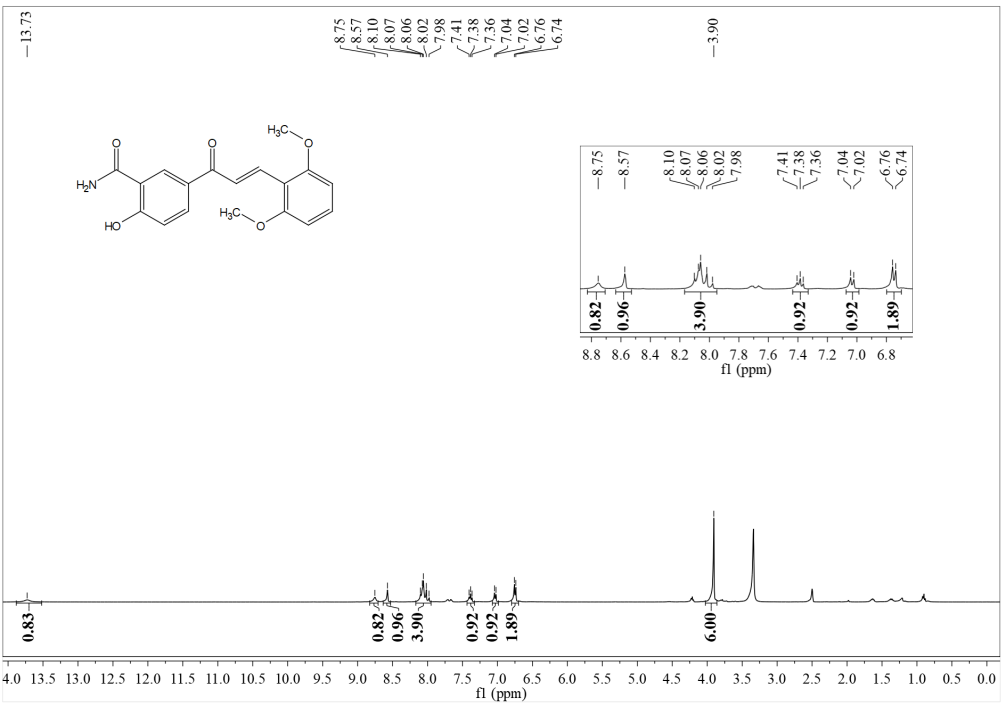


13C NMR


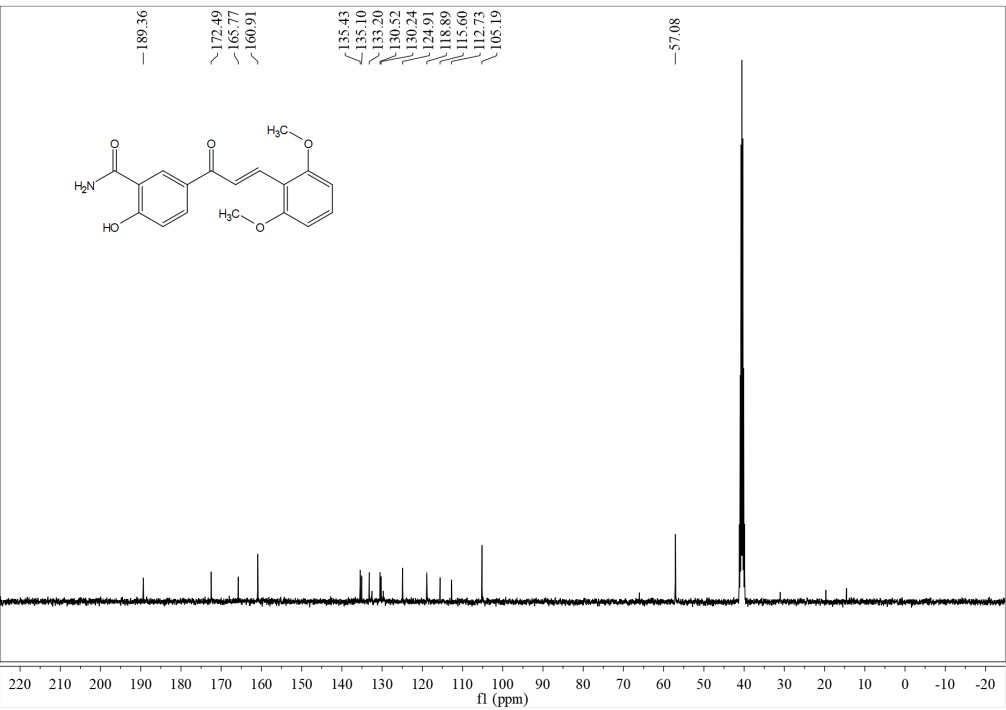


HRMS


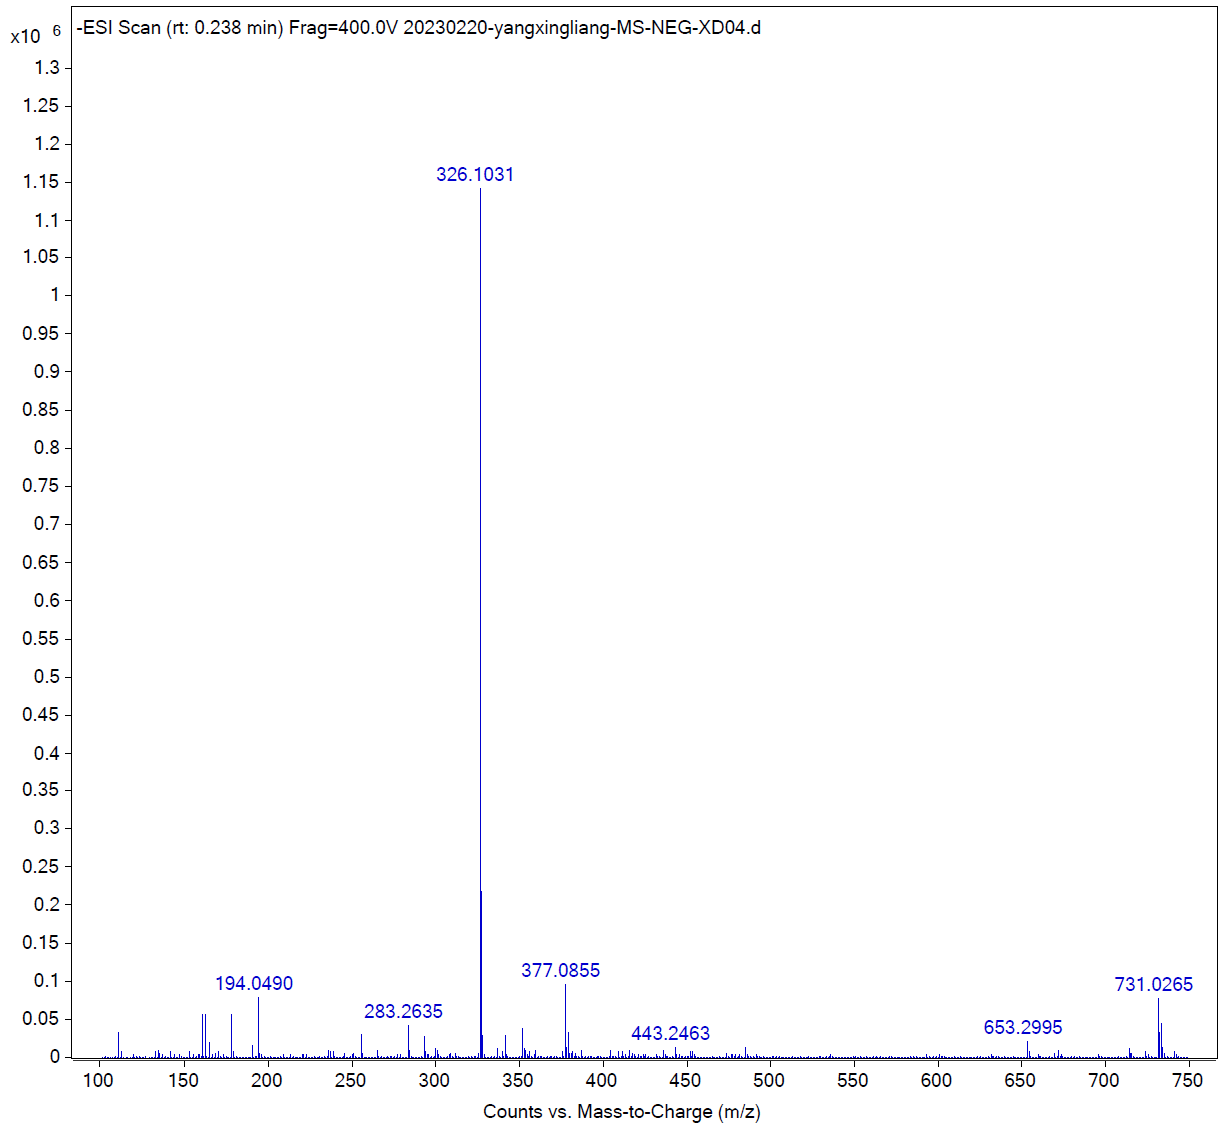


Compound **c27**

1H NMR


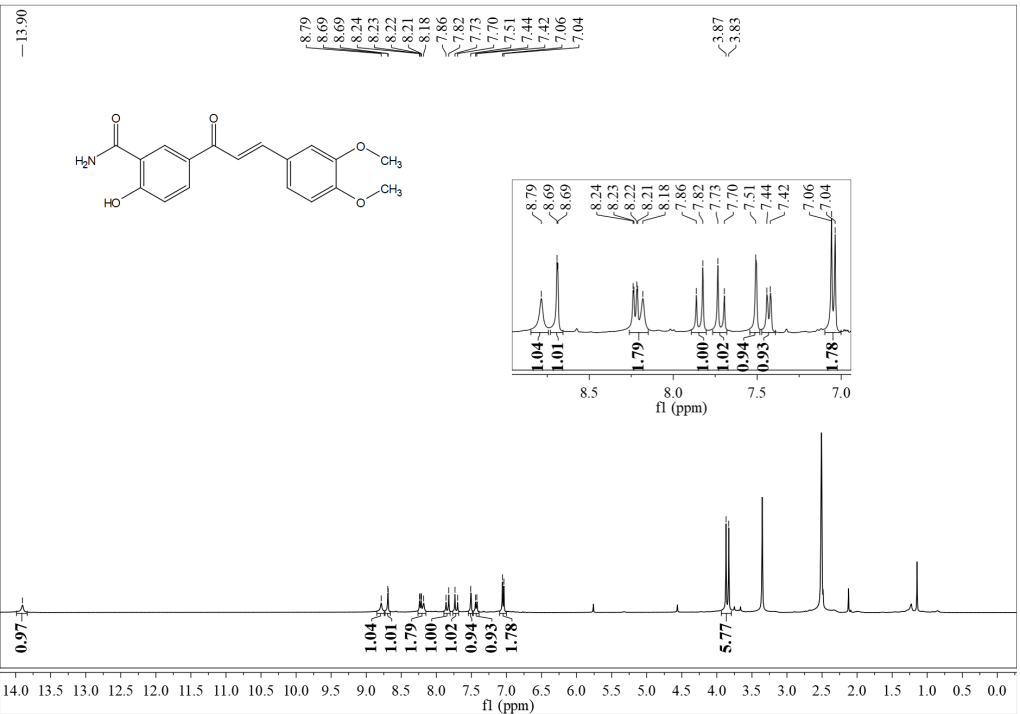


13C NMR


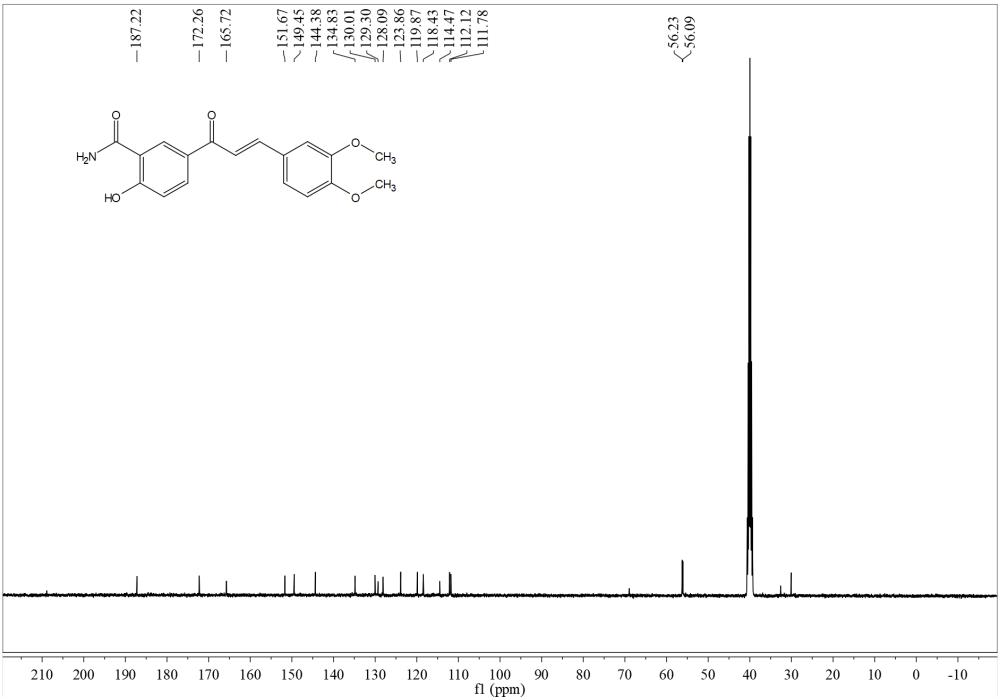


HRMS


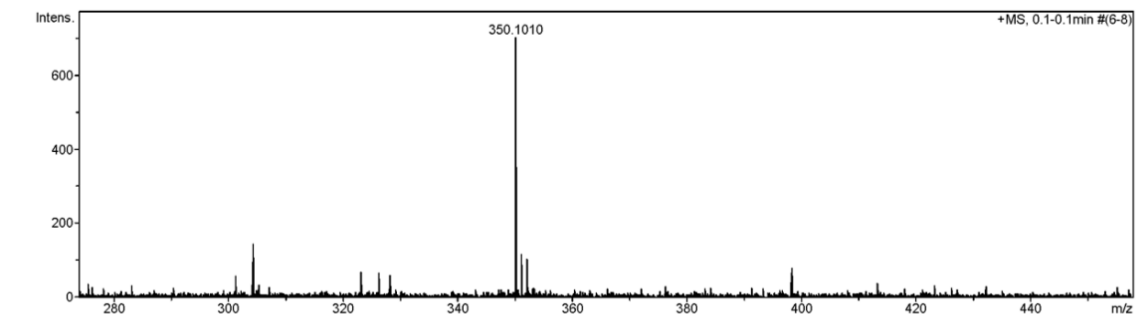


Compound **c28**

1H NMR


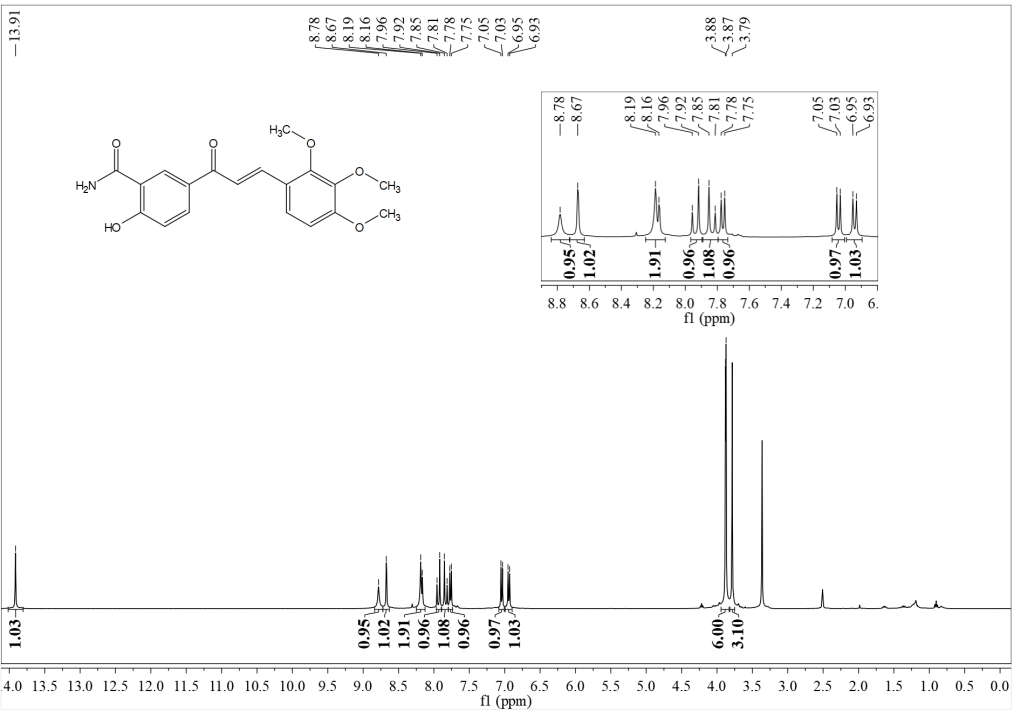


13C NMR


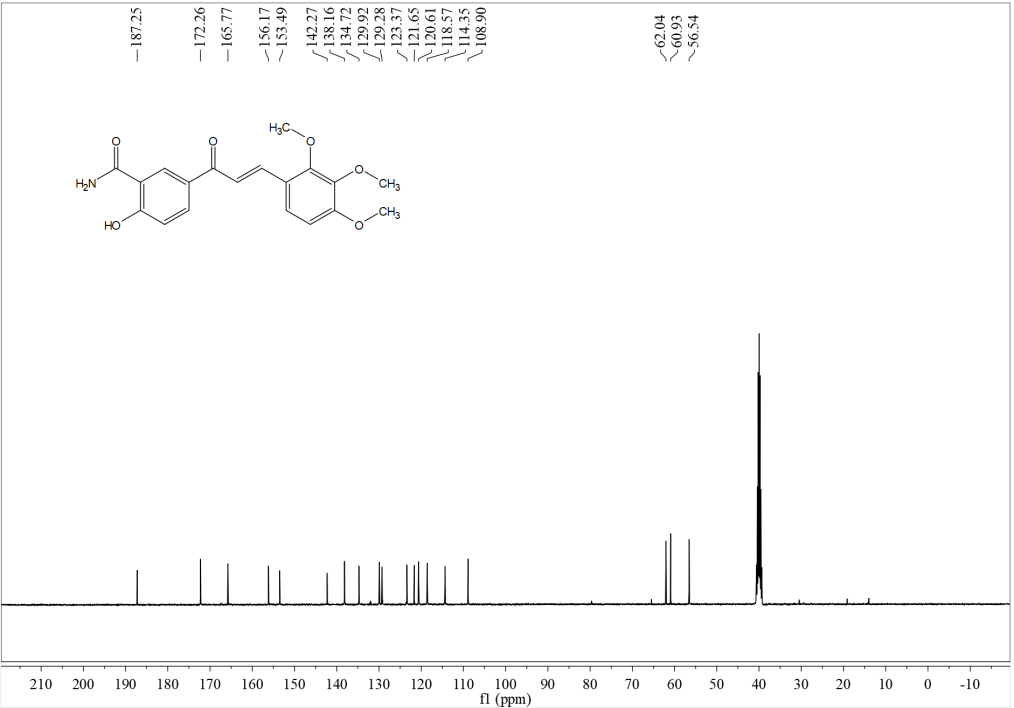


HRMS


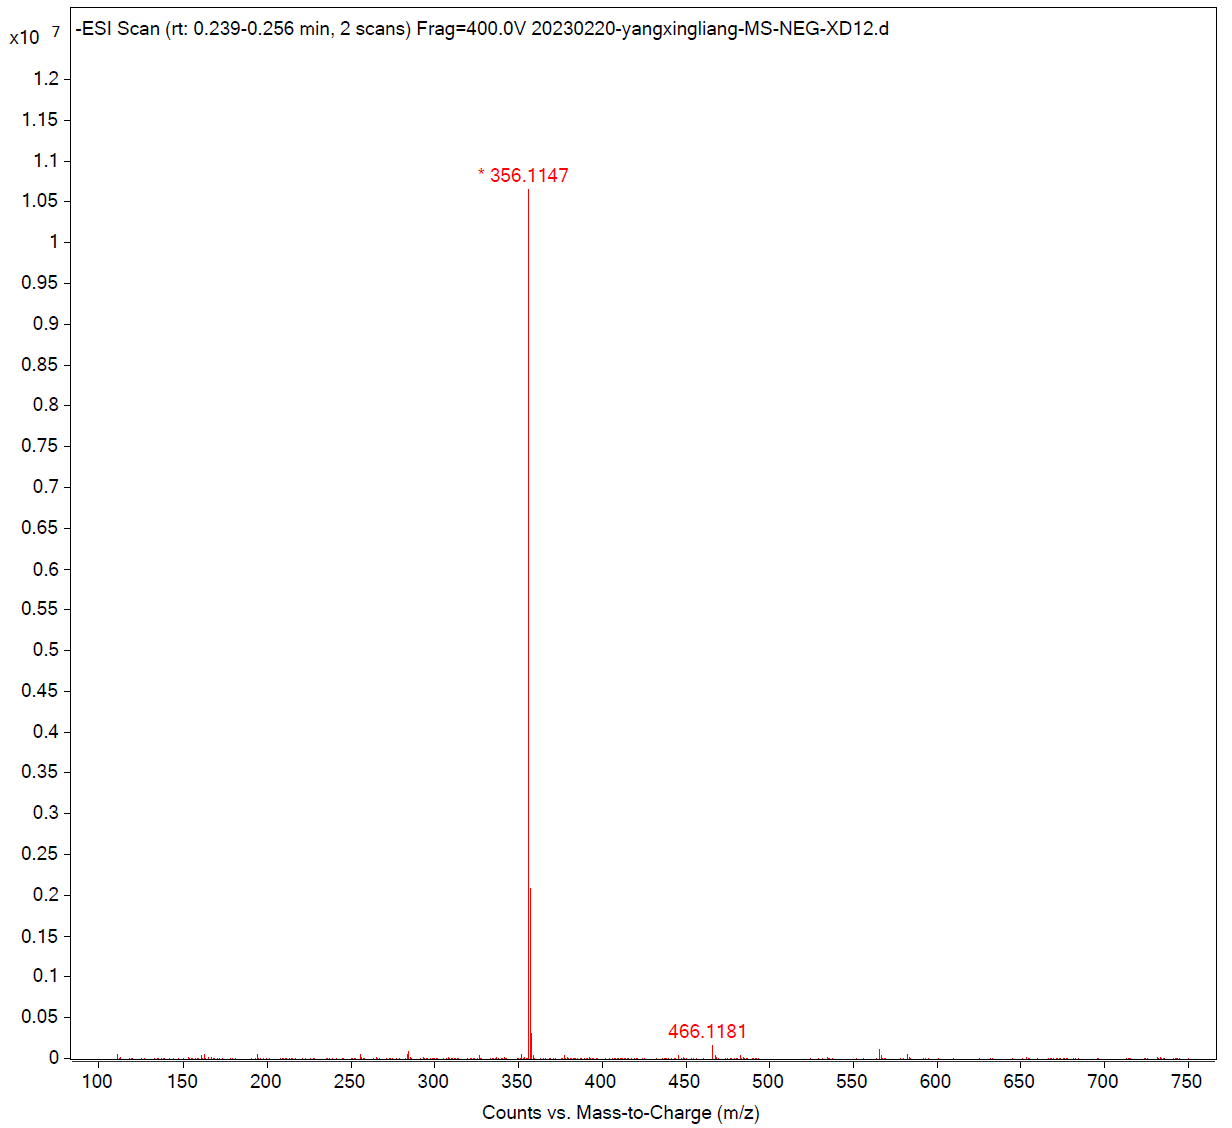


Compound **c29**

1H NMR


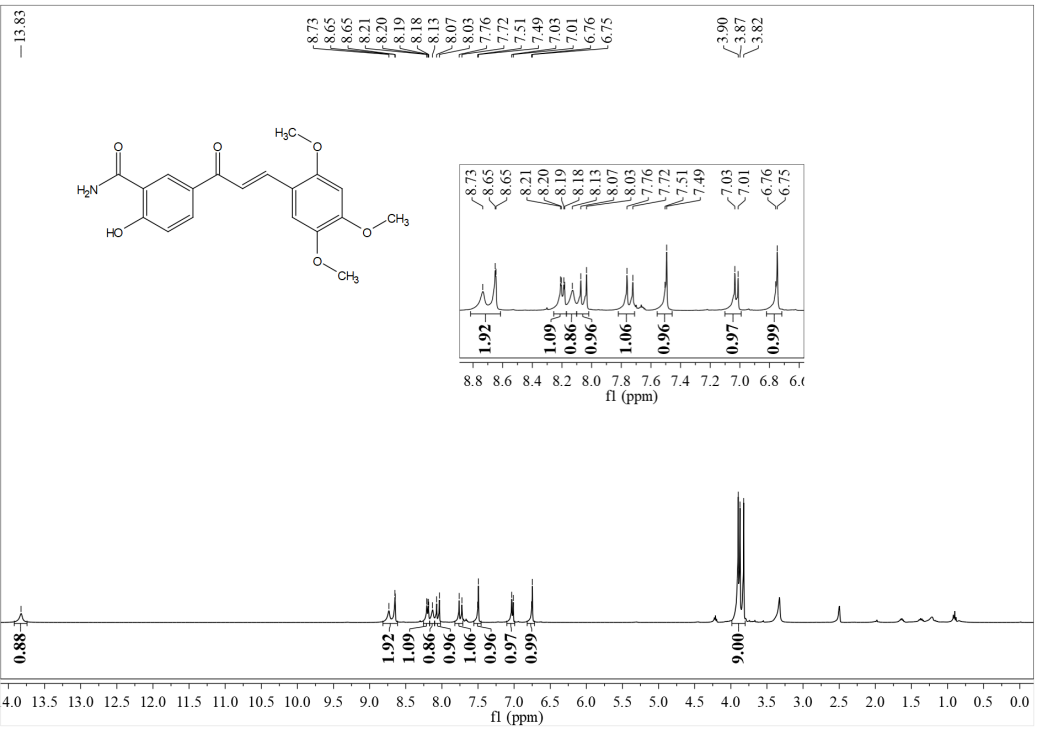


13C NMR


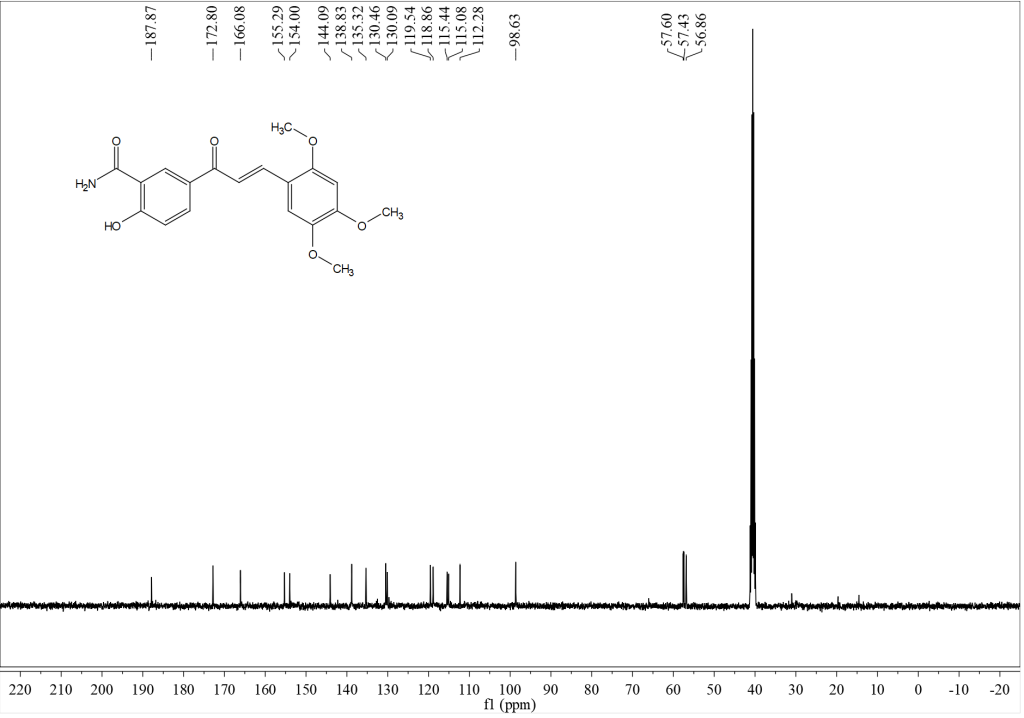


HRMS


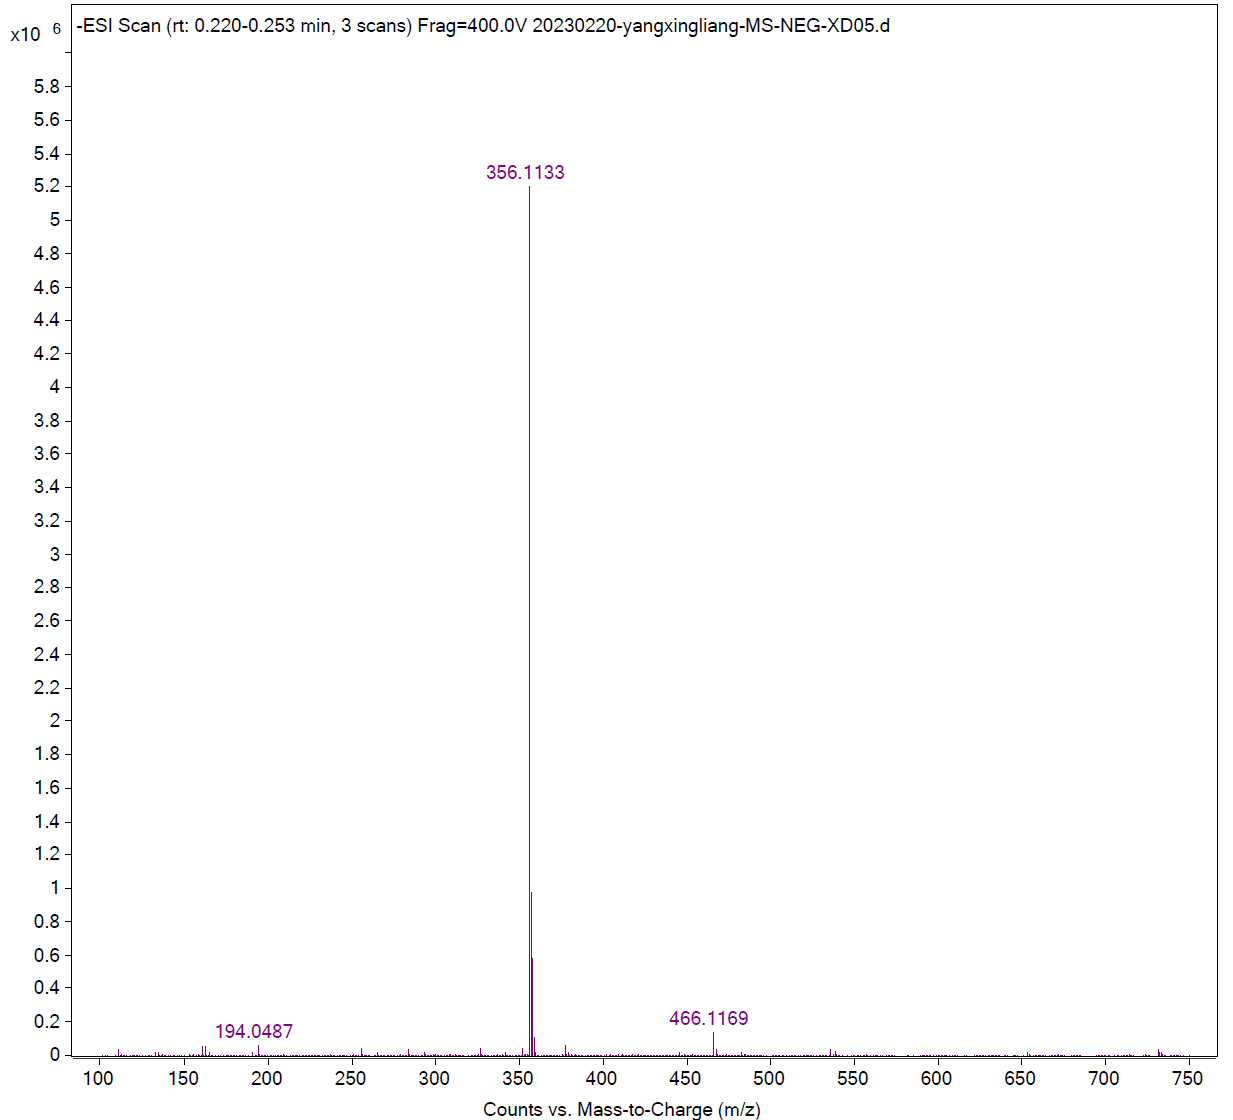


Compound **c30**

1H NMR


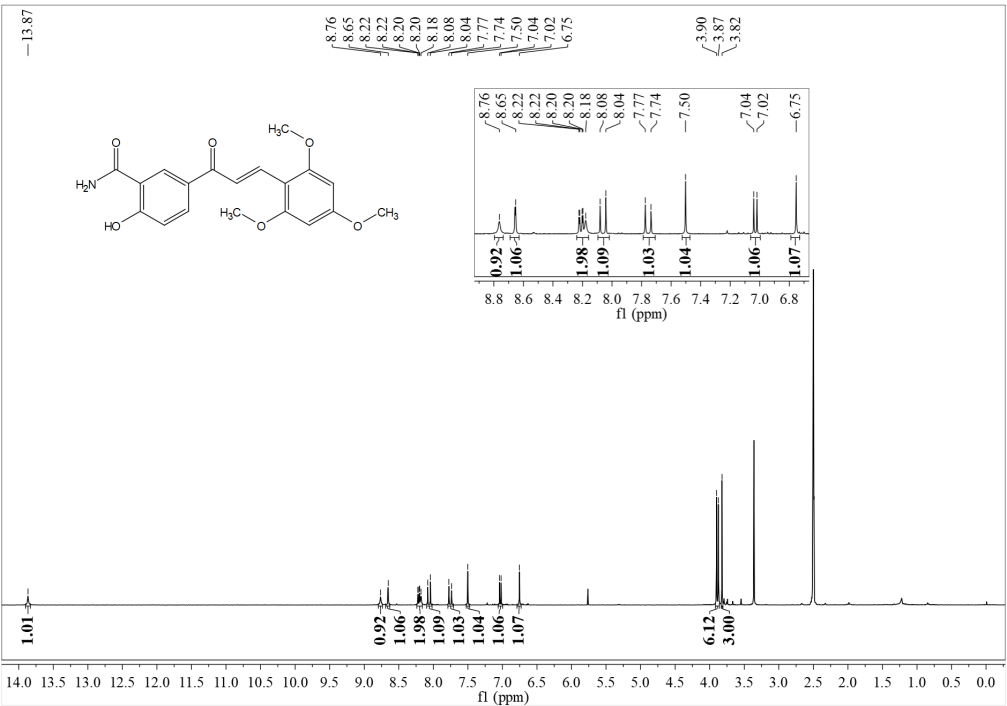


13C NMR


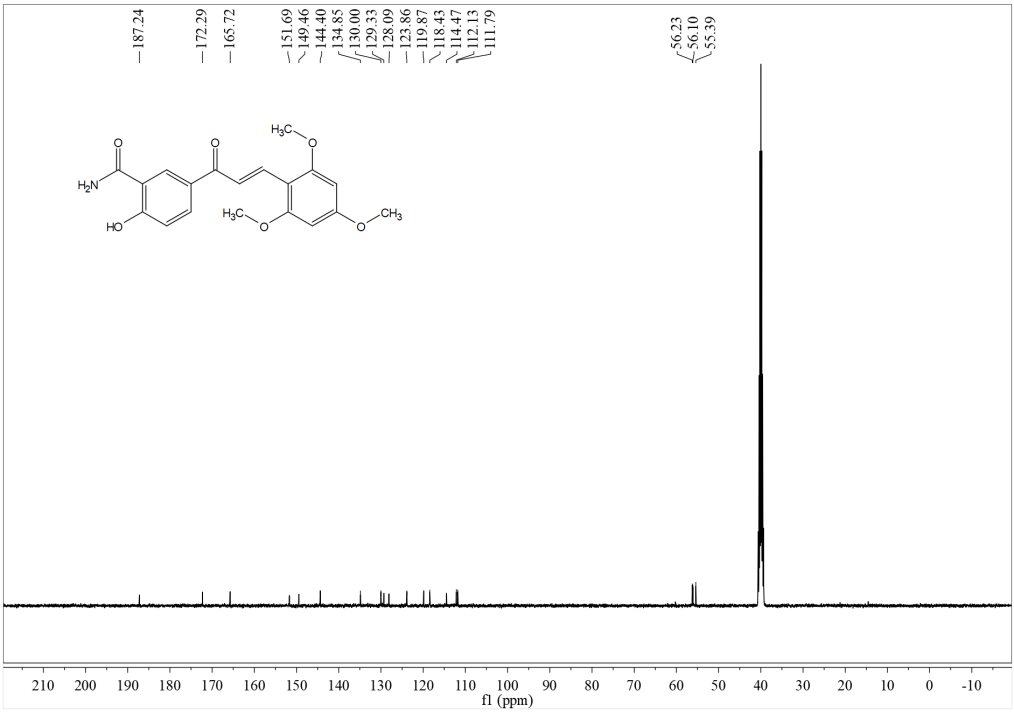


HRMS


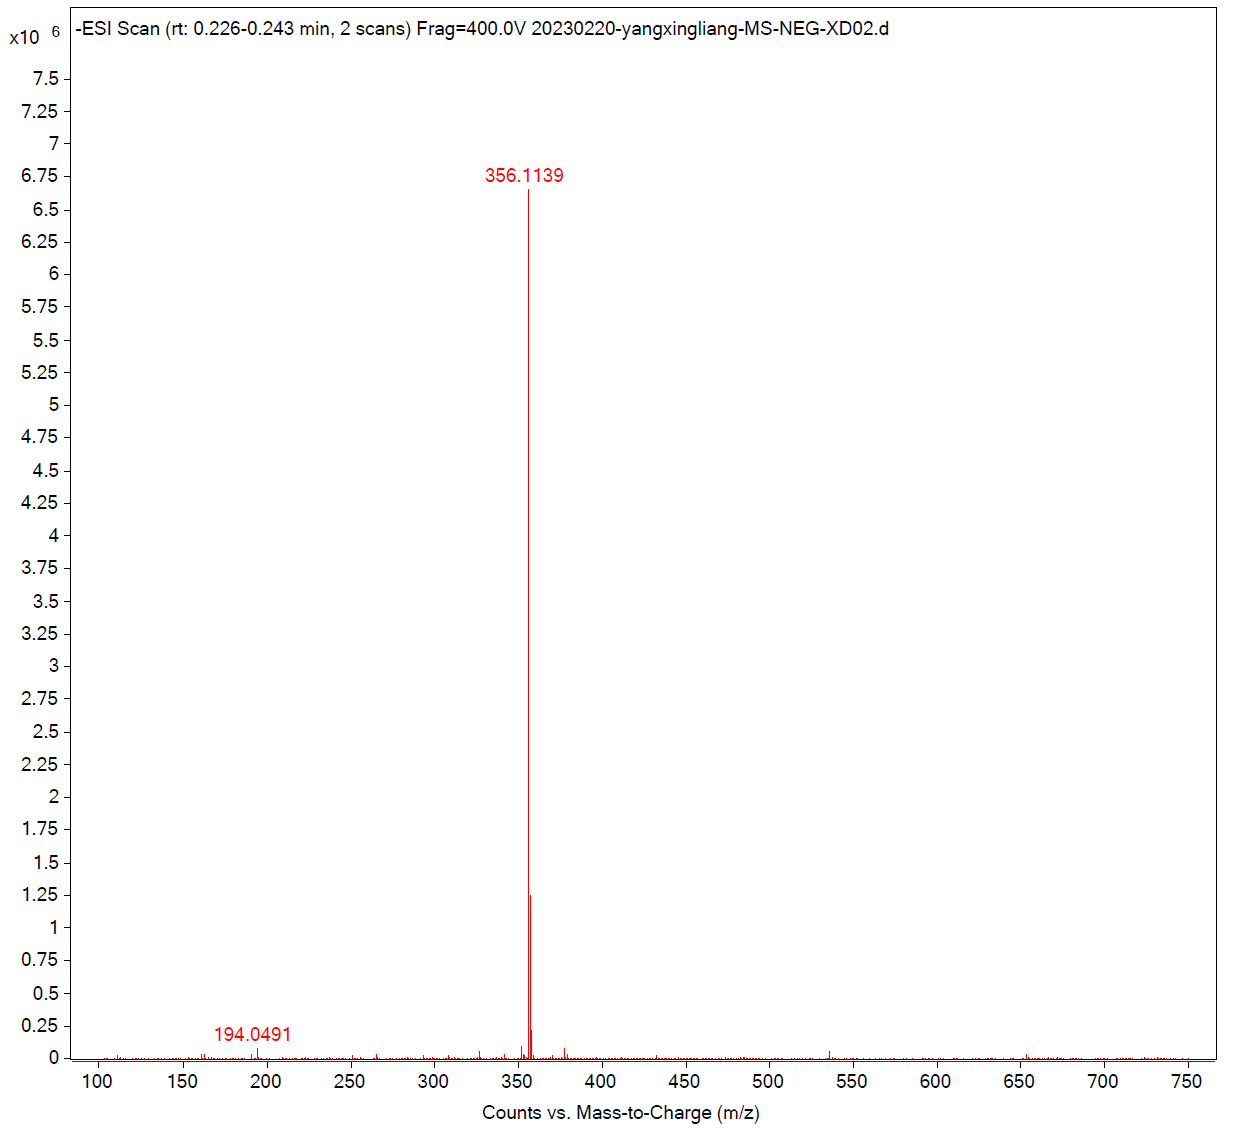


Compound **c31**

1H NMR


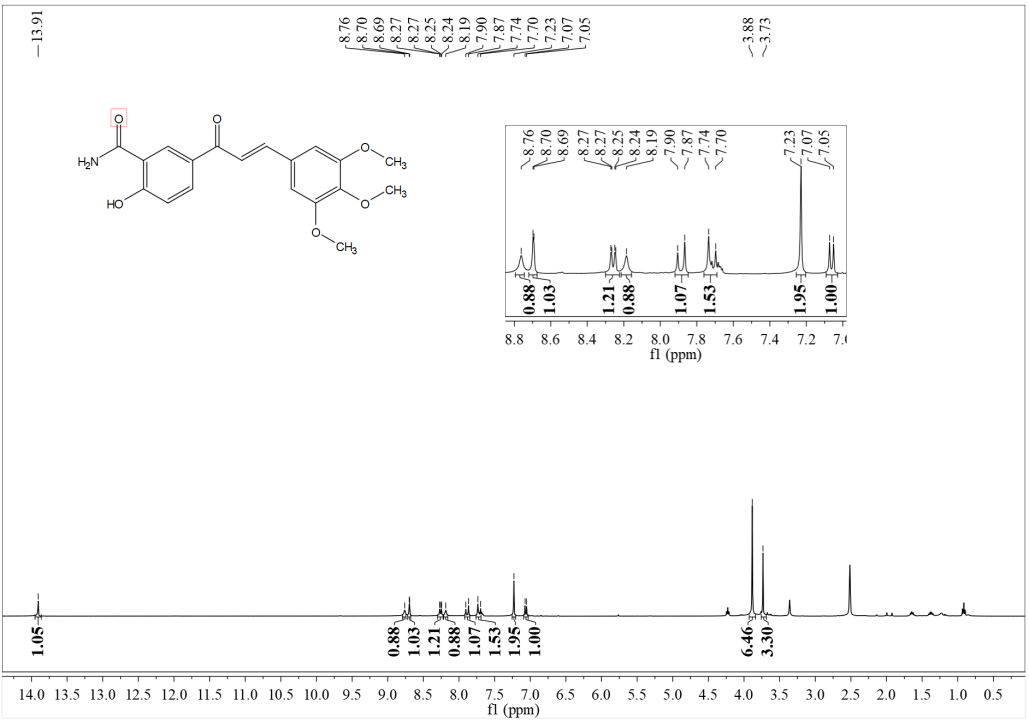


13C NMR


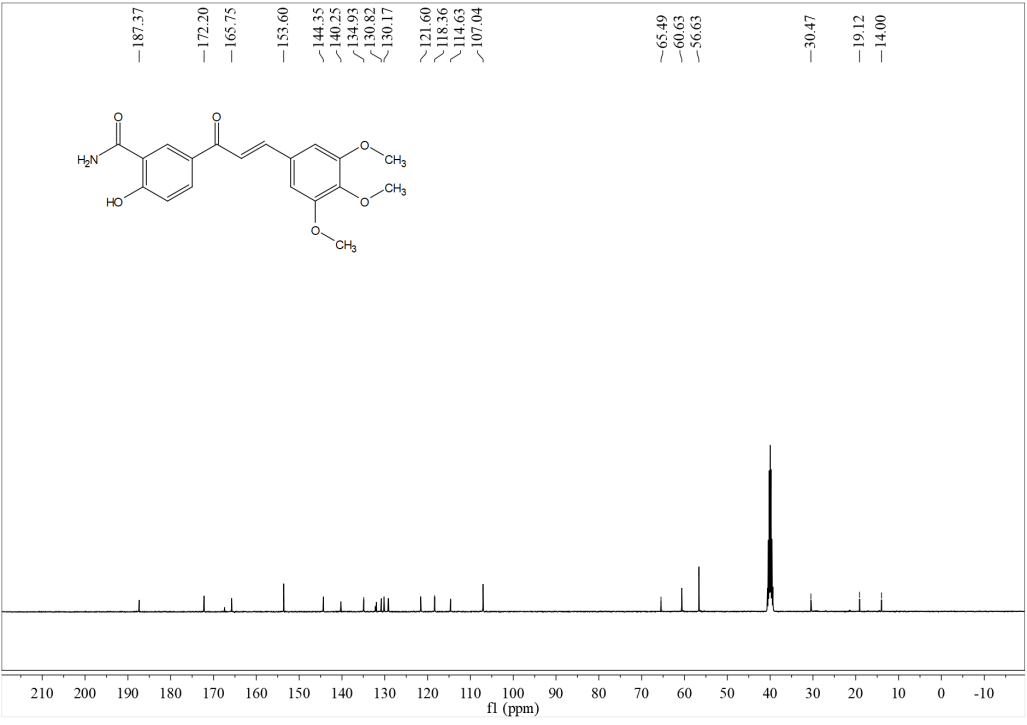


HRMS


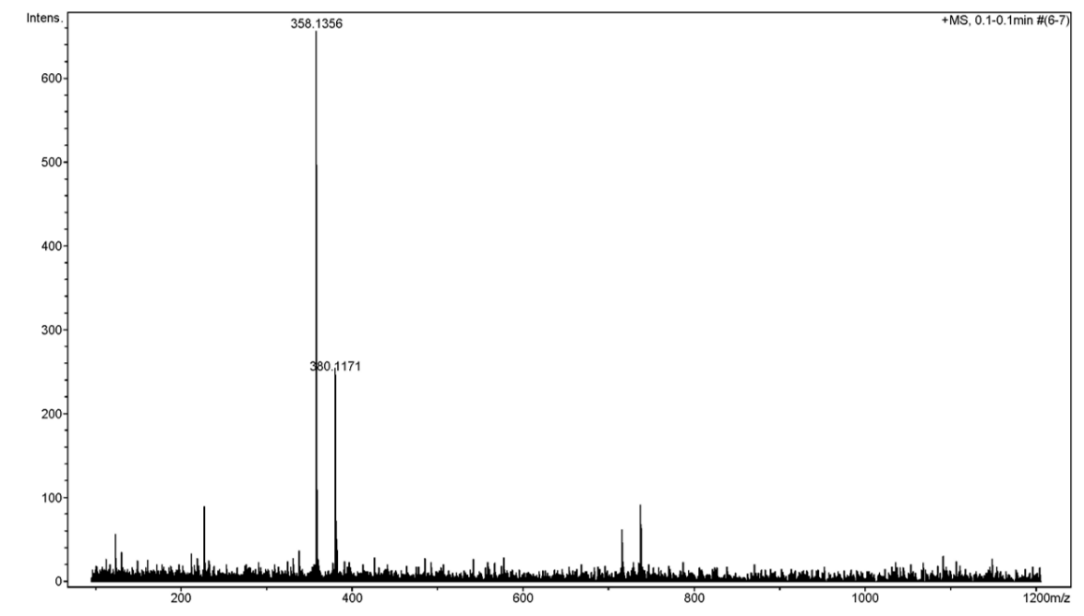


**4.Analytical RP-HPLC chromatograms of Compounds.**

The purity of the synthesized compounds was analyzed using a Chromaster® System Manager high-performance liquid chromatography (HPLC) system equipped with a diode array detector (DAD) (Hitachi High-Tech, Japan). Chromatographic separation was performed on a LaChrom C18 column (P/N 891-5055, 4.6 mm × 250 mm, 5 μm) under isocratic elution with a mobile phase consisting of 20% aqueous solution (A) and 80% methanol (B). The flow rate was set at 1.0 mL/min, the column temperature was maintained at 30 °C, and the detection wavelength was 254 nm with an injection volume of 10 μL. All samples were dissolved in methanol at a concentration of approximately 0.5 mg/mL and filtered through a 0.45 μm polytetrafluoroethylene (PTFE) syringe filter prior to injection. The purity was determined by calculating the percentage of the target compound peak area relative to the total peak area at 254 nm, with additional peak purity assessment supported by DAD spectral analysis.

**Table S1** Purity analysis by RP-HPLC of the target compounds **c1-c31**

| **Compd.** | **Purity% Retention time** | **Compd.** | **Purity% Retention time** |
| --- | --- | --- | --- |
| **c1** | 95.50% rt = 16.01min | **c17** | 98.93% rt = 10.44 min |
| **c2** | 99.74% rt = 11.39 min | **c18** | 95.69% rt = 11.28 min |
| **c3** | 98.14% rt = 11.82 min | **c19** | 97.01% rt = 22.48 min |
| **c4** | 99.43% rt = 14.70 min | **c20** | 97.88% rt = 10.19 min |
| **c5** | 96.17% rt = 15.66 min | **c21** | 97.08% rt = 23.22 min |
| **c6** | 96.06% rt = 18.60 min | **c22** | 98.68% rt = 23.82 min |
| **c7** | 99.64% rt = 17.83 min | **c23** | 95.32% rt = 9.00 min |
| **c8** | 97.52% rt = 17.83 min | **c24** | 98.82% rt = 6.45 min |
| **c9** | 99.14% rt = 21.29 min | **c25** | 98.12% rt = 10.45 min |
| **c10** | 95.69% rt = 20.58 min | **c26** | 97.43% rt = 10.46 min |
| **c11** | 96.70% rt = 14.84 min | **c27** | 95.87% rt = 7.34 min |
| **c12** | 95.50% rt = 16.01 min | **c28** | 98.89% rt = 8.93 min |
| **c13** | 97.68% rt = 15.42 min | **c29** | 95.20% rt = 7.38 min |
| **c14** | 95.10% rt = 23.93 min | **c30** | 97.40% rt = 6.78 min |
| **c15** | 99.55% rt = 20.74 min | **c31** | 97.99% rt = 7.76 min |
| **c16** | 99.71% rt = 24.68 min |  |  |

Compand **c1** (95.50%)


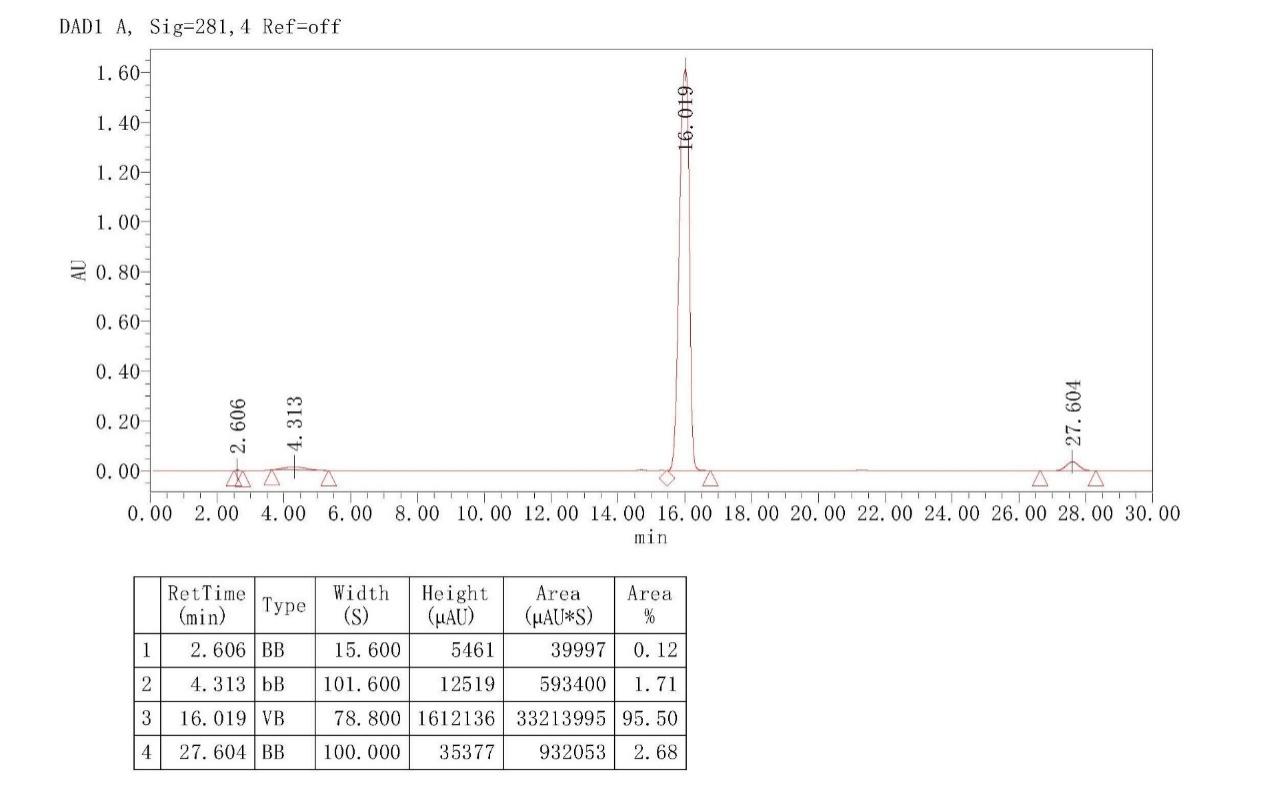


Compand **c2** (99.74%)


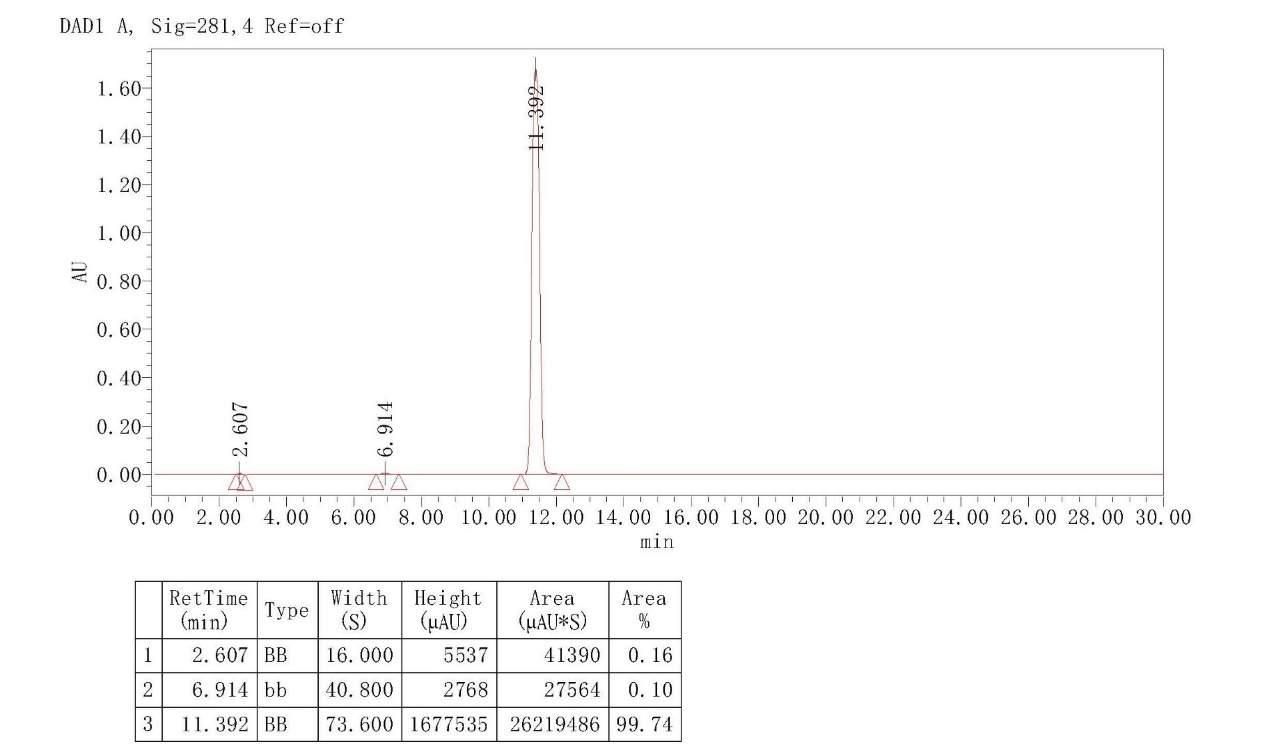


Compand **c3** (98.14%)


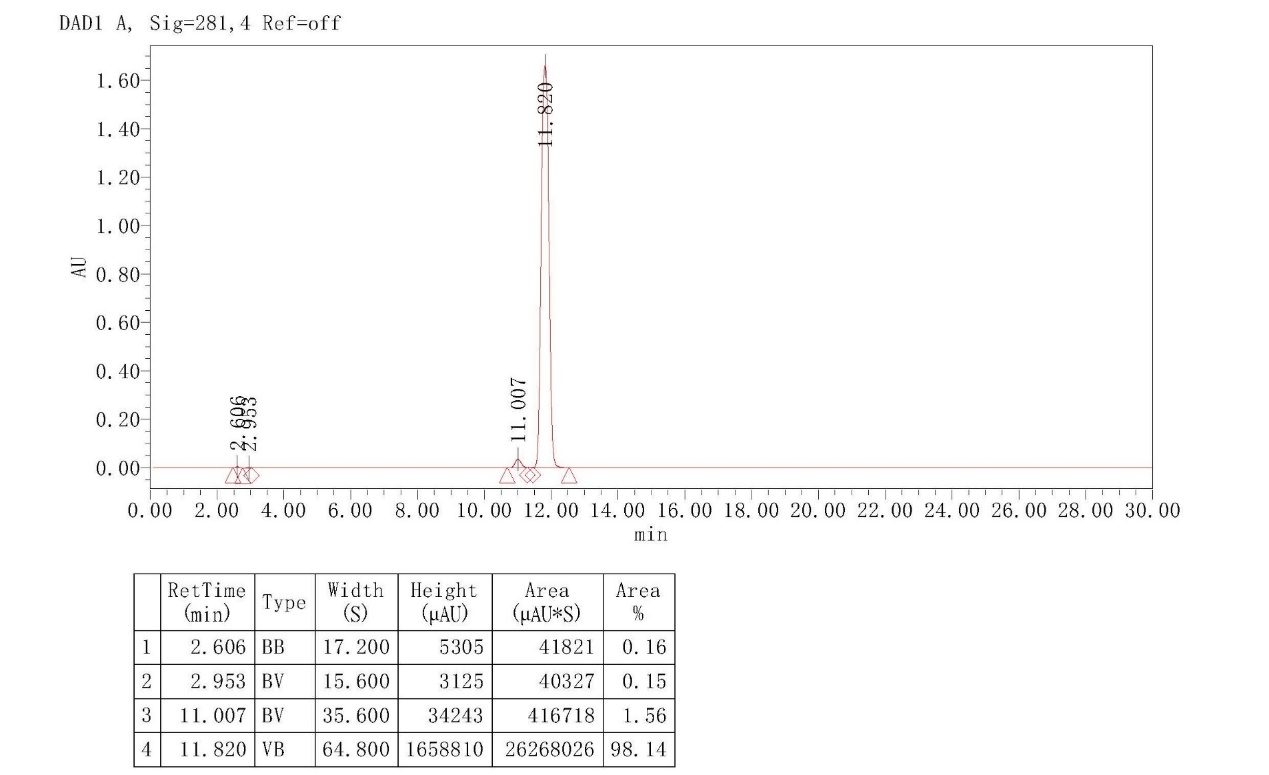


Compand **c4** (99.43%)


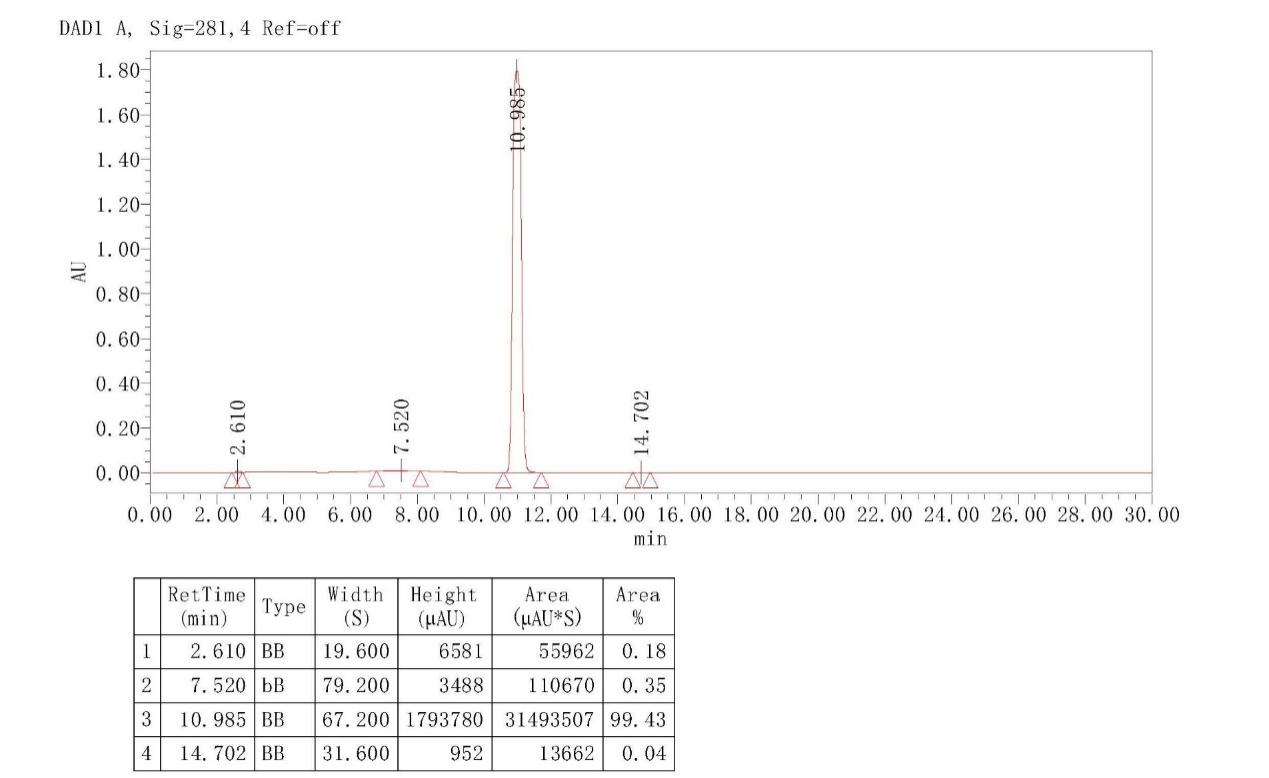


Compand **c5** (96.17%)


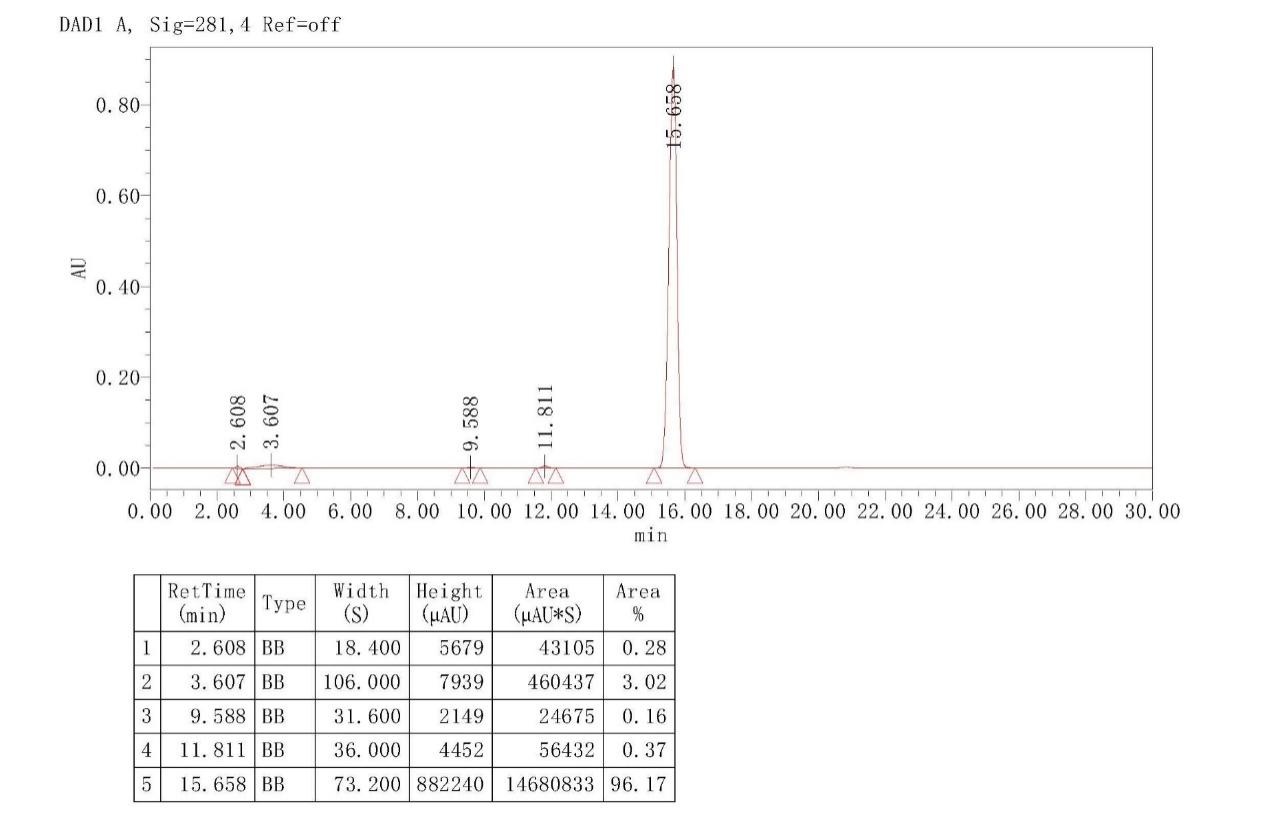


Compand **c6** (96.06%)


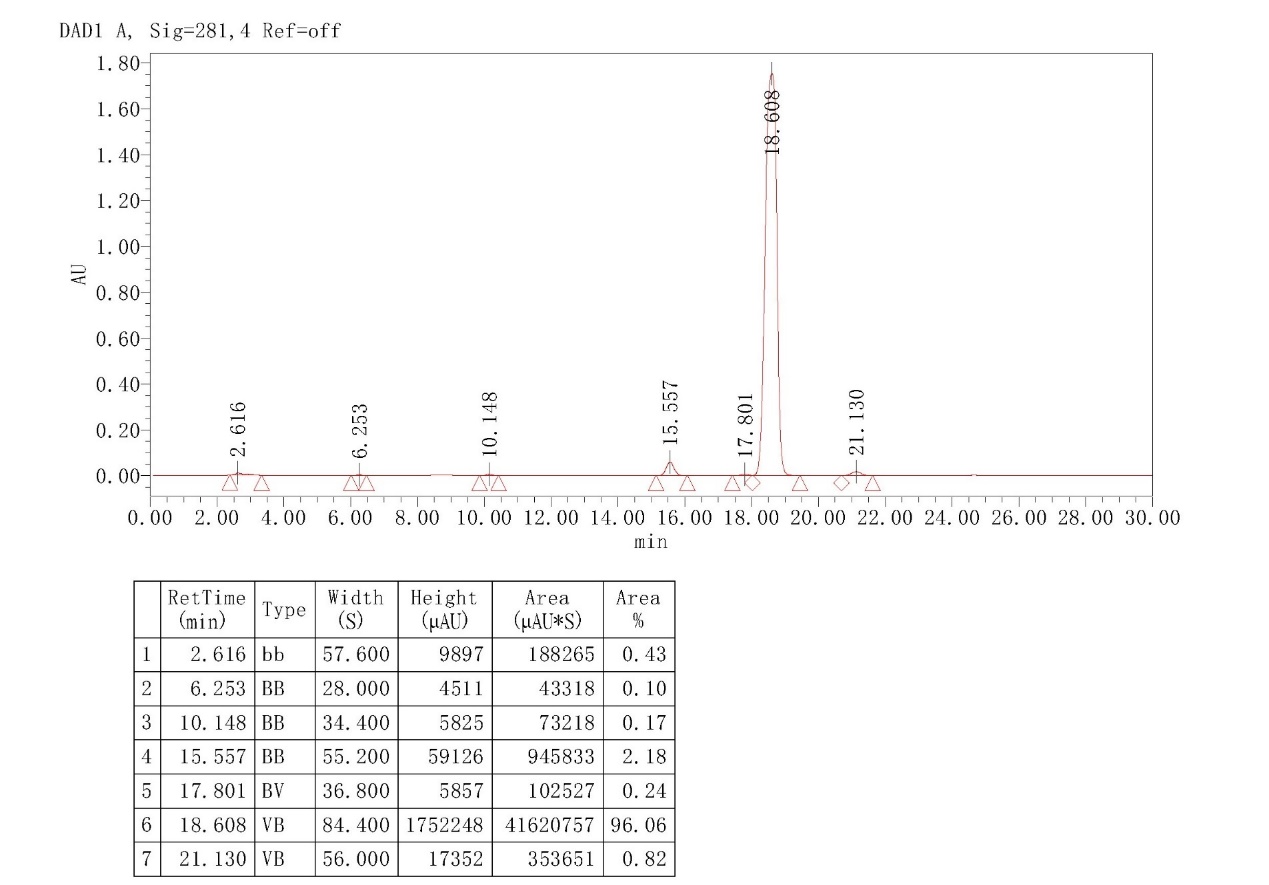


Compand **c7** (99.64%)

Compand **c8** (97.52%)

Compand **c9** (97.52%)

Compand **c10** (95.69%)

Compand **c11** (96.70%)

Compand **c12** (95.50%)

Compand **c13** (97.68%)

Compand **c14** (95.10%)

Compand **c15** (99.55%)

Compand **c16** (99.71%)

Compand **c17** (98.93%)

Compand **c18** (95.69%)

Compand **c19** (97.01%)

Compand **c20** (97.88%)

Compand **c21** (97.08%)

Compand **c22** (98.68%)

Compand **c23** (95.32%)

Compand **c24** (98.82%)

Compand **c25** (98.12%)

Compand **c26** (97.43%)

Compand **c27** (95.87%)

Compand **c28** (98.89%)

Compand **c29** (95.20%)

Compand **c30** (97.40%)

Compand **c31** (97.99%)
